# Supplementary material
Source: publisher figshare collection journal article supplement (https://asha.figshare.com/articles/dataset/_/24052446)
Supplement: Supplementary file 1 [file 1]

## Sheet: JSLHR-22-00618belyk_SuppS1 (1)
Supplemental material, Patel et al., “Speech With Pauses Sounds Deceptive to Listeners With and Without Hearing Impairment,” JSLHR, https://doi.org/10.1044/2023_JSLHR-22-00618
Supplemental Material S1. Raw data.
	Participant	Response	sound1	Trial.Number	Hearing	Group	Condition	Speaker_Sex	Percept	Truth
1	60c222a905c08c2a36e85ae8	This statement is TRUE	Female15-clip1.mp3	1	Hearing	1	Control	Female	TRUE	TRUE
2	60c222a905c08c2a36e85ae8	This statement is TRUE	Male24-clip2.mp3	2	Hearing	1	Control	Male	TRUE	TRUE
3	60c222a905c08c2a36e85ae8	This statement is TRUE	Female42-clip25_3semitones_up.mp3	4	Hearing	1	Pitch	Female	TRUE	TRUE
4	60c222a905c08c2a36e85ae8	This statement is a LIE	Male24-clip10pause_control.mp3	5	Hearing	1	Pause	Male	Lie	FALSE
5	60c222a905c08c2a36e85ae8	This statement is TRUE	Female15-clip19.mp3	6	Hearing	1	Control	Female	TRUE	TRUE
6	60c222a905c08c2a36e85ae8	This statement is a LIE	Female42-clip8pause_control.mp3	7	Hearing	1	Pause	Female	Lie	FALSE
7	60c222a905c08c2a36e85ae8	This statement is TRUE	Female42-clip12.mp3	8	Hearing	1	Control	Female	TRUE	TRUE
8	60c222a905c08c2a36e85ae8	This statement is TRUE	Male24-clip11.mp3	9	Hearing	1	Control	Male	TRUE	TRUE
9	60c222a905c08c2a36e85ae8	This statement is TRUE	Female15-clip13.mp3	10	Hearing	1	Control	Female	TRUE	TRUE
10	60c222a905c08c2a36e85ae8	This statement is TRUE	Female42-clip13_3semitones_up.mp3	11	Hearing	1	Pitch	Female	TRUE	TRUE
11	60c222a905c08c2a36e85ae8	This statement is TRUE	Female15-clip9pause_control.mp3	12	Hearing	1	Pause	Female	TRUE	TRUE
12	60c222a905c08c2a36e85ae8	This statement is TRUE	Male36-clip22.mp3	13	Hearing	1	Control	Male	TRUE	TRUE
13	60c222a905c08c2a36e85ae8	This statement is TRUE	Male36-clip4.mp3	14	Hearing	1	Control	Male	TRUE	TRUE
14	60c222a905c08c2a36e85ae8	This statement is TRUE	Male24-clip6_3semitones_up.mp3	15	Hearing	1	Pitch	Male	TRUE	TRUE
15	60c222a905c08c2a36e85ae8	This statement is TRUE	Male36-clip17_3semitones_up.mp3	17	Hearing	1	Pitch	Male	TRUE	TRUE
16	60c222a905c08c2a36e85ae8	This statement is TRUE	Male24-clip7pause_control.mp3	18	Hearing	1	Pause	Male	TRUE	TRUE
17	60c222a905c08c2a36e85ae8	This statement is TRUE	Male24-clip19pause_control.mp3	19	Hearing	1	Pause	Male	TRUE	TRUE
18	60c222a905c08c2a36e85ae8	This statement is a LIE	Female15-clip3pause_control.mp3	20	Hearing	1	Pause	Female	Lie	FALSE
19	60c222a905c08c2a36e85ae8	This statement is TRUE	Female42-clip16_3semitones_up.mp3	22	Hearing	1	Pitch	Female	TRUE	TRUE
20	60c222a905c08c2a36e85ae8	This statement is TRUE	Female15-clip14_3semitones_up.mp3	23	Hearing	1	Pitch	Female	TRUE	TRUE
21	60c222a905c08c2a36e85ae8	This statement is TRUE	Male24-clip3_3semitones_up.mp3	24	Hearing	1	Pitch	Male	TRUE	TRUE
22	60c222a905c08c2a36e85ae8	This statement is a LIE	Male36-clip12pause_control.mp3	25	Hearing	1	Pause	Male	Lie	FALSE
23	60c222a905c08c2a36e85ae8	This statement is a LIE	Male24-clip8.mp3	26	Hearing	1	Control	Male	Lie	FALSE
24	60c222a905c08c2a36e85ae8	This statement is TRUE	Male36-clip14_3semitones_up.mp3	27	Hearing	1	Pitch	Male	TRUE	TRUE
25	60c222a905c08c2a36e85ae8	This statement is TRUE	Female15-clip6pause_control.mp3	28	Hearing	1	Pause	Female	TRUE	TRUE
26	60c222a905c08c2a36e85ae8	This statement is TRUE	Female42-clip10_3semitones_up.mp3	29	Hearing	1	Pitch	Female	TRUE	TRUE
27	60c222a905c08c2a36e85ae8	This statement is TRUE	Male24-clip4pause_control.mp3	30	Hearing	1	Pause	Male	TRUE	TRUE
28	60c222a905c08c2a36e85ae8	This statement is TRUE	Male24-clip14.mp3	31	Hearing	1	Control	Male	TRUE	TRUE
29	60c222a905c08c2a36e85ae8	This statement is TRUE	Male24-clip20.mp3	32	Hearing	1	Control	Male	TRUE	TRUE
30	60c222a905c08c2a36e85ae8	This statement is TRUE	Female15-clip23_3semitones_up.mp3	33	Hearing	1	Pitch	Female	TRUE	TRUE
31	60c222a905c08c2a36e85ae8	This statement is TRUE	Female42-clip19_3semitones_up.mp3	34	Hearing	1	Pitch	Female	TRUE	TRUE
32	60c222a905c08c2a36e85ae8	This statement is TRUE	Female15-clip22.mp3	35	Hearing	1	Control	Female	TRUE	TRUE
33	60c222a905c08c2a36e85ae8	This statement is a LIE	Female42-clip11pause_control.mp3	36	Hearing	1	Pause	Female	Lie	FALSE
34	60c222a905c08c2a36e85ae8	This statement is a LIE	Male36-clip21pause_control.mp3	37	Hearing	1	Pause	Male	Lie	FALSE
35	60c222a905c08c2a36e85ae8	This statement is TRUE	Female42-clip1_3semitones_up.mp3	38	Hearing	1	Pitch	Female	TRUE	TRUE
36	60c222a905c08c2a36e85ae8	This statement is TRUE	Female15-clip10.mp3	39	Hearing	1	Control	Female	TRUE	TRUE
37	60c222a905c08c2a36e85ae8	This statement is TRUE	Male36-clip1.mp3	40	Hearing	1	Control	Male	TRUE	TRUE
38	60c222a905c08c2a36e85ae8	This statement is TRUE	Female42-clip20pause_control.mp3	42	Hearing	1	Pause	Female	TRUE	TRUE
39	60c222a905c08c2a36e85ae8	This statement is TRUE	Female15-clip18pause_control.mp3	43	Hearing	1	Pause	Female	TRUE	TRUE
40	60c222a905c08c2a36e85ae8	This statement is a LIE	Male36-clip24pause_control.mp3	44	Hearing	1	Pause	Male	Lie	FALSE
41	60c222a905c08c2a36e85ae8	This statement is TRUE	Male36-clip16.mp3	45	Hearing	1	Control	Male	TRUE	TRUE
42	60c222a905c08c2a36e85ae8	This statement is TRUE	Male24-clip24_3semitones_up.mp3	46	Hearing	1	Pitch	Male	TRUE	TRUE
43	60c222a905c08c2a36e85ae8	This statement is TRUE	Male24-clip21_3semitones_up.mp3	47	Hearing	1	Pitch	Male	TRUE	TRUE
44	60c222a905c08c2a36e85ae8	This statement is TRUE	Female42-clip7_3semitones_up.mp3	48	Hearing	1	Pitch	Female	TRUE	TRUE
45	60c222a905c08c2a36e85ae8	This statement is TRUE	Male24-clip16pause_control.mp3	49	Hearing	1	Pause	Male	TRUE	TRUE
46	60c222a905c08c2a36e85ae8	This statement is TRUE	Male24-clip12_3semitones_up.mp3	50	Hearing	1	Pitch	Male	TRUE	TRUE
47	60c222a905c08c2a36e85ae8	This statement is a LIE	Male24-clip13pause_control.mp3	51	Hearing	1	Pause	Male	Lie	FALSE
48	60c222a905c08c2a36e85ae8	This statement is TRUE	Female42-clip4_3semitones_up.mp3	52	Hearing	1	Pitch	Female	TRUE	TRUE
49	60c222a905c08c2a36e85ae8	This statement is TRUE	Male36-clip11_3semitones_up.mp3	53	Hearing	1	Pitch	Male	TRUE	TRUE
50	60c222a905c08c2a36e85ae8	This statement is TRUE	Male36-clip23_3semitones_up.mp3	55	Hearing	1	Pitch	Male	TRUE	TRUE
51	60c222a905c08c2a36e85ae8	This statement is a LIE	Male24-clip25pause_control.mp3	56	Hearing	1	Pause	Male	Lie	FALSE
52	60c222a905c08c2a36e85ae8	This statement is TRUE	Female15-clip20_3semitones_up.mp3	57	Hearing	1	Pitch	Female	TRUE	TRUE
53	60c222a905c08c2a36e85ae8	This statement is TRUE	Female15-clip11_3semitones_up.mp3	58	Hearing	1	Pitch	Female	TRUE	TRUE
54	60c222a905c08c2a36e85ae8	This statement is a LIE	Female15-clip12pause_control.mp3	59	Hearing	1	Pause	Female	Lie	FALSE
55	60c222a905c08c2a36e85ae8	This statement is TRUE	Male36-clip8_3semitones_up.mp3	60	Hearing	1	Pitch	Male	TRUE	TRUE
56	60c222a905c08c2a36e85ae8	This statement is TRUE	Male24-clip17.mp3	61	Hearing	1	Control	Male	TRUE	TRUE
57	60c222a905c08c2a36e85ae8	This statement is TRUE	Female15-clip21pause_control.mp3	62	Hearing	1	Pause	Female	TRUE	TRUE
58	60c222a905c08c2a36e85ae8	This statement is TRUE	Female42-clip6.mp3	63	Hearing	1	Control	Female	TRUE	TRUE
59	60c222a905c08c2a36e85ae8	This statement is TRUE	Female42-clip5pause_control.mp3	64	Hearing	1	Pause	Female	TRUE	TRUE
60	60c222a905c08c2a36e85ae8	This statement is TRUE	Female15-clip8_3semitones_up.mp3	65	Hearing	1	Pitch	Female	TRUE	TRUE
61	60c222a905c08c2a36e85ae8	This statement is a LIE	Male36-clip10.mp3	66	Hearing	1	Control	Male	Lie	FALSE
62	60c222a905c08c2a36e85ae8	This statement is TRUE	Female42-clip17pause_control.mp3	67	Hearing	1	Pause	Female	TRUE	TRUE
63	60c222a905c08c2a36e85ae8	This statement is TRUE	Female15-clip15pauses_control.mp3	68	Hearing	1	Pause	Female	TRUE	TRUE
64	60c222a905c08c2a36e85ae8	This statement is TRUE	Female42-clip24.mp3	69	Hearing	1	Control	Female	TRUE	TRUE
65	60c222a905c08c2a36e85ae8	This statement is TRUE	Female15-clip4.mp3	70	Hearing	1	Control	Female	TRUE	TRUE
66	60c222a905c08c2a36e85ae8	This statement is a LIE	Male36-clip20_3semitones_up.mp3	71	Hearing	1	Pitch	Male	Lie	FALSE
67	60c222a905c08c2a36e85ae8	This statement is TRUE	Female15-clip25.mp3	72	Hearing	1	Control	Female	TRUE	TRUE
68	60c222a905c08c2a36e85ae8	This statement is TRUE	Female42-clip21.mp3	74	Hearing	1	Control	Female	TRUE	TRUE
69	60c222a905c08c2a36e85ae8	This statement is a LIE	Male36-clip2_3semitones_up.mp3	75	Hearing	1	Pitch	Male	Lie	FALSE
70	60c222a905c08c2a36e85ae8	This statement is TRUE	Male24-clip23.mp3	76	Hearing	1	Control	Male	TRUE	TRUE
71	60c222a905c08c2a36e85ae8	This statement is a LIE	Male24-clip1pause_control.mp3	77	Hearing	1	Pause	Male	Lie	FALSE
72	60c222a905c08c2a36e85ae8	This statement is TRUE	Female42-clip18.mp3	78	Hearing	1	Control	Female	TRUE	TRUE
73	60c222a905c08c2a36e85ae8	This statement is a LIE	Female42-clip2pause_control.mp3	79	Hearing	1	Pause	Female	Lie	FALSE
74	60c222a905c08c2a36e85ae8	This statement is TRUE	Male36-clip18pause_control.mp3	80	Hearing	1	Pause	Male	TRUE	TRUE
75	60c222a905c08c2a36e85ae8	This statement is TRUE	Male36-clip5_3semitones_up.mp3	81	Hearing	1	Pitch	Male	TRUE	TRUE
76	60c222a905c08c2a36e85ae8	This statement is TRUE	Male36-clip7.mp3	82	Hearing	1	Control	Male	TRUE	TRUE
77	60c222a905c08c2a36e85ae8	This statement is TRUE	Male36-clip13.mp3	83	Hearing	1	Control	Male	TRUE	TRUE
78	60c222a905c08c2a36e85ae8	This statement is TRUE	Female15-clip7.mp3	84	Hearing	1	Control	Female	TRUE	TRUE
79	60c222a905c08c2a36e85ae8	This statement is TRUE	Male24-clip9_3semitones_up.mp3	85	Hearing	1	Pitch	Male	TRUE	TRUE
80	60c222a905c08c2a36e85ae8	This statement is a LIE	Male24-clip22pause_control.mp3	86	Hearing	1	Pause	Male	Lie	FALSE
81	60c222a905c08c2a36e85ae8	This statement is a LIE	Male36-clip19.mp3	87	Hearing	1	Control	Male	Lie	FALSE
82	60c222a905c08c2a36e85ae8	This statement is TRUE	Female15-clip2_3semitones_up.mp3	88	Hearing	1	Pitch	Female	TRUE	TRUE
83	60c222a905c08c2a36e85ae8	This statement is TRUE	Male24-clip5.mp3	89	Hearing	1	Control	Male	TRUE	TRUE
84	60c222a905c08c2a36e85ae8	This statement is a LIE	Female42-clip14pause_control.mp3	90	Hearing	1	Pause	Female	Lie	FALSE
85	60c222a905c08c2a36e85ae8	This statement is TRUE	Male36-clip15pause_control.mp3	91	Hearing	1	Pause	Male	TRUE	TRUE
86	60c222a905c08c2a36e85ae8	This statement is TRUE	Female42-clip15.mp3	92	Hearing	1	Control	Female	TRUE	TRUE
87	60c222a905c08c2a36e85ae8	This statement is a LIE	Female42-clip3.mp3	93	Hearing	1	Control	Female	Lie	FALSE
88	60c222a905c08c2a36e85ae8	This statement is TRUE	Female42-clip22_3semitones_up.mp3	94	Hearing	1	Pitch	Female	TRUE	TRUE
89	60c222a905c08c2a36e85ae8	This statement is a LIE	Female42-clip9.mp3	95	Hearing	1	Control	Female	Lie	FALSE
90	60c222a905c08c2a36e85ae8	This statement is a LIE	Female42-clip23pause_control.mp3	96	Hearing	1	Pause	Female	Lie	FALSE
91	60c222a905c08c2a36e85ae8	This statement is TRUE	Female15-clip16.mp3	97	Hearing	1	Control	Female	TRUE	TRUE
92	60c222a905c08c2a36e85ae8	This statement is a LIE	Male24-clip18_3semitones_up.mp3	98	Hearing	1	Pitch	Male	Lie	FALSE
93	60c222a905c08c2a36e85ae8	This statement is TRUE	Female15-clip5_3semitones_up.mp3	99	Hearing	1	Pitch	Female	TRUE	TRUE
94	60c222a905c08c2a36e85ae8	This statement is a LIE	Male24-clip15_3semitones_up.mp3	100	Hearing	1	Pitch	Male	Lie	FALSE
95	60c222a905c08c2a36e85ae8	This statement is TRUE	Male36-clip6pause_control.mp3	101	Hearing	1	Pause	Male	TRUE	TRUE
96	60c222a905c08c2a36e85ae8	This statement is a LIE	Female15-clip24pause_control.mp3	102	Hearing	1	Pause	Female	Lie	FALSE
97	60c222a905c08c2a36e85ae8	This statement is TRUE	Female15-clip17_3semitones_up.mp3	103	Hearing	1	Pitch	Female	TRUE	TRUE
98	60c222a905c08c2a36e85ae8	This statement is a LIE	Male36-clip3pause_control.mp3	104	Hearing	1	Pause	Male	Lie	FALSE
99	60c222a905c08c2a36e85ae8	This statement is a LIE	Male36-clip9pause_control.mp3	105	Hearing	1	Pause	Male	Lie	FALSE
100	60c231facc871b908e179b3d	This statement is a LIE	Female15-clip1.mp3	1	Hearing	1	Control	Female	Lie	FALSE
101	60c231facc871b908e179b3d	This statement is a LIE	Male24-clip6_3semitones_up.mp3	2	Hearing	1	Pitch	Male	Lie	FALSE
102	60c231facc871b908e179b3d	This statement is a LIE	Male24-clip19pause_control.mp3	4	Hearing	1	Pause	Male	Lie	FALSE
103	60c231facc871b908e179b3d	This statement is a LIE	Male24-clip18_3semitones_up.mp3	5	Hearing	1	Pitch	Male	Lie	FALSE
104	60c231facc871b908e179b3d	This statement is a LIE	Male36-clip12pause_control.mp3	8	Hearing	1	Pause	Male	Lie	FALSE
105	60c231facc871b908e179b3d	This statement is a LIE	Male36-clip22.mp3	9	Hearing	1	Control	Male	Lie	FALSE
106	60c231facc871b908e179b3d	This statement is TRUE	Female15-clip11_3semitones_up.mp3	10	Hearing	1	Pitch	Female	TRUE	TRUE
107	60c231facc871b908e179b3d	This statement is TRUE	Female15-clip12pause_control.mp3	11	Hearing	1	Pause	Female	TRUE	TRUE
108	60c231facc871b908e179b3d	This statement is TRUE	Female15-clip23_3semitones_up.mp3	12	Hearing	1	Pitch	Female	TRUE	TRUE
109	60c231facc871b908e179b3d	This statement is TRUE	Female42-clip3.mp3	13	Hearing	1	Control	Female	TRUE	TRUE
110	60c231facc871b908e179b3d	This statement is TRUE	Male36-clip13.mp3	14	Hearing	1	Control	Male	TRUE	TRUE
111	60c231facc871b908e179b3d	This statement is TRUE	Female42-clip12.mp3	15	Hearing	1	Control	Female	TRUE	TRUE
112	60c231facc871b908e179b3d	This statement is TRUE	Female42-clip8pause_control.mp3	16	Hearing	1	Pause	Female	TRUE	TRUE
113	60c231facc871b908e179b3d	This statement is TRUE	Male36-clip6pause_control.mp3	17	Hearing	1	Pause	Male	TRUE	TRUE
114	60c231facc871b908e179b3d	This statement is TRUE	Female42-clip21.mp3	18	Hearing	1	Control	Female	TRUE	TRUE
115	60c231facc871b908e179b3d	This statement is TRUE	Male24-clip11.mp3	19	Hearing	1	Control	Male	TRUE	TRUE
116	60c231facc871b908e179b3d	This statement is TRUE	Female42-clip9.mp3	20	Hearing	1	Control	Female	TRUE	TRUE
117	60c231facc871b908e179b3d	This statement is a LIE	Male36-clip3pause_control.mp3	21	Hearing	1	Pause	Male	Lie	FALSE
118	60c231facc871b908e179b3d	This statement is TRUE	Male24-clip23.mp3	22	Hearing	1	Control	Male	TRUE	TRUE
119	60c231facc871b908e179b3d	This statement is TRUE	Male24-clip22pause_control.mp3	23	Hearing	1	Pause	Male	TRUE	TRUE
120	60c231facc871b908e179b3d	This statement is TRUE	Female42-clip20pause_control.mp3	24	Hearing	1	Pause	Female	TRUE	TRUE
121	60c231facc871b908e179b3d	This statement is TRUE	Male24-clip21_3semitones_up.mp3	25	Hearing	1	Pitch	Male	TRUE	TRUE
122	60c231facc871b908e179b3d	This statement is TRUE	Male24-clip24_3semitones_up.mp3	26	Hearing	1	Pitch	Male	TRUE	TRUE
123	60c231facc871b908e179b3d	This statement is a LIE	Male24-clip2.mp3	27	Hearing	1	Control	Male	Lie	FALSE
124	60c231facc871b908e179b3d	This statement is TRUE	Female42-clip1_3semitones_up.mp3	28	Hearing	1	Pitch	Female	TRUE	TRUE
125	60c231facc871b908e179b3d	This statement is TRUE	Female15-clip13.mp3	29	Hearing	1	Control	Female	TRUE	TRUE
126	60c231facc871b908e179b3d	This statement is TRUE	Female15-clip6pause_control.mp3	30	Hearing	1	Pause	Female	TRUE	TRUE
127	60c231facc871b908e179b3d	This statement is TRUE	Female42-clip18.mp3	31	Hearing	1	Control	Female	TRUE	TRUE
128	60c231facc871b908e179b3d	This statement is TRUE	Female15-clip5_3semitones_up.mp3	32	Hearing	1	Pitch	Female	TRUE	TRUE
129	60c231facc871b908e179b3d	This statement is TRUE	Female42-clip25_3semitones_up.mp3	33	Hearing	1	Pitch	Female	TRUE	TRUE
130	60c231facc871b908e179b3d	This statement is TRUE	Female15-clip24pause_control.mp3	34	Hearing	1	Pause	Female	TRUE	TRUE
131	60c231facc871b908e179b3d	This statement is TRUE	Female15-clip25.mp3	35	Hearing	1	Control	Female	TRUE	TRUE
132	60c231facc871b908e179b3d	This statement is TRUE	Male36-clip5_3semitones_up.mp3	36	Hearing	1	Pitch	Male	TRUE	TRUE
133	60c231facc871b908e179b3d	This statement is TRUE	Male24-clip4pause_control.mp3	37	Hearing	1	Pause	Male	TRUE	TRUE
134	60c231facc871b908e179b3d	This statement is a LIE	Male36-clip9pause_control.mp3	38	Hearing	1	Pause	Male	Lie	FALSE
135	60c231facc871b908e179b3d	This statement is a LIE	Female15-clip3pause_control.mp3	39	Hearing	1	Pause	Female	Lie	FALSE
136	60c231facc871b908e179b3d	This statement is TRUE	Male24-clip9_3semitones_up.mp3	40	Hearing	1	Pitch	Male	TRUE	TRUE
137	60c231facc871b908e179b3d	This statement is TRUE	Female42-clip22_3semitones_up.mp3	41	Hearing	1	Pitch	Female	TRUE	TRUE
138	60c231facc871b908e179b3d	This statement is TRUE	Female42-clip14pause_control.mp3	42	Hearing	1	Pause	Female	TRUE	TRUE
139	60c231facc871b908e179b3d	This statement is TRUE	Female42-clip10_3semitones_up.mp3	43	Hearing	1	Pitch	Female	TRUE	TRUE
140	60c231facc871b908e179b3d	This statement is TRUE	Female15-clip17_3semitones_up.mp3	44	Hearing	1	Pitch	Female	TRUE	TRUE
141	60c231facc871b908e179b3d	This statement is a LIE	Male24-clip12_3semitones_up.mp3	45	Hearing	1	Pitch	Male	Lie	FALSE
142	60c231facc871b908e179b3d	This statement is a LIE	Female42-clip11pause_control.mp3	46	Hearing	1	Pause	Female	Lie	FALSE
143	60c231facc871b908e179b3d	This statement is a LIE	Female42-clip6.mp3	47	Hearing	1	Control	Female	Lie	FALSE
144	60c231facc871b908e179b3d	This statement is TRUE	Male24-clip7pause_control.mp3	48	Hearing	1	Pause	Male	TRUE	TRUE
145	60c231facc871b908e179b3d	This statement is TRUE	Female42-clip16_3semitones_up.mp3	49	Hearing	1	Pitch	Female	TRUE	TRUE
146	60c231facc871b908e179b3d	This statement is TRUE	Male36-clip1.mp3	50	Hearing	1	Control	Male	TRUE	TRUE
147	60c231facc871b908e179b3d	This statement is a LIE	Female42-clip4_3semitones_up.mp3	51	Hearing	1	Pitch	Female	Lie	FALSE
148	60c231facc871b908e179b3d	This statement is TRUE	Male36-clip16.mp3	52	Hearing	1	Control	Male	TRUE	TRUE
149	60c231facc871b908e179b3d	This statement is a LIE	Male24-clip14.mp3	53	Hearing	1	Control	Male	Lie	FALSE
150	60c231facc871b908e179b3d	This statement is a LIE	Male24-clip25pause_control.mp3	54	Hearing	1	Pause	Male	Lie	FALSE
151	60c231facc871b908e179b3d	This statement is a LIE	Male24-clip15_3semitones_up.mp3	55	Hearing	1	Pitch	Male	Lie	FALSE
152	60c231facc871b908e179b3d	This statement is TRUE	Female42-clip7_3semitones_up.mp3	56	Hearing	1	Pitch	Female	TRUE	TRUE
153	60c231facc871b908e179b3d	This statement is a LIE	Female42-clip15.mp3	57	Hearing	1	Control	Female	Lie	FALSE
154	60c231facc871b908e179b3d	This statement is TRUE	Male36-clip23_3semitones_up.mp3	58	Hearing	1	Pitch	Male	TRUE	TRUE
155	60c231facc871b908e179b3d	This statement is TRUE	Male24-clip1pause_control.mp3	59	Hearing	1	Pause	Male	TRUE	TRUE
156	60c231facc871b908e179b3d	This statement is a LIE	Male24-clip13pause_control.mp3	60	Hearing	1	Pause	Male	Lie	FALSE
157	60c231facc871b908e179b3d	This statement is a LIE	Female15-clip22.mp3	61	Hearing	1	Control	Female	Lie	FALSE
158	60c231facc871b908e179b3d	This statement is a LIE	Male36-clip21pause_control.mp3	62	Hearing	1	Pause	Male	Lie	FALSE
159	60c231facc871b908e179b3d	This statement is TRUE	Male36-clip2_3semitones_up.mp3	63	Hearing	1	Pitch	Male	TRUE	TRUE
160	60c231facc871b908e179b3d	This statement is TRUE	Female42-clip19_3semitones_up.mp3	64	Hearing	1	Pitch	Female	TRUE	TRUE
161	60c231facc871b908e179b3d	This statement is TRUE	Male24-clip20.mp3	65	Hearing	1	Control	Male	TRUE	TRUE
162	60c231facc871b908e179b3d	This statement is TRUE	Male24-clip16pause_control.mp3	66	Hearing	1	Pause	Male	TRUE	TRUE
163	60c231facc871b908e179b3d	This statement is TRUE	Female15-clip21pause_control.mp3	67	Hearing	1	Pause	Female	TRUE	TRUE
164	60c231facc871b908e179b3d	This statement is a LIE	Male24-clip17.mp3	69	Hearing	1	Control	Male	Lie	FALSE
165	60c231facc871b908e179b3d	This statement is TRUE	Female15-clip19.mp3	70	Hearing	1	Control	Female	TRUE	TRUE
166	60c231facc871b908e179b3d	This statement is TRUE	Female15-clip16.mp3	71	Hearing	1	Control	Female	TRUE	TRUE
167	60c231facc871b908e179b3d	This statement is a LIE	Male36-clip17_3semitones_up.mp3	72	Hearing	1	Pitch	Male	Lie	FALSE
168	60c231facc871b908e179b3d	This statement is TRUE	Male36-clip11_3semitones_up.mp3	73	Hearing	1	Pitch	Male	TRUE	TRUE
169	60c231facc871b908e179b3d	This statement is TRUE	Female42-clip17pause_control.mp3	74	Hearing	1	Pause	Female	TRUE	TRUE
170	60c231facc871b908e179b3d	This statement is TRUE	Female15-clip8_3semitones_up.mp3	76	Hearing	1	Pitch	Female	TRUE	TRUE
171	60c231facc871b908e179b3d	This statement is a LIE	Male24-clip10pause_control.mp3	77	Hearing	1	Pause	Male	Lie	FALSE
172	60c231facc871b908e179b3d	This statement is a LIE	Female15-clip20_3semitones_up.mp3	78	Hearing	1	Pitch	Female	Lie	FALSE
173	60c231facc871b908e179b3d	This statement is a LIE	Female15-clip15pauses_control.mp3	79	Hearing	1	Pause	Female	Lie	FALSE
174	60c231facc871b908e179b3d	This statement is TRUE	Male36-clip4.mp3	80	Hearing	1	Control	Male	TRUE	TRUE
175	60c231facc871b908e179b3d	This statement is a LIE	Female42-clip2pause_control.mp3	81	Hearing	1	Pause	Female	Lie	FALSE
176	60c231facc871b908e179b3d	This statement is TRUE	Female15-clip18pause_control.mp3	82	Hearing	1	Pause	Female	TRUE	TRUE
177	60c231facc871b908e179b3d	This statement is a LIE	Male24-clip5.mp3	83	Hearing	1	Control	Male	Lie	FALSE
178	60c231facc871b908e179b3d	This statement is TRUE	Female15-clip2_3semitones_up.mp3	84	Hearing	1	Pitch	Female	TRUE	TRUE
179	60c231facc871b908e179b3d	This statement is TRUE	Female15-clip10.mp3	85	Hearing	1	Control	Female	TRUE	TRUE
180	60c231facc871b908e179b3d	This statement is TRUE	Male36-clip18pause_control.mp3	86	Hearing	1	Pause	Male	TRUE	TRUE
181	60c231facc871b908e179b3d	This statement is a LIE	Male36-clip24pause_control.mp3	87	Hearing	1	Pause	Male	Lie	FALSE
182	60c231facc871b908e179b3d	This statement is a LIE	Female42-clip24.mp3	88	Hearing	1	Control	Female	Lie	FALSE
183	60c231facc871b908e179b3d	This statement is a LIE	Male24-clip8.mp3	89	Hearing	1	Control	Male	Lie	FALSE
184	60c231facc871b908e179b3d	This statement is TRUE	Male36-clip20_3semitones_up.mp3	90	Hearing	1	Pitch	Male	TRUE	TRUE
185	60c231facc871b908e179b3d	This statement is TRUE	Male24-clip3_3semitones_up.mp3	91	Hearing	1	Pitch	Male	TRUE	TRUE
186	60c231facc871b908e179b3d	This statement is TRUE	Male36-clip19.mp3	92	Hearing	1	Control	Male	TRUE	TRUE
187	60c231facc871b908e179b3d	This statement is TRUE	Female42-clip5pause_control.mp3	94	Hearing	1	Pause	Female	TRUE	TRUE
188	60c231facc871b908e179b3d	This statement is a LIE	Male36-clip7.mp3	95	Hearing	1	Control	Male	Lie	FALSE
189	60c231facc871b908e179b3d	This statement is a LIE	Female15-clip9pause_control.mp3	96	Hearing	1	Pause	Female	Lie	FALSE
190	60c231facc871b908e179b3d	This statement is TRUE	Female15-clip14_3semitones_up.mp3	97	Hearing	1	Pitch	Female	TRUE	TRUE
191	60c231facc871b908e179b3d	This statement is a LIE	Male36-clip10.mp3	98	Hearing	1	Control	Male	Lie	FALSE
192	60c231facc871b908e179b3d	This statement is TRUE	Female15-clip4.mp3	99	Hearing	1	Control	Female	TRUE	TRUE
193	60c231facc871b908e179b3d	This statement is TRUE	Male36-clip8_3semitones_up.mp3	100	Hearing	1	Pitch	Male	TRUE	TRUE
194	60c231facc871b908e179b3d	This statement is TRUE	Male36-clip15pause_control.mp3	101	Hearing	1	Pause	Male	TRUE	TRUE
195	60c231facc871b908e179b3d	This statement is a LIE	Female42-clip13_3semitones_up.mp3	102	Hearing	1	Pitch	Female	Lie	FALSE
196	60c231facc871b908e179b3d	This statement is TRUE	Male36-clip14_3semitones_up.mp3	103	Hearing	1	Pitch	Male	TRUE	TRUE
197	60c231facc871b908e179b3d	This statement is a LIE	Female42-clip23pause_control.mp3	104	Hearing	1	Pause	Female	Lie	FALSE
198	60c231facc871b908e179b3d	This statement is TRUE	Female15-clip7.mp3	105	Hearing	1	Control	Female	TRUE	TRUE
199	60c23417d2f1ae89e73f131d	This statement is TRUE	Female15-clip1.mp3	1	Hearing	1	Control	Female	TRUE	TRUE
200	60c23417d2f1ae89e73f131d	This statement is a LIE	Male24-clip8.mp3	2	Hearing	1	Control	Male	Lie	FALSE
201	60c23417d2f1ae89e73f131d	This statement is TRUE	Male24-clip2.mp3	3	Hearing	1	Control	Male	TRUE	TRUE
202	60c23417d2f1ae89e73f131d	This statement is a LIE	Male24-clip21_3semitones_up.mp3	4	Hearing	1	Pitch	Male	Lie	FALSE
203	60c23417d2f1ae89e73f131d	This statement is a LIE	Female15-clip25.mp3	5	Hearing	1	Control	Female	Lie	FALSE
204	60c23417d2f1ae89e73f131d	This statement is TRUE	Male24-clip19pause_control.mp3	6	Hearing	1	Pause	Male	TRUE	TRUE
205	60c23417d2f1ae89e73f131d	This statement is TRUE	Female42-clip20pause_control.mp3	7	Hearing	1	Pause	Female	TRUE	TRUE
206	60c23417d2f1ae89e73f131d	This statement is TRUE	Female42-clip4_3semitones_up.mp3	8	Hearing	1	Pitch	Female	TRUE	TRUE
207	60c23417d2f1ae89e73f131d	This statement is a LIE	Male24-clip9_3semitones_up.mp3	9	Hearing	1	Pitch	Male	Lie	FALSE
208	60c23417d2f1ae89e73f131d	This statement is TRUE	Female15-clip8_3semitones_up.mp3	10	Hearing	1	Pitch	Female	TRUE	TRUE
209	60c23417d2f1ae89e73f131d	This statement is a LIE	Male36-clip22.mp3	11	Hearing	1	Control	Male	Lie	FALSE
210	60c23417d2f1ae89e73f131d	This statement is a LIE	Female15-clip19.mp3	12	Hearing	1	Control	Female	Lie	FALSE
211	60c23417d2f1ae89e73f131d	This statement is a LIE	Female15-clip17_3semitones_up.mp3	13	Hearing	1	Pitch	Female	Lie	FALSE
212	60c23417d2f1ae89e73f131d	This statement is a LIE	Female42-clip17pause_control.mp3	14	Hearing	1	Pause	Female	Lie	FALSE
213	60c23417d2f1ae89e73f131d	This statement is a LIE	Female42-clip16_3semitones_up.mp3	15	Hearing	1	Pitch	Female	Lie	FALSE
214	60c23417d2f1ae89e73f131d	This statement is TRUE	Female42-clip7_3semitones_up.mp3	16	Hearing	1	Pitch	Female	TRUE	TRUE
215	60c23417d2f1ae89e73f131d	This statement is a LIE	Female15-clip6pause_control.mp3	17	Hearing	1	Pause	Female	Lie	FALSE
216	60c23417d2f1ae89e73f131d	This statement is TRUE	Female42-clip18.mp3	18	Hearing	1	Control	Female	TRUE	TRUE
217	60c23417d2f1ae89e73f131d	This statement is TRUE	Male24-clip18_3semitones_up.mp3	19	Hearing	1	Pitch	Male	TRUE	TRUE
218	60c23417d2f1ae89e73f131d	This statement is TRUE	Male36-clip10.mp3	20	Hearing	1	Control	Male	TRUE	TRUE
219	60c23417d2f1ae89e73f131d	This statement is TRUE	Female42-clip1_3semitones_up.mp3	21	Hearing	1	Pitch	Female	TRUE	TRUE
220	60c23417d2f1ae89e73f131d	This statement is a LIE	Male24-clip22pause_control.mp3	22	Hearing	1	Pause	Male	Lie	FALSE
221	60c23417d2f1ae89e73f131d	This statement is a LIE	Female42-clip25_3semitones_up.mp3	23	Hearing	1	Pitch	Female	Lie	FALSE
222	60c23417d2f1ae89e73f131d	This statement is TRUE	Male36-clip6pause_control.mp3	24	Hearing	1	Pause	Male	TRUE	TRUE
223	60c23417d2f1ae89e73f131d	This statement is TRUE	Male36-clip7.mp3	25	Hearing	1	Control	Male	TRUE	TRUE
224	60c23417d2f1ae89e73f131d	This statement is TRUE	Male36-clip20_3semitones_up.mp3	26	Hearing	1	Pitch	Male	TRUE	TRUE
225	60c23417d2f1ae89e73f131d	This statement is a LIE	Female42-clip9.mp3	27	Hearing	1	Control	Female	Lie	FALSE
226	60c23417d2f1ae89e73f131d	This statement is TRUE	Female15-clip23_3semitones_up.mp3	30	Hearing	1	Pitch	Female	TRUE	TRUE
227	60c23417d2f1ae89e73f131d	This statement is TRUE	Female15-clip16.mp3	31	Hearing	1	Control	Female	TRUE	TRUE
228	60c23417d2f1ae89e73f131d	This statement is a LIE	Female42-clip8pause_control.mp3	33	Hearing	1	Pause	Female	Lie	FALSE
229	60c23417d2f1ae89e73f131d	This statement is a LIE	Female42-clip15.mp3	34	Hearing	1	Control	Female	Lie	FALSE
230	60c23417d2f1ae89e73f131d	This statement is TRUE	Female15-clip3pause_control.mp3	35	Hearing	1	Pause	Female	TRUE	TRUE
231	60c23417d2f1ae89e73f131d	This statement is a LIE	Male36-clip5_3semitones_up.mp3	36	Hearing	1	Pitch	Male	Lie	FALSE
232	60c23417d2f1ae89e73f131d	This statement is TRUE	Male24-clip16pause_control.mp3	37	Hearing	1	Pause	Male	TRUE	TRUE
233	60c23417d2f1ae89e73f131d	This statement is TRUE	Male24-clip17.mp3	38	Hearing	1	Control	Male	TRUE	TRUE
234	60c23417d2f1ae89e73f131d	This statement is TRUE	Male36-clip19.mp3	39	Hearing	1	Control	Male	TRUE	TRUE
235	60c23417d2f1ae89e73f131d	This statement is TRUE	Male24-clip11.mp3	40	Hearing	1	Control	Male	TRUE	TRUE
236	60c23417d2f1ae89e73f131d	This statement is a LIE	Female15-clip15pauses_control.mp3	41	Hearing	1	Pause	Female	Lie	FALSE
237	60c23417d2f1ae89e73f131d	This statement is TRUE	Female15-clip11_3semitones_up.mp3	42	Hearing	1	Pitch	Female	TRUE	TRUE
238	60c23417d2f1ae89e73f131d	This statement is TRUE	Male36-clip16.mp3	43	Hearing	1	Control	Male	TRUE	TRUE
239	60c23417d2f1ae89e73f131d	This statement is a LIE	Male24-clip25pause_control.mp3	44	Hearing	1	Pause	Male	Lie	FALSE
240	60c23417d2f1ae89e73f131d	This statement is a LIE	Male36-clip4.mp3	45	Hearing	1	Control	Male	Lie	FALSE
241	60c23417d2f1ae89e73f131d	This statement is TRUE	Male36-clip3pause_control.mp3	46	Hearing	1	Pause	Male	TRUE	TRUE
242	60c23417d2f1ae89e73f131d	This statement is a LIE	Male24-clip14.mp3	48	Hearing	1	Control	Male	Lie	FALSE
243	60c23417d2f1ae89e73f131d	This statement is TRUE	Female15-clip4.mp3	49	Hearing	1	Control	Female	TRUE	TRUE
244	60c23417d2f1ae89e73f131d	This statement is TRUE	Male24-clip10pause_control.mp3	50	Hearing	1	Pause	Male	TRUE	TRUE
245	60c23417d2f1ae89e73f131d	This statement is a LIE	Male36-clip15pause_control.mp3	51	Hearing	1	Pause	Male	Lie	FALSE
246	60c23417d2f1ae89e73f131d	This statement is a LIE	Male24-clip4pause_control.mp3	52	Hearing	1	Pause	Male	Lie	FALSE
247	60c23417d2f1ae89e73f131d	This statement is a LIE	Female42-clip21.mp3	53	Hearing	1	Control	Female	Lie	FALSE
248	60c23417d2f1ae89e73f131d	This statement is TRUE	Female42-clip23pause_control.mp3	54	Hearing	1	Pause	Female	TRUE	TRUE
249	60c23417d2f1ae89e73f131d	This statement is a LIE	Female42-clip2pause_control.mp3	55	Hearing	1	Pause	Female	Lie	FALSE
250	60c23417d2f1ae89e73f131d	This statement is a LIE	Female42-clip3.mp3	56	Hearing	1	Control	Female	Lie	FALSE
251	60c23417d2f1ae89e73f131d	This statement is TRUE	Female15-clip22.mp3	57	Hearing	1	Control	Female	TRUE	TRUE
252	60c23417d2f1ae89e73f131d	This statement is a LIE	Female15-clip21pause_control.mp3	58	Hearing	1	Pause	Female	Lie	FALSE
253	60c23417d2f1ae89e73f131d	This statement is TRUE	Male36-clip23_3semitones_up.mp3	60	Hearing	1	Pitch	Male	TRUE	TRUE
254	60c23417d2f1ae89e73f131d	This statement is TRUE	Female15-clip12pause_control.mp3	61	Hearing	1	Pause	Female	TRUE	TRUE
255	60c23417d2f1ae89e73f131d	This statement is TRUE	Male24-clip1pause_control.mp3	62	Hearing	1	Pause	Male	TRUE	TRUE
256	60c23417d2f1ae89e73f131d	This statement is TRUE	Female42-clip22_3semitones_up.mp3	63	Hearing	1	Pitch	Female	TRUE	TRUE
257	60c23417d2f1ae89e73f131d	This statement is a LIE	Female15-clip9pause_control.mp3	64	Hearing	1	Pause	Female	Lie	FALSE
258	60c23417d2f1ae89e73f131d	This statement is a LIE	Male36-clip18pause_control.mp3	65	Hearing	1	Pause	Male	Lie	FALSE
259	60c23417d2f1ae89e73f131d	This statement is TRUE	Male24-clip3_3semitones_up.mp3	66	Hearing	1	Pitch	Male	TRUE	TRUE
260	60c23417d2f1ae89e73f131d	This statement is TRUE	Female15-clip5_3semitones_up.mp3	67	Hearing	1	Pitch	Female	TRUE	TRUE
261	60c23417d2f1ae89e73f131d	This statement is TRUE	Male24-clip24_3semitones_up.mp3	68	Hearing	1	Pitch	Male	TRUE	TRUE
262	60c23417d2f1ae89e73f131d	This statement is TRUE	Female42-clip12.mp3	69	Hearing	1	Control	Female	TRUE	TRUE
263	60c23417d2f1ae89e73f131d	This statement is a LIE	Female15-clip24pause_control.mp3	70	Hearing	1	Pause	Female	Lie	FALSE
264	60c23417d2f1ae89e73f131d	This statement is a LIE	Male24-clip12_3semitones_up.mp3	71	Hearing	1	Pitch	Male	Lie	FALSE
265	60c23417d2f1ae89e73f131d	This statement is a LIE	Female15-clip10.mp3	72	Hearing	1	Control	Female	Lie	FALSE
266	60c23417d2f1ae89e73f131d	This statement is TRUE	Female15-clip7.mp3	73	Hearing	1	Control	Female	TRUE	TRUE
267	60c23417d2f1ae89e73f131d	This statement is TRUE	Female42-clip14pause_control.mp3	74	Hearing	1	Pause	Female	TRUE	TRUE
268	60c23417d2f1ae89e73f131d	This statement is TRUE	Female42-clip5pause_control.mp3	75	Hearing	1	Pause	Female	TRUE	TRUE
269	60c23417d2f1ae89e73f131d	This statement is TRUE	Female15-clip20_3semitones_up.mp3	76	Hearing	1	Pitch	Female	TRUE	TRUE
270	60c23417d2f1ae89e73f131d	This statement is TRUE	Female42-clip6.mp3	77	Hearing	1	Control	Female	TRUE	TRUE
271	60c23417d2f1ae89e73f131d	This statement is a LIE	Female42-clip11pause_control.mp3	78	Hearing	1	Pause	Female	Lie	FALSE
272	60c23417d2f1ae89e73f131d	This statement is a LIE	Male36-clip21pause_control.mp3	79	Hearing	1	Pause	Male	Lie	FALSE
273	60c23417d2f1ae89e73f131d	This statement is TRUE	Female15-clip2_3semitones_up.mp3	80	Hearing	1	Pitch	Female	TRUE	TRUE
274	60c23417d2f1ae89e73f131d	This statement is TRUE	Male36-clip17_3semitones_up.mp3	81	Hearing	1	Pitch	Male	TRUE	TRUE
275	60c23417d2f1ae89e73f131d	This statement is TRUE	Male36-clip11_3semitones_up.mp3	82	Hearing	1	Pitch	Male	TRUE	TRUE
276	60c23417d2f1ae89e73f131d	This statement is a LIE	Male36-clip13.mp3	83	Hearing	1	Control	Male	Lie	FALSE
277	60c23417d2f1ae89e73f131d	This statement is TRUE	Female15-clip14_3semitones_up.mp3	84	Hearing	1	Pitch	Female	TRUE	TRUE
278	60c23417d2f1ae89e73f131d	This statement is a LIE	Male36-clip12pause_control.mp3	85	Hearing	1	Pause	Male	Lie	FALSE
279	60c23417d2f1ae89e73f131d	This statement is a LIE	Male36-clip8_3semitones_up.mp3	86	Hearing	1	Pitch	Male	Lie	FALSE
280	60c23417d2f1ae89e73f131d	This statement is a LIE	Male24-clip7pause_control.mp3	87	Hearing	1	Pause	Male	Lie	FALSE
281	60c23417d2f1ae89e73f131d	This statement is a LIE	Female15-clip18pause_control.mp3	88	Hearing	1	Pause	Female	Lie	FALSE
282	60c23417d2f1ae89e73f131d	This statement is TRUE	Male24-clip5.mp3	89	Hearing	1	Control	Male	TRUE	TRUE
283	60c23417d2f1ae89e73f131d	This statement is TRUE	Male36-clip14_3semitones_up.mp3	90	Hearing	1	Pitch	Male	TRUE	TRUE
284	60c23417d2f1ae89e73f131d	This statement is a LIE	Male36-clip1.mp3	91	Hearing	1	Control	Male	Lie	FALSE
285	60c23417d2f1ae89e73f131d	This statement is TRUE	Male24-clip13pause_control.mp3	92	Hearing	1	Pause	Male	TRUE	TRUE
286	60c23417d2f1ae89e73f131d	This statement is TRUE	Male24-clip15_3semitones_up.mp3	93	Hearing	1	Pitch	Male	TRUE	TRUE
287	60c23417d2f1ae89e73f131d	This statement is TRUE	Female42-clip24.mp3	94	Hearing	1	Control	Female	TRUE	TRUE
288	60c23417d2f1ae89e73f131d	This statement is TRUE	Male36-clip2_3semitones_up.mp3	95	Hearing	1	Pitch	Male	TRUE	TRUE
289	60c23417d2f1ae89e73f131d	This statement is a LIE	Male24-clip6_3semitones_up.mp3	96	Hearing	1	Pitch	Male	Lie	FALSE
290	60c23417d2f1ae89e73f131d	This statement is a LIE	Male24-clip20.mp3	97	Hearing	1	Control	Male	Lie	FALSE
291	60c23417d2f1ae89e73f131d	This statement is a LIE	Female15-clip13.mp3	98	Hearing	1	Control	Female	Lie	FALSE
292	60c23417d2f1ae89e73f131d	This statement is a LIE	Male36-clip24pause_control.mp3	99	Hearing	1	Pause	Male	Lie	FALSE
293	60c23417d2f1ae89e73f131d	This statement is TRUE	Male24-clip23.mp3	100	Hearing	1	Control	Male	TRUE	TRUE
294	60c23417d2f1ae89e73f131d	This statement is a LIE	Male36-clip9pause_control.mp3	101	Hearing	1	Pause	Male	Lie	FALSE
295	60c23417d2f1ae89e73f131d	This statement is a LIE	Female42-clip10_3semitones_up.mp3	102	Hearing	1	Pitch	Female	Lie	FALSE
296	60c23417d2f1ae89e73f131d	This statement is a LIE	Female42-clip19_3semitones_up.mp3	104	Hearing	1	Pitch	Female	Lie	FALSE
297	60c23417d2f1ae89e73f131d	This statement is a LIE	Female42-clip13_3semitones_up.mp3	105	Hearing	1	Pitch	Female	Lie	FALSE
298	60c3ab53e85071a5d32e769e	This statement is a LIE	Female15-clip1.mp3	1	Hearing	1	Control	Female	Lie	FALSE
299	60c3ab53e85071a5d32e769e	This statement is a LIE	Female15-clip24pause_control.mp3	2	Hearing	1	Pause	Female	Lie	FALSE
300	60c3ab53e85071a5d32e769e	This statement is TRUE	Female42-clip18.mp3	3	Hearing	1	Control	Female	TRUE	TRUE
301	60c3ab53e85071a5d32e769e	This statement is TRUE	Female15-clip16.mp3	4	Hearing	1	Control	Female	TRUE	TRUE
302	60c3ab53e85071a5d32e769e	This statement is TRUE	Male36-clip14_3semitones_up.mp3	5	Hearing	1	Pitch	Male	TRUE	TRUE
303	60c3ab53e85071a5d32e769e	This statement is TRUE	Female42-clip17pause_control.mp3	6	Hearing	1	Pause	Female	TRUE	TRUE
304	60c3ab53e85071a5d32e769e	This statement is TRUE	Female15-clip6pause_control.mp3	7	Hearing	1	Pause	Female	TRUE	TRUE
305	60c3ab53e85071a5d32e769e	This statement is a LIE	Female15-clip15pauses_control.mp3	10	Hearing	1	Pause	Female	Lie	FALSE
306	60c3ab53e85071a5d32e769e	This statement is TRUE	Male24-clip9_3semitones_up.mp3	11	Hearing	1	Pitch	Male	TRUE	TRUE
307	60c3ab53e85071a5d32e769e	This statement is TRUE	Female42-clip15.mp3	12	Hearing	1	Control	Female	TRUE	TRUE
308	60c3ab53e85071a5d32e769e	This statement is TRUE	Female15-clip20_3semitones_up.mp3	13	Hearing	1	Pitch	Female	TRUE	TRUE
309	60c3ab53e85071a5d32e769e	This statement is TRUE	Female15-clip2_3semitones_up.mp3	14	Hearing	1	Pitch	Female	TRUE	TRUE
310	60c3ab53e85071a5d32e769e	This statement is TRUE	Male24-clip10pause_control.mp3	15	Hearing	1	Pause	Male	TRUE	TRUE
311	60c3ab53e85071a5d32e769e	This statement is TRUE	Female15-clip5_3semitones_up.mp3	16	Hearing	1	Pitch	Female	TRUE	TRUE
312	60c3ab53e85071a5d32e769e	This statement is TRUE	Female42-clip4_3semitones_up.mp3	17	Hearing	1	Pitch	Female	TRUE	TRUE
313	60c3ab53e85071a5d32e769e	This statement is TRUE	Female15-clip11_3semitones_up.mp3	19	Hearing	1	Pitch	Female	TRUE	TRUE
314	60c3ab53e85071a5d32e769e	This statement is a LIE	Female42-clip14pause_control.mp3	20	Hearing	1	Pause	Female	Lie	FALSE
315	60c3ab53e85071a5d32e769e	This statement is TRUE	Male36-clip1.mp3	21	Hearing	1	Control	Male	TRUE	TRUE
316	60c3ab53e85071a5d32e769e	This statement is TRUE	Male24-clip25pause_control.mp3	22	Hearing	1	Pause	Male	TRUE	TRUE
317	60c3ab53e85071a5d32e769e	This statement is TRUE	Male24-clip18_3semitones_up.mp3	23	Hearing	1	Pitch	Male	TRUE	TRUE
318	60c3ab53e85071a5d32e769e	This statement is TRUE	Male24-clip5.mp3	24	Hearing	1	Control	Male	TRUE	TRUE
319	60c3ab53e85071a5d32e769e	This statement is TRUE	Female42-clip6.mp3	25	Hearing	1	Control	Female	TRUE	TRUE
320	60c3ab53e85071a5d32e769e	This statement is TRUE	Male36-clip23_3semitones_up.mp3	26	Hearing	1	Pitch	Male	TRUE	TRUE
321	60c3ab53e85071a5d32e769e	This statement is TRUE	Female15-clip17_3semitones_up.mp3	27	Hearing	1	Pitch	Female	TRUE	TRUE
322	60c3ab53e85071a5d32e769e	This statement is TRUE	Female15-clip13.mp3	28	Hearing	1	Control	Female	TRUE	TRUE
323	60c3ab53e85071a5d32e769e	This statement is TRUE	Female15-clip23_3semitones_up.mp3	29	Hearing	1	Pitch	Female	TRUE	TRUE
324	60c3ab53e85071a5d32e769e	This statement is TRUE	Male24-clip3_3semitones_up.mp3	30	Hearing	1	Pitch	Male	TRUE	TRUE
325	60c3ab53e85071a5d32e769e	This statement is TRUE	Female42-clip9.mp3	31	Hearing	1	Control	Female	TRUE	TRUE
326	60c3ab53e85071a5d32e769e	This statement is TRUE	Male24-clip16pause_control.mp3	32	Hearing	1	Pause	Male	TRUE	TRUE
327	60c3ab53e85071a5d32e769e	This statement is a LIE	Female42-clip10_3semitones_up.mp3	33	Hearing	1	Pitch	Female	Lie	FALSE
328	60c3ab53e85071a5d32e769e	This statement is TRUE	Male36-clip10.mp3	34	Hearing	1	Control	Male	TRUE	TRUE
329	60c3ab53e85071a5d32e769e	This statement is a LIE	Female15-clip22.mp3	36	Hearing	1	Control	Female	Lie	FALSE
330	60c3ab53e85071a5d32e769e	This statement is a LIE	Male24-clip19pause_control.mp3	37	Hearing	1	Pause	Male	Lie	FALSE
331	60c3ab53e85071a5d32e769e	This statement is a LIE	Female42-clip3.mp3	38	Hearing	1	Control	Female	Lie	FALSE
332	60c3ab53e85071a5d32e769e	This statement is TRUE	Male24-clip24_3semitones_up.mp3	39	Hearing	1	Pitch	Male	TRUE	TRUE
333	60c3ab53e85071a5d32e769e	This statement is TRUE	Female15-clip7.mp3	40	Hearing	1	Control	Female	TRUE	TRUE
334	60c3ab53e85071a5d32e769e	This statement is TRUE	Female42-clip12.mp3	41	Hearing	1	Control	Female	TRUE	TRUE
335	60c3ab53e85071a5d32e769e	This statement is TRUE	Male24-clip21_3semitones_up.mp3	42	Hearing	1	Pitch	Male	TRUE	TRUE
336	60c3ab53e85071a5d32e769e	This statement is TRUE	Female42-clip2pause_control.mp3	43	Hearing	1	Pause	Female	TRUE	TRUE
337	60c3ab53e85071a5d32e769e	This statement is TRUE	Male36-clip13.mp3	44	Hearing	1	Control	Male	TRUE	TRUE
338	60c3ab53e85071a5d32e769e	This statement is TRUE	Female42-clip22_3semitones_up.mp3	45	Hearing	1	Pitch	Female	TRUE	TRUE
339	60c3ab53e85071a5d32e769e	This statement is a LIE	Female42-clip21.mp3	46	Hearing	1	Control	Female	Lie	FALSE
340	60c3ab53e85071a5d32e769e	This statement is TRUE	Female15-clip12pause_control.mp3	47	Hearing	1	Pause	Female	TRUE	TRUE
341	60c3ab53e85071a5d32e769e	This statement is TRUE	Male24-clip7pause_control.mp3	48	Hearing	1	Pause	Male	TRUE	TRUE
342	60c3ab53e85071a5d32e769e	This statement is TRUE	Male36-clip4.mp3	49	Hearing	1	Control	Male	TRUE	TRUE
343	60c3ab53e85071a5d32e769e	This statement is a LIE	Female42-clip20pause_control.mp3	50	Hearing	1	Pause	Female	Lie	FALSE
344	60c3ab53e85071a5d32e769e	This statement is TRUE	Female42-clip23pause_control.mp3	51	Hearing	1	Pause	Female	TRUE	TRUE
345	60c3ab53e85071a5d32e769e	This statement is a LIE	Male24-clip23.mp3	52	Hearing	1	Control	Male	Lie	FALSE
346	60c3ab53e85071a5d32e769e	This statement is a LIE	Female15-clip21pause_control.mp3	53	Hearing	1	Pause	Female	Lie	FALSE
347	60c3ab53e85071a5d32e769e	This statement is a LIE	Male36-clip15pause_control.mp3	54	Hearing	1	Pause	Male	Lie	FALSE
348	60c3ab53e85071a5d32e769e	This statement is a LIE	Female42-clip8pause_control.mp3	55	Hearing	1	Pause	Female	Lie	FALSE
349	60c3ab53e85071a5d32e769e	This statement is a LIE	Male24-clip8.mp3	56	Hearing	1	Control	Male	Lie	FALSE
350	60c3ab53e85071a5d32e769e	This statement is TRUE	Male36-clip5_3semitones_up.mp3	57	Hearing	1	Pitch	Male	TRUE	TRUE
351	60c3ab53e85071a5d32e769e	This statement is TRUE	Female15-clip9pause_control.mp3	58	Hearing	1	Pause	Female	TRUE	TRUE
352	60c3ab53e85071a5d32e769e	This statement is TRUE	Female42-clip11pause_control.mp3	60	Hearing	1	Pause	Female	TRUE	TRUE
353	60c3ab53e85071a5d32e769e	This statement is TRUE	Female15-clip10.mp3	61	Hearing	1	Control	Female	TRUE	TRUE
354	60c3ab53e85071a5d32e769e	This statement is a LIE	Male36-clip12pause_control.mp3	62	Hearing	1	Pause	Male	Lie	FALSE
355	60c3ab53e85071a5d32e769e	This statement is a LIE	Female15-clip4.mp3	63	Hearing	1	Control	Female	Lie	FALSE
356	60c3ab53e85071a5d32e769e	This statement is TRUE	Female42-clip19_3semitones_up.mp3	64	Hearing	1	Pitch	Female	TRUE	TRUE
357	60c3ab53e85071a5d32e769e	This statement is TRUE	Male36-clip11_3semitones_up.mp3	65	Hearing	1	Pitch	Male	TRUE	TRUE
358	60c3ab53e85071a5d32e769e	This statement is a LIE	Male24-clip14.mp3	66	Hearing	1	Control	Male	Lie	FALSE
359	60c3ab53e85071a5d32e769e	This statement is TRUE	Male36-clip7.mp3	67	Hearing	1	Control	Male	TRUE	TRUE
360	60c3ab53e85071a5d32e769e	This statement is a LIE	Male24-clip22pause_control.mp3	68	Hearing	1	Pause	Male	Lie	FALSE
361	60c3ab53e85071a5d32e769e	This statement is TRUE	Male36-clip9pause_control.mp3	69	Hearing	1	Pause	Male	TRUE	TRUE
362	60c3ab53e85071a5d32e769e	This statement is TRUE	Male36-clip19.mp3	70	Hearing	1	Control	Male	TRUE	TRUE
363	60c3ab53e85071a5d32e769e	This statement is a LIE	Male24-clip1pause_control.mp3	71	Hearing	1	Pause	Male	Lie	FALSE
364	60c3ab53e85071a5d32e769e	This statement is TRUE	Male36-clip22.mp3	72	Hearing	1	Control	Male	TRUE	TRUE
365	60c3ab53e85071a5d32e769e	This statement is TRUE	Female42-clip13_3semitones_up.mp3	73	Hearing	1	Pitch	Female	TRUE	TRUE
366	60c3ab53e85071a5d32e769e	This statement is TRUE	Female15-clip8_3semitones_up.mp3	74	Hearing	1	Pitch	Female	TRUE	TRUE
367	60c3ab53e85071a5d32e769e	This statement is TRUE	Female15-clip18pause_control.mp3	75	Hearing	1	Pause	Female	TRUE	TRUE
368	60c3ab53e85071a5d32e769e	This statement is TRUE	Male24-clip12_3semitones_up.mp3	76	Hearing	1	Pitch	Male	TRUE	TRUE
369	60c3ab53e85071a5d32e769e	This statement is TRUE	Female15-clip14_3semitones_up.mp3	77	Hearing	1	Pitch	Female	TRUE	TRUE
370	60c3ab53e85071a5d32e769e	This statement is TRUE	Male36-clip16.mp3	78	Hearing	1	Control	Male	TRUE	TRUE
371	60c3ab53e85071a5d32e769e	This statement is TRUE	Female15-clip19.mp3	79	Hearing	1	Control	Female	TRUE	TRUE
372	60c3ab53e85071a5d32e769e	This statement is TRUE	Male36-clip17_3semitones_up.mp3	80	Hearing	1	Pitch	Male	TRUE	TRUE
373	60c3ab53e85071a5d32e769e	This statement is TRUE	Male36-clip20_3semitones_up.mp3	81	Hearing	1	Pitch	Male	TRUE	TRUE
374	60c3ab53e85071a5d32e769e	This statement is TRUE	Male24-clip4pause_control.mp3	82	Hearing	1	Pause	Male	TRUE	TRUE
375	60c3ab53e85071a5d32e769e	This statement is a LIE	Male36-clip21pause_control.mp3	83	Hearing	1	Pause	Male	Lie	FALSE
376	60c3ab53e85071a5d32e769e	This statement is a LIE	Male24-clip20.mp3	84	Hearing	1	Control	Male	Lie	FALSE
377	60c3ab53e85071a5d32e769e	This statement is TRUE	Male24-clip15_3semitones_up.mp3	85	Hearing	1	Pitch	Male	TRUE	TRUE
378	60c3ab53e85071a5d32e769e	This statement is TRUE	Female15-clip25.mp3	86	Hearing	1	Control	Female	TRUE	TRUE
379	60c3ab53e85071a5d32e769e	This statement is TRUE	Male24-clip17.mp3	87	Hearing	1	Control	Male	TRUE	TRUE
380	60c3ab53e85071a5d32e769e	This statement is TRUE	Female42-clip25_3semitones_up.mp3	88	Hearing	1	Pitch	Female	TRUE	TRUE
381	60c3ab53e85071a5d32e769e	This statement is TRUE	Female42-clip24.mp3	90	Hearing	1	Control	Female	TRUE	TRUE
382	60c3ab53e85071a5d32e769e	This statement is TRUE	Male36-clip6pause_control.mp3	91	Hearing	1	Pause	Male	TRUE	TRUE
383	60c3ab53e85071a5d32e769e	This statement is TRUE	Female42-clip5pause_control.mp3	92	Hearing	1	Pause	Female	TRUE	TRUE
384	60c3ab53e85071a5d32e769e	This statement is TRUE	Female42-clip16_3semitones_up.mp3	93	Hearing	1	Pitch	Female	TRUE	TRUE
385	60c3ab53e85071a5d32e769e	This statement is TRUE	Male36-clip2_3semitones_up.mp3	94	Hearing	1	Pitch	Male	TRUE	TRUE
386	60c3ab53e85071a5d32e769e	This statement is TRUE	Male36-clip3pause_control.mp3	95	Hearing	1	Pause	Male	TRUE	TRUE
387	60c3ab53e85071a5d32e769e	This statement is a LIE	Female42-clip1_3semitones_up.mp3	96	Hearing	1	Pitch	Female	Lie	FALSE
388	60c3ab53e85071a5d32e769e	This statement is TRUE	Male24-clip2.mp3	97	Hearing	1	Control	Male	TRUE	TRUE
389	60c3ab53e85071a5d32e769e	This statement is TRUE	Male36-clip8_3semitones_up.mp3	98	Hearing	1	Pitch	Male	TRUE	TRUE
390	60c3ab53e85071a5d32e769e	This statement is TRUE	Female15-clip3pause_control.mp3	99	Hearing	1	Pause	Female	TRUE	TRUE
391	60c3ab53e85071a5d32e769e	This statement is TRUE	Female42-clip7_3semitones_up.mp3	100	Hearing	1	Pitch	Female	TRUE	TRUE
392	60c3ab53e85071a5d32e769e	This statement is TRUE	Male24-clip13pause_control.mp3	101	Hearing	1	Pause	Male	TRUE	TRUE
393	60c3ab53e85071a5d32e769e	This statement is a LIE	Male36-clip24pause_control.mp3	102	Hearing	1	Pause	Male	Lie	FALSE
394	60c3ab53e85071a5d32e769e	This statement is TRUE	Male24-clip11.mp3	103	Hearing	1	Control	Male	TRUE	TRUE
395	60c3ab53e85071a5d32e769e	This statement is TRUE	Male24-clip6_3semitones_up.mp3	104	Hearing	1	Pitch	Male	TRUE	TRUE
396	60c3ab53e85071a5d32e769e	This statement is TRUE	Male36-clip18pause_control.mp3	105	Hearing	1	Pause	Male	TRUE	TRUE
397	60c3ac37e5020225aba3e1b2	This statement is TRUE	Female15-clip1.mp3	1	Hearing	1	Control	Female	TRUE	TRUE
398	60c3ac37e5020225aba3e1b2	This statement is TRUE	Female15-clip16.mp3	2	Hearing	1	Control	Female	TRUE	TRUE
399	60c3ac37e5020225aba3e1b2	This statement is a LIE	Male36-clip24pause_control.mp3	3	Hearing	1	Pause	Male	Lie	FALSE
400	60c3ac37e5020225aba3e1b2	This statement is a LIE	Male36-clip15pause_control.mp3	4	Hearing	1	Pause	Male	Lie	FALSE
401	60c3ac37e5020225aba3e1b2	This statement is TRUE	Female42-clip7_3semitones_up.mp3	5	Hearing	1	Pitch	Female	TRUE	TRUE
402	60c3ac37e5020225aba3e1b2	This statement is TRUE	Female15-clip20_3semitones_up.mp3	6	Hearing	1	Pitch	Female	TRUE	TRUE
403	60c3ac37e5020225aba3e1b2	This statement is TRUE	Male24-clip14.mp3	7	Hearing	1	Control	Male	TRUE	TRUE
404	60c3ac37e5020225aba3e1b2	This statement is TRUE	Male24-clip1pause_control.mp3	8	Hearing	1	Pause	Male	TRUE	TRUE
405	60c3ac37e5020225aba3e1b2	This statement is TRUE	Male24-clip18_3semitones_up.mp3	9	Hearing	1	Pitch	Male	TRUE	TRUE
406	60c3ac37e5020225aba3e1b2	This statement is TRUE	Male36-clip21pause_control.mp3	10	Hearing	1	Pause	Male	TRUE	TRUE
407	60c3ac37e5020225aba3e1b2	This statement is a LIE	Female42-clip2pause_control.mp3	11	Hearing	1	Pause	Female	Lie	FALSE
408	60c3ac37e5020225aba3e1b2	This statement is a LIE	Female42-clip24.mp3	12	Hearing	1	Control	Female	Lie	FALSE
409	60c3ac37e5020225aba3e1b2	This statement is a LIE	Male24-clip10pause_control.mp3	13	Hearing	1	Pause	Male	Lie	FALSE
410	60c3ac37e5020225aba3e1b2	This statement is a LIE	Male24-clip4pause_control.mp3	14	Hearing	1	Pause	Male	Lie	FALSE
411	60c3ac37e5020225aba3e1b2	This statement is TRUE	Male36-clip23_3semitones_up.mp3	15	Hearing	1	Pitch	Male	TRUE	TRUE
412	60c3ac37e5020225aba3e1b2	This statement is a LIE	Female42-clip21.mp3	16	Hearing	1	Control	Female	Lie	FALSE
413	60c3ac37e5020225aba3e1b2	This statement is a LIE	Female15-clip22.mp3	17	Hearing	1	Control	Female	Lie	FALSE
414	60c3ac37e5020225aba3e1b2	This statement is a LIE	Female42-clip5pause_control.mp3	18	Hearing	1	Pause	Female	Lie	FALSE
415	60c3ac37e5020225aba3e1b2	This statement is TRUE	Female42-clip25_3semitones_up.mp3	19	Hearing	1	Pitch	Female	TRUE	TRUE
416	60c3ac37e5020225aba3e1b2	This statement is a LIE	Male24-clip19pause_control.mp3	20	Hearing	1	Pause	Male	Lie	FALSE
417	60c3ac37e5020225aba3e1b2	This statement is a LIE	Female42-clip3.mp3	21	Hearing	1	Control	Female	Lie	FALSE
418	60c3ac37e5020225aba3e1b2	This statement is a LIE	Male36-clip13.mp3	23	Hearing	1	Control	Male	Lie	FALSE
419	60c3ac37e5020225aba3e1b2	This statement is a LIE	Female42-clip22_3semitones_up.mp3	24	Hearing	1	Pitch	Female	Lie	FALSE
420	60c3ac37e5020225aba3e1b2	This statement is TRUE	Female42-clip8pause_control.mp3	25	Hearing	1	Pause	Female	TRUE	TRUE
421	60c3ac37e5020225aba3e1b2	This statement is TRUE	Female15-clip8_3semitones_up.mp3	26	Hearing	1	Pitch	Female	TRUE	TRUE
422	60c3ac37e5020225aba3e1b2	This statement is a LIE	Male36-clip22.mp3	27	Hearing	1	Control	Male	Lie	FALSE
423	60c3ac37e5020225aba3e1b2	This statement is a LIE	Female42-clip20pause_control.mp3	28	Hearing	1	Pause	Female	Lie	FALSE
424	60c3ac37e5020225aba3e1b2	This statement is a LIE	Female42-clip23pause_control.mp3	29	Hearing	1	Pause	Female	Lie	FALSE
425	60c3ac37e5020225aba3e1b2	This statement is TRUE	Male36-clip12pause_control.mp3	30	Hearing	1	Pause	Male	TRUE	TRUE
426	60c3ac37e5020225aba3e1b2	This statement is TRUE	Male36-clip8_3semitones_up.mp3	31	Hearing	1	Pitch	Male	TRUE	TRUE
427	60c3ac37e5020225aba3e1b2	This statement is TRUE	Female42-clip18.mp3	32	Hearing	1	Control	Female	TRUE	TRUE
428	60c3ac37e5020225aba3e1b2	This statement is TRUE	Female42-clip4_3semitones_up.mp3	34	Hearing	1	Pitch	Female	TRUE	TRUE
429	60c3ac37e5020225aba3e1b2	This statement is TRUE	Female42-clip16_3semitones_up.mp3	36	Hearing	1	Pitch	Female	TRUE	TRUE
430	60c3ac37e5020225aba3e1b2	This statement is a LIE	Female42-clip14pause_control.mp3	37	Hearing	1	Pause	Female	Lie	FALSE
431	60c3ac37e5020225aba3e1b2	This statement is a LIE	Male24-clip3_3semitones_up.mp3	38	Hearing	1	Pitch	Male	Lie	FALSE
432	60c3ac37e5020225aba3e1b2	This statement is TRUE	Male36-clip18pause_control.mp3	39	Hearing	1	Pause	Male	TRUE	TRUE
433	60c3ac37e5020225aba3e1b2	This statement is TRUE	Male36-clip5_3semitones_up.mp3	40	Hearing	1	Pitch	Male	TRUE	TRUE
434	60c3ac37e5020225aba3e1b2	This statement is a LIE	Female42-clip10_3semitones_up.mp3	41	Hearing	1	Pitch	Female	Lie	FALSE
435	60c3ac37e5020225aba3e1b2	This statement is TRUE	Female15-clip19.mp3	42	Hearing	1	Control	Female	TRUE	TRUE
436	60c3ac37e5020225aba3e1b2	This statement is TRUE	Male36-clip7.mp3	43	Hearing	1	Control	Male	TRUE	TRUE
437	60c3ac37e5020225aba3e1b2	This statement is a LIE	Male36-clip9pause_control.mp3	44	Hearing	1	Pause	Male	Lie	FALSE
438	60c3ac37e5020225aba3e1b2	This statement is TRUE	Female15-clip25.mp3	45	Hearing	1	Control	Female	TRUE	TRUE
439	60c3ac37e5020225aba3e1b2	This statement is a LIE	Female15-clip4.mp3	46	Hearing	1	Control	Female	Lie	FALSE
440	60c3ac37e5020225aba3e1b2	This statement is TRUE	Female42-clip17pause_control.mp3	47	Hearing	1	Pause	Female	TRUE	TRUE
441	60c3ac37e5020225aba3e1b2	This statement is TRUE	Male24-clip13pause_control.mp3	48	Hearing	1	Pause	Male	TRUE	TRUE
442	60c3ac37e5020225aba3e1b2	This statement is a LIE	Female15-clip15pauses_control.mp3	49	Hearing	1	Pause	Female	Lie	FALSE
443	60c3ac37e5020225aba3e1b2	This statement is TRUE	Female42-clip19_3semitones_up.mp3	50	Hearing	1	Pitch	Female	TRUE	TRUE
444	60c3ac37e5020225aba3e1b2	This statement is TRUE	Female15-clip14_3semitones_up.mp3	51	Hearing	1	Pitch	Female	TRUE	TRUE
445	60c3ac37e5020225aba3e1b2	This statement is a LIE	Male24-clip24_3semitones_up.mp3	52	Hearing	1	Pitch	Male	Lie	FALSE
446	60c3ac37e5020225aba3e1b2	This statement is a LIE	Female42-clip15.mp3	53	Hearing	1	Control	Female	Lie	FALSE
447	60c3ac37e5020225aba3e1b2	This statement is a LIE	Female42-clip13_3semitones_up.mp3	54	Hearing	1	Pitch	Female	Lie	FALSE
448	60c3ac37e5020225aba3e1b2	This statement is a LIE	Female15-clip23_3semitones_up.mp3	55	Hearing	1	Pitch	Female	Lie	FALSE
449	60c3ac37e5020225aba3e1b2	This statement is TRUE	Male24-clip6_3semitones_up.mp3	56	Hearing	1	Pitch	Male	TRUE	TRUE
450	60c3ac37e5020225aba3e1b2	This statement is a LIE	Male36-clip19.mp3	57	Hearing	1	Control	Male	Lie	FALSE
451	60c3ac37e5020225aba3e1b2	This statement is a LIE	Female15-clip12pause_control.mp3	58	Hearing	1	Pause	Female	Lie	FALSE
452	60c3ac37e5020225aba3e1b2	This statement is TRUE	Male24-clip9_3semitones_up.mp3	59	Hearing	1	Pitch	Male	TRUE	TRUE
453	60c3ac37e5020225aba3e1b2	This statement is a LIE	Male24-clip15_3semitones_up.mp3	60	Hearing	1	Pitch	Male	Lie	FALSE
454	60c3ac37e5020225aba3e1b2	This statement is a LIE	Male24-clip21_3semitones_up.mp3	61	Hearing	1	Pitch	Male	Lie	FALSE
455	60c3ac37e5020225aba3e1b2	This statement is a LIE	Female42-clip11pause_control.mp3	62	Hearing	1	Pause	Female	Lie	FALSE
456	60c3ac37e5020225aba3e1b2	This statement is a LIE	Female42-clip9.mp3	63	Hearing	1	Control	Female	Lie	FALSE
457	60c3ac37e5020225aba3e1b2	This statement is TRUE	Male24-clip12_3semitones_up.mp3	65	Hearing	1	Pitch	Male	TRUE	TRUE
458	60c3ac37e5020225aba3e1b2	This statement is TRUE	Female15-clip2_3semitones_up.mp3	66	Hearing	1	Pitch	Female	TRUE	TRUE
459	60c3ac37e5020225aba3e1b2	This statement is TRUE	Female15-clip21pause_control.mp3	67	Hearing	1	Pause	Female	TRUE	TRUE
460	60c3ac37e5020225aba3e1b2	This statement is TRUE	Male24-clip16pause_control.mp3	68	Hearing	1	Pause	Male	TRUE	TRUE
461	60c3ac37e5020225aba3e1b2	This statement is TRUE	Female15-clip10.mp3	69	Hearing	1	Control	Female	TRUE	TRUE
462	60c3ac37e5020225aba3e1b2	This statement is a LIE	Female15-clip7.mp3	70	Hearing	1	Control	Female	Lie	FALSE
463	60c3ac37e5020225aba3e1b2	This statement is a LIE	Male24-clip20.mp3	71	Hearing	1	Control	Male	Lie	FALSE
464	60c3ac37e5020225aba3e1b2	This statement is a LIE	Male24-clip2.mp3	72	Hearing	1	Control	Male	Lie	FALSE
465	60c3ac37e5020225aba3e1b2	This statement is TRUE	Female15-clip17_3semitones_up.mp3	73	Hearing	1	Pitch	Female	TRUE	TRUE
466	60c3ac37e5020225aba3e1b2	This statement is TRUE	Male36-clip11_3semitones_up.mp3	74	Hearing	1	Pitch	Male	TRUE	TRUE
467	60c3ac37e5020225aba3e1b2	This statement is TRUE	Male36-clip16.mp3	75	Hearing	1	Control	Male	TRUE	TRUE
468	60c3ac37e5020225aba3e1b2	This statement is a LIE	Male24-clip5.mp3	76	Hearing	1	Control	Male	Lie	FALSE
469	60c3ac37e5020225aba3e1b2	This statement is TRUE	Male36-clip14_3semitones_up.mp3	77	Hearing	1	Pitch	Male	TRUE	TRUE
470	60c3ac37e5020225aba3e1b2	This statement is TRUE	Female15-clip13.mp3	78	Hearing	1	Control	Female	TRUE	TRUE
471	60c3ac37e5020225aba3e1b2	This statement is TRUE	Female15-clip11_3semitones_up.mp3	79	Hearing	1	Pitch	Female	TRUE	TRUE
472	60c3ac37e5020225aba3e1b2	This statement is a LIE	Female15-clip24pause_control.mp3	80	Hearing	1	Pause	Female	Lie	FALSE
473	60c3ac37e5020225aba3e1b2	This statement is a LIE	Male36-clip6pause_control.mp3	81	Hearing	1	Pause	Male	Lie	FALSE
474	60c3ac37e5020225aba3e1b2	This statement is TRUE	Male36-clip3pause_control.mp3	82	Hearing	1	Pause	Male	TRUE	TRUE
475	60c3ac37e5020225aba3e1b2	This statement is a LIE	Male24-clip25pause_control.mp3	83	Hearing	1	Pause	Male	Lie	FALSE
476	60c3ac37e5020225aba3e1b2	This statement is a LIE	Female15-clip18pause_control.mp3	84	Hearing	1	Pause	Female	Lie	FALSE
477	60c3ac37e5020225aba3e1b2	This statement is a LIE	Female15-clip6pause_control.mp3	85	Hearing	1	Pause	Female	Lie	FALSE
478	60c3ac37e5020225aba3e1b2	This statement is TRUE	Male36-clip10.mp3	86	Hearing	1	Control	Male	TRUE	TRUE
479	60c3ac37e5020225aba3e1b2	This statement is TRUE	Male24-clip17.mp3	88	Hearing	1	Control	Male	TRUE	TRUE
480	60c3ac37e5020225aba3e1b2	This statement is TRUE	Male24-clip8.mp3	89	Hearing	1	Control	Male	TRUE	TRUE
481	60c3ac37e5020225aba3e1b2	This statement is TRUE	Female42-clip6.mp3	90	Hearing	1	Control	Female	TRUE	TRUE
482	60c3ac37e5020225aba3e1b2	This statement is TRUE	Female15-clip5_3semitones_up.mp3	91	Hearing	1	Pitch	Female	TRUE	TRUE
483	60c3ac37e5020225aba3e1b2	This statement is TRUE	Male36-clip20_3semitones_up.mp3	92	Hearing	1	Pitch	Male	TRUE	TRUE
484	60c3ac37e5020225aba3e1b2	This statement is TRUE	Female42-clip1_3semitones_up.mp3	93	Hearing	1	Pitch	Female	TRUE	TRUE
485	60c3ac37e5020225aba3e1b2	This statement is TRUE	Male36-clip2_3semitones_up.mp3	94	Hearing	1	Pitch	Male	TRUE	TRUE
486	60c3ac37e5020225aba3e1b2	This statement is TRUE	Male36-clip1.mp3	95	Hearing	1	Control	Male	TRUE	TRUE
487	60c3ac37e5020225aba3e1b2	This statement is TRUE	Male24-clip23.mp3	96	Hearing	1	Control	Male	TRUE	TRUE
488	60c3ac37e5020225aba3e1b2	This statement is a LIE	Female15-clip3pause_control.mp3	97	Hearing	1	Pause	Female	Lie	FALSE
489	60c3ac37e5020225aba3e1b2	This statement is a LIE	Female15-clip9pause_control.mp3	98	Hearing	1	Pause	Female	Lie	FALSE
490	60c3ac37e5020225aba3e1b2	This statement is TRUE	Male24-clip11.mp3	99	Hearing	1	Control	Male	TRUE	TRUE
491	60c3ac37e5020225aba3e1b2	This statement is a LIE	Male36-clip4.mp3	100	Hearing	1	Control	Male	Lie	FALSE
492	60c3ac37e5020225aba3e1b2	This statement is TRUE	Male24-clip22pause_control.mp3	101	Hearing	1	Pause	Male	TRUE	TRUE
493	60c3ac37e5020225aba3e1b2	This statement is TRUE	Male24-clip7pause_control.mp3	103	Hearing	1	Pause	Male	TRUE	TRUE
494	60c3ac37e5020225aba3e1b2	This statement is TRUE	Male36-clip17_3semitones_up.mp3	104	Hearing	1	Pitch	Male	TRUE	TRUE
495	60c3ac37e5020225aba3e1b2	This statement is TRUE	Female42-clip12.mp3	105	Hearing	1	Control	Female	TRUE	TRUE
496	60c3acc21070157db07e896e	This statement is TRUE	Female15-clip1.mp3	1	Hearing	1	Control	Female	TRUE	TRUE
497	60c3acc21070157db07e896e	This statement is TRUE	Female42-clip17pause_control.mp3	2	Hearing	1	Pause	Female	TRUE	TRUE
498	60c3acc21070157db07e896e	This statement is TRUE	Female42-clip8pause_control.mp3	3	Hearing	1	Pause	Female	TRUE	TRUE
499	60c3acc21070157db07e896e	This statement is TRUE	Female15-clip12pause_control.mp3	4	Hearing	1	Pause	Female	TRUE	TRUE
500	60c3acc21070157db07e896e	This statement is TRUE	Female42-clip1_3semitones_up.mp3	5	Hearing	1	Pitch	Female	TRUE	TRUE
501	60c3acc21070157db07e896e	This statement is a LIE	Male36-clip4.mp3	6	Hearing	1	Control	Male	Lie	FALSE
502	60c3acc21070157db07e896e	This statement is a LIE	Male36-clip15pause_control.mp3	7	Hearing	1	Pause	Male	Lie	FALSE
503	60c3acc21070157db07e896e	This statement is TRUE	Male24-clip18_3semitones_up.mp3	8	Hearing	1	Pitch	Male	TRUE	TRUE
504	60c3acc21070157db07e896e	This statement is TRUE	Male24-clip25pause_control.mp3	9	Hearing	1	Pause	Male	TRUE	TRUE
505	60c3acc21070157db07e896e	This statement is a LIE	Male24-clip15_3semitones_up.mp3	10	Hearing	1	Pitch	Male	Lie	FALSE
506	60c3acc21070157db07e896e	This statement is TRUE	Male24-clip3_3semitones_up.mp3	11	Hearing	1	Pitch	Male	TRUE	TRUE
507	60c3acc21070157db07e896e	This statement is TRUE	Female15-clip9pause_control.mp3	12	Hearing	1	Pause	Female	TRUE	TRUE
508	60c3acc21070157db07e896e	This statement is TRUE	Male24-clip9_3semitones_up.mp3	13	Hearing	1	Pitch	Male	TRUE	TRUE
509	60c3acc21070157db07e896e	This statement is TRUE	Female15-clip14_3semitones_up.mp3	14	Hearing	1	Pitch	Female	TRUE	TRUE
510	60c3acc21070157db07e896e	This statement is a LIE	Male36-clip21pause_control.mp3	15	Hearing	1	Pause	Male	Lie	FALSE
511	60c3acc21070157db07e896e	This statement is TRUE	Female42-clip12.mp3	16	Hearing	1	Control	Female	TRUE	TRUE
512	60c3acc21070157db07e896e	This statement is TRUE	Male36-clip22.mp3	17	Hearing	1	Control	Male	TRUE	TRUE
513	60c3acc21070157db07e896e	This statement is a LIE	Male36-clip20_3semitones_up.mp3	18	Hearing	1	Pitch	Male	Lie	FALSE
514	60c3acc21070157db07e896e	This statement is TRUE	Male36-clip16.mp3	19	Hearing	1	Control	Male	TRUE	TRUE
515	60c3acc21070157db07e896e	This statement is TRUE	Male24-clip16pause_control.mp3	20	Hearing	1	Pause	Male	TRUE	TRUE
516	60c3acc21070157db07e896e	This statement is TRUE	Female42-clip18.mp3	21	Hearing	1	Control	Female	TRUE	TRUE
517	60c3acc21070157db07e896e	This statement is a LIE	Female15-clip13.mp3	22	Hearing	1	Control	Female	Lie	FALSE
518	60c3acc21070157db07e896e	This statement is a LIE	Male36-clip2_3semitones_up.mp3	24	Hearing	1	Pitch	Male	Lie	FALSE
519	60c3acc21070157db07e896e	This statement is a LIE	Male24-clip10pause_control.mp3	25	Hearing	1	Pause	Male	Lie	FALSE
520	60c3acc21070157db07e896e	This statement is a LIE	Female15-clip6pause_control.mp3	26	Hearing	1	Pause	Female	Lie	FALSE
521	60c3acc21070157db07e896e	This statement is a LIE	Male36-clip23_3semitones_up.mp3	27	Hearing	1	Pitch	Male	Lie	FALSE
522	60c3acc21070157db07e896e	This statement is a LIE	Male36-clip17_3semitones_up.mp3	28	Hearing	1	Pitch	Male	Lie	FALSE
523	60c3acc21070157db07e896e	This statement is a LIE	Female15-clip5_3semitones_up.mp3	29	Hearing	1	Pitch	Female	Lie	FALSE
524	60c3acc21070157db07e896e	This statement is TRUE	Female42-clip10_3semitones_up.mp3	30	Hearing	1	Pitch	Female	TRUE	TRUE
525	60c3acc21070157db07e896e	This statement is TRUE	Female15-clip16.mp3	31	Hearing	1	Control	Female	TRUE	TRUE
526	60c3acc21070157db07e896e	This statement is a LIE	Female15-clip21pause_control.mp3	32	Hearing	1	Pause	Female	Lie	FALSE
527	60c3acc21070157db07e896e	This statement is TRUE	Male36-clip7.mp3	33	Hearing	1	Control	Male	TRUE	TRUE
528	60c3acc21070157db07e896e	This statement is a LIE	Male36-clip13.mp3	34	Hearing	1	Control	Male	Lie	FALSE
529	60c3acc21070157db07e896e	This statement is a LIE	Female42-clip16_3semitones_up.mp3	35	Hearing	1	Pitch	Female	Lie	FALSE
530	60c3acc21070157db07e896e	This statement is TRUE	Male24-clip5.mp3	36	Hearing	1	Control	Male	TRUE	TRUE
531	60c3acc21070157db07e896e	This statement is a LIE	Male36-clip10.mp3	37	Hearing	1	Control	Male	Lie	FALSE
532	60c3acc21070157db07e896e	This statement is a LIE	Female15-clip22.mp3	38	Hearing	1	Control	Female	Lie	FALSE
533	60c3acc21070157db07e896e	This statement is a LIE	Female42-clip3.mp3	39	Hearing	1	Control	Female	Lie	FALSE
534	60c3acc21070157db07e896e	This statement is TRUE	Female42-clip5pause_control.mp3	40	Hearing	1	Pause	Female	TRUE	TRUE
535	60c3acc21070157db07e896e	This statement is a LIE	Male24-clip6_3semitones_up.mp3	41	Hearing	1	Pitch	Male	Lie	FALSE
536	60c3acc21070157db07e896e	This statement is a LIE	Female15-clip18pause_control.mp3	42	Hearing	1	Pause	Female	Lie	FALSE
537	60c3acc21070157db07e896e	This statement is TRUE	Female15-clip2_3semitones_up.mp3	43	Hearing	1	Pitch	Female	TRUE	TRUE
538	60c3acc21070157db07e896e	This statement is TRUE	Female15-clip4.mp3	44	Hearing	1	Control	Female	TRUE	TRUE
539	60c3acc21070157db07e896e	This statement is a LIE	Male36-clip6pause_control.mp3	45	Hearing	1	Pause	Male	Lie	FALSE
540	60c3acc21070157db07e896e	This statement is a LIE	Male24-clip8.mp3	46	Hearing	1	Control	Male	Lie	FALSE
541	60c3acc21070157db07e896e	This statement is TRUE	Female42-clip22_3semitones_up.mp3	47	Hearing	1	Pitch	Female	TRUE	TRUE
542	60c3acc21070157db07e896e	This statement is TRUE	Female42-clip4_3semitones_up.mp3	48	Hearing	1	Pitch	Female	TRUE	TRUE
543	60c3acc21070157db07e896e	This statement is TRUE	Male36-clip1.mp3	49	Hearing	1	Control	Male	TRUE	TRUE
544	60c3acc21070157db07e896e	This statement is TRUE	Female42-clip15.mp3	50	Hearing	1	Control	Female	TRUE	TRUE
545	60c3acc21070157db07e896e	This statement is a LIE	Female15-clip15pauses_control.mp3	51	Hearing	1	Pause	Female	Lie	FALSE
546	60c3acc21070157db07e896e	This statement is a LIE	Male24-clip7pause_control.mp3	52	Hearing	1	Pause	Male	Lie	FALSE
547	60c3acc21070157db07e896e	This statement is a LIE	Male36-clip9pause_control.mp3	53	Hearing	1	Pause	Male	Lie	FALSE
548	60c3acc21070157db07e896e	This statement is a LIE	Male24-clip4pause_control.mp3	54	Hearing	1	Pause	Male	Lie	FALSE
549	60c3acc21070157db07e896e	This statement is TRUE	Female15-clip17_3semitones_up.mp3	55	Hearing	1	Pitch	Female	TRUE	TRUE
550	60c3acc21070157db07e896e	This statement is TRUE	Male24-clip23.mp3	56	Hearing	1	Control	Male	TRUE	TRUE
551	60c3acc21070157db07e896e	This statement is TRUE	Male36-clip14_3semitones_up.mp3	57	Hearing	1	Pitch	Male	TRUE	TRUE
552	60c3acc21070157db07e896e	This statement is a LIE	Female15-clip3pause_control.mp3	58	Hearing	1	Pause	Female	Lie	FALSE
553	60c3acc21070157db07e896e	This statement is a LIE	Female15-clip24pause_control.mp3	59	Hearing	1	Pause	Female	Lie	FALSE
554	60c3acc21070157db07e896e	This statement is a LIE	Female42-clip11pause_control.mp3	60	Hearing	1	Pause	Female	Lie	FALSE
555	60c3acc21070157db07e896e	This statement is TRUE	Female15-clip20_3semitones_up.mp3	61	Hearing	1	Pitch	Female	TRUE	TRUE
556	60c3acc21070157db07e896e	This statement is TRUE	Female42-clip25_3semitones_up.mp3	63	Hearing	1	Pitch	Female	TRUE	TRUE
557	60c3acc21070157db07e896e	This statement is a LIE	Female42-clip24.mp3	64	Hearing	1	Control	Female	Lie	FALSE
558	60c3acc21070157db07e896e	This statement is TRUE	Female15-clip10.mp3	65	Hearing	1	Control	Female	TRUE	TRUE
559	60c3acc21070157db07e896e	This statement is TRUE	Female15-clip25.mp3	66	Hearing	1	Control	Female	TRUE	TRUE
560	60c3acc21070157db07e896e	This statement is a LIE	Female42-clip2pause_control.mp3	67	Hearing	1	Pause	Female	Lie	FALSE
561	60c3acc21070157db07e896e	This statement is a LIE	Female15-clip7.mp3	68	Hearing	1	Control	Female	Lie	FALSE
562	60c3acc21070157db07e896e	This statement is a LIE	Female42-clip21.mp3	69	Hearing	1	Control	Female	Lie	FALSE
563	60c3acc21070157db07e896e	This statement is TRUE	Male24-clip22pause_control.mp3	70	Hearing	1	Pause	Male	TRUE	TRUE
564	60c3acc21070157db07e896e	This statement is TRUE	Female42-clip23pause_control.mp3	71	Hearing	1	Pause	Female	TRUE	TRUE
565	60c3acc21070157db07e896e	This statement is TRUE	Male24-clip19pause_control.mp3	72	Hearing	1	Pause	Male	TRUE	TRUE
566	60c3acc21070157db07e896e	This statement is TRUE	Female15-clip19.mp3	73	Hearing	1	Control	Female	TRUE	TRUE
567	60c3acc21070157db07e896e	This statement is TRUE	Female42-clip9.mp3	74	Hearing	1	Control	Female	TRUE	TRUE
568	60c3acc21070157db07e896e	This statement is TRUE	Male36-clip19.mp3	75	Hearing	1	Control	Male	TRUE	TRUE
569	60c3acc21070157db07e896e	This statement is a LIE	Male24-clip12_3semitones_up.mp3	76	Hearing	1	Pitch	Male	Lie	FALSE
570	60c3acc21070157db07e896e	This statement is TRUE	Male36-clip24pause_control.mp3	79	Hearing	1	Pause	Male	TRUE	TRUE
571	60c3acc21070157db07e896e	This statement is TRUE	Male36-clip5_3semitones_up.mp3	80	Hearing	1	Pitch	Male	TRUE	TRUE
572	60c3acc21070157db07e896e	This statement is a LIE	Male24-clip1pause_control.mp3	82	Hearing	1	Pause	Male	Lie	FALSE
573	60c3acc21070157db07e896e	This statement is a LIE	Male36-clip11_3semitones_up.mp3	83	Hearing	1	Pitch	Male	Lie	FALSE
574	60c3acc21070157db07e896e	This statement is TRUE	Female42-clip7_3semitones_up.mp3	84	Hearing	1	Pitch	Female	TRUE	TRUE
575	60c3acc21070157db07e896e	This statement is TRUE	Male24-clip17.mp3	85	Hearing	1	Control	Male	TRUE	TRUE
576	60c3acc21070157db07e896e	This statement is TRUE	Male24-clip11.mp3	86	Hearing	1	Control	Male	TRUE	TRUE
577	60c3acc21070157db07e896e	This statement is a LIE	Male36-clip18pause_control.mp3	87	Hearing	1	Pause	Male	Lie	FALSE
578	60c3acc21070157db07e896e	This statement is TRUE	Male24-clip20.mp3	88	Hearing	1	Control	Male	TRUE	TRUE
579	60c3acc21070157db07e896e	This statement is a LIE	Male24-clip13pause_control.mp3	89	Hearing	1	Pause	Male	Lie	FALSE
580	60c3acc21070157db07e896e	This statement is a LIE	Male24-clip21_3semitones_up.mp3	90	Hearing	1	Pitch	Male	Lie	FALSE
581	60c3acc21070157db07e896e	This statement is TRUE	Male36-clip3pause_control.mp3	91	Hearing	1	Pause	Male	TRUE	TRUE
582	60c3acc21070157db07e896e	This statement is a LIE	Male36-clip8_3semitones_up.mp3	92	Hearing	1	Pitch	Male	Lie	FALSE
583	60c3acc21070157db07e896e	This statement is a LIE	Female42-clip20pause_control.mp3	93	Hearing	1	Pause	Female	Lie	FALSE
584	60c3acc21070157db07e896e	This statement is TRUE	Female42-clip6.mp3	94	Hearing	1	Control	Female	TRUE	TRUE
585	60c3acc21070157db07e896e	This statement is a LIE	Female42-clip19_3semitones_up.mp3	95	Hearing	1	Pitch	Female	Lie	FALSE
586	60c3acc21070157db07e896e	This statement is TRUE	Female15-clip23_3semitones_up.mp3	96	Hearing	1	Pitch	Female	TRUE	TRUE
587	60c3acc21070157db07e896e	This statement is TRUE	Male24-clip2.mp3	97	Hearing	1	Control	Male	TRUE	TRUE
588	60c3acc21070157db07e896e	This statement is TRUE	Male24-clip14.mp3	98	Hearing	1	Control	Male	TRUE	TRUE
589	60c3acc21070157db07e896e	This statement is TRUE	Female42-clip13_3semitones_up.mp3	99	Hearing	1	Pitch	Female	TRUE	TRUE
590	60c3acc21070157db07e896e	This statement is a LIE	Male36-clip12pause_control.mp3	100	Hearing	1	Pause	Male	Lie	FALSE
591	60c3acc21070157db07e896e	This statement is a LIE	Female15-clip8_3semitones_up.mp3	101	Hearing	1	Pitch	Female	Lie	FALSE
592	60c3acc21070157db07e896e	This statement is TRUE	Male24-clip24_3semitones_up.mp3	102	Hearing	1	Pitch	Male	TRUE	TRUE
593	60c3acc21070157db07e896e	This statement is TRUE	Female15-clip11_3semitones_up.mp3	103	Hearing	1	Pitch	Female	TRUE	TRUE
594	60c3acc21070157db07e896e	This statement is a LIE	Female42-clip14pause_control.mp3	105	Hearing	1	Pause	Female	Lie	FALSE
595	60c3ad5bc312abac163feccb	This statement is TRUE	Female15-clip1.mp3	1	Hearing	1	Control	Female	TRUE	TRUE
596	60c3ad5bc312abac163feccb	This statement is TRUE	Male36-clip13.mp3	2	Hearing	1	Control	Male	TRUE	TRUE
597	60c3ad5bc312abac163feccb	This statement is TRUE	Male24-clip2.mp3	3	Hearing	1	Control	Male	TRUE	TRUE
598	60c3ad5bc312abac163feccb	This statement is a LIE	Male24-clip19pause_control.mp3	4	Hearing	1	Pause	Male	Lie	FALSE
599	60c3ad5bc312abac163feccb	This statement is a LIE	Female42-clip3.mp3	5	Hearing	1	Control	Female	Lie	FALSE
600	60c3ad5bc312abac163feccb	This statement is TRUE	Male24-clip15_3semitones_up.mp3	6	Hearing	1	Pitch	Male	TRUE	TRUE
601	60c3ad5bc312abac163feccb	This statement is a LIE	Female42-clip10_3semitones_up.mp3	7	Hearing	1	Pitch	Female	Lie	FALSE
602	60c3ad5bc312abac163feccb	This statement is TRUE	Male24-clip1pause_control.mp3	8	Hearing	1	Pause	Male	TRUE	TRUE
603	60c3ad5bc312abac163feccb	This statement is TRUE	Female42-clip14pause_control.mp3	9	Hearing	1	Pause	Female	TRUE	TRUE
604	60c3ad5bc312abac163feccb	This statement is TRUE	Female15-clip24pause_control.mp3	10	Hearing	1	Pause	Female	TRUE	TRUE
605	60c3ad5bc312abac163feccb	This statement is TRUE	Male24-clip23.mp3	11	Hearing	1	Control	Male	TRUE	TRUE
606	60c3ad5bc312abac163feccb	This statement is TRUE	Male36-clip9pause_control.mp3	12	Hearing	1	Pause	Male	TRUE	TRUE
607	60c3ad5bc312abac163feccb	This statement is TRUE	Female42-clip11pause_control.mp3	13	Hearing	1	Pause	Female	TRUE	TRUE
608	60c3ad5bc312abac163feccb	This statement is a LIE	Male24-clip21_3semitones_up.mp3	14	Hearing	1	Pitch	Male	Lie	FALSE
609	60c3ad5bc312abac163feccb	This statement is TRUE	Male24-clip7pause_control.mp3	15	Hearing	1	Pause	Male	TRUE	TRUE
610	60c3ad5bc312abac163feccb	This statement is TRUE	Female15-clip25.mp3	16	Hearing	1	Control	Female	TRUE	TRUE
611	60c3ad5bc312abac163feccb	This statement is a LIE	Female15-clip13.mp3	17	Hearing	1	Control	Female	Lie	FALSE
612	60c3ad5bc312abac163feccb	This statement is a LIE	Female15-clip3pause_control.mp3	18	Hearing	1	Pause	Female	Lie	FALSE
613	60c3ad5bc312abac163feccb	This statement is TRUE	Female42-clip4_3semitones_up.mp3	19	Hearing	1	Pitch	Female	TRUE	TRUE
614	60c3ad5bc312abac163feccb	This statement is TRUE	Female42-clip6.mp3	20	Hearing	1	Control	Female	TRUE	TRUE
615	60c3ad5bc312abac163feccb	This statement is TRUE	Male36-clip11_3semitones_up.mp3	21	Hearing	1	Pitch	Male	TRUE	TRUE
616	60c3ad5bc312abac163feccb	This statement is TRUE	Male36-clip14_3semitones_up.mp3	22	Hearing	1	Pitch	Male	TRUE	TRUE
617	60c3ad5bc312abac163feccb	This statement is a LIE	Male36-clip17_3semitones_up.mp3	23	Hearing	1	Pitch	Male	Lie	FALSE
618	60c3ad5bc312abac163feccb	This statement is TRUE	Male24-clip25pause_control.mp3	24	Hearing	1	Pause	Male	TRUE	TRUE
619	60c3ad5bc312abac163feccb	This statement is a LIE	Male24-clip16pause_control.mp3	25	Hearing	1	Pause	Male	Lie	FALSE
620	60c3ad5bc312abac163feccb	This statement is TRUE	Female42-clip23pause_control.mp3	26	Hearing	1	Pause	Female	TRUE	TRUE
621	60c3ad5bc312abac163feccb	This statement is TRUE	Male36-clip5_3semitones_up.mp3	27	Hearing	1	Pitch	Male	TRUE	TRUE
622	60c3ad5bc312abac163feccb	This statement is TRUE	Male36-clip12pause_control.mp3	28	Hearing	1	Pause	Male	TRUE	TRUE
623	60c3ad5bc312abac163feccb	This statement is a LIE	Female42-clip16_3semitones_up.mp3	29	Hearing	1	Pitch	Female	Lie	FALSE
624	60c3ad5bc312abac163feccb	This statement is TRUE	Female15-clip10.mp3	30	Hearing	1	Control	Female	TRUE	TRUE
625	60c3ad5bc312abac163feccb	This statement is TRUE	Female42-clip12.mp3	31	Hearing	1	Control	Female	TRUE	TRUE
626	60c3ad5bc312abac163feccb	This statement is a LIE	Male24-clip22pause_control.mp3	32	Hearing	1	Pause	Male	Lie	FALSE
627	60c3ad5bc312abac163feccb	This statement is TRUE	Male36-clip2_3semitones_up.mp3	33	Hearing	1	Pitch	Male	TRUE	TRUE
628	60c3ad5bc312abac163feccb	This statement is TRUE	Male36-clip4.mp3	34	Hearing	1	Control	Male	TRUE	TRUE
629	60c3ad5bc312abac163feccb	This statement is TRUE	Female15-clip7.mp3	35	Hearing	1	Control	Female	TRUE	TRUE
630	60c3ad5bc312abac163feccb	This statement is TRUE	Male36-clip23_3semitones_up.mp3	37	Hearing	1	Pitch	Male	TRUE	TRUE
631	60c3ad5bc312abac163feccb	This statement is a LIE	Female15-clip2_3semitones_up.mp3	39	Hearing	1	Pitch	Female	Lie	FALSE
632	60c3ad5bc312abac163feccb	This statement is TRUE	Female15-clip20_3semitones_up.mp3	40	Hearing	1	Pitch	Female	TRUE	TRUE
633	60c3ad5bc312abac163feccb	This statement is TRUE	Female42-clip7_3semitones_up.mp3	41	Hearing	1	Pitch	Female	TRUE	TRUE
634	60c3ad5bc312abac163feccb	This statement is TRUE	Female15-clip14_3semitones_up.mp3	42	Hearing	1	Pitch	Female	TRUE	TRUE
635	60c3ad5bc312abac163feccb	This statement is a LIE	Female42-clip21.mp3	43	Hearing	1	Control	Female	Lie	FALSE
636	60c3ad5bc312abac163feccb	This statement is TRUE	Male24-clip17.mp3	44	Hearing	1	Control	Male	TRUE	TRUE
637	60c3ad5bc312abac163feccb	This statement is a LIE	Male24-clip20.mp3	45	Hearing	1	Control	Male	Lie	FALSE
638	60c3ad5bc312abac163feccb	This statement is TRUE	Female42-clip20pause_control.mp3	46	Hearing	1	Pause	Female	TRUE	TRUE
639	60c3ad5bc312abac163feccb	This statement is TRUE	Female42-clip1_3semitones_up.mp3	47	Hearing	1	Pitch	Female	TRUE	TRUE
640	60c3ad5bc312abac163feccb	This statement is TRUE	Female15-clip5_3semitones_up.mp3	48	Hearing	1	Pitch	Female	TRUE	TRUE
641	60c3ad5bc312abac163feccb	This statement is TRUE	Female15-clip8_3semitones_up.mp3	49	Hearing	1	Pitch	Female	TRUE	TRUE
642	60c3ad5bc312abac163feccb	This statement is TRUE	Male36-clip3pause_control.mp3	50	Hearing	1	Pause	Male	TRUE	TRUE
643	60c3ad5bc312abac163feccb	This statement is TRUE	Male24-clip5.mp3	51	Hearing	1	Control	Male	TRUE	TRUE
644	60c3ad5bc312abac163feccb	This statement is a LIE	Female42-clip5pause_control.mp3	52	Hearing	1	Pause	Female	Lie	FALSE
645	60c3ad5bc312abac163feccb	This statement is TRUE	Female15-clip6pause_control.mp3	53	Hearing	1	Pause	Female	TRUE	TRUE
646	60c3ad5bc312abac163feccb	This statement is TRUE	Male36-clip1.mp3	54	Hearing	1	Control	Male	TRUE	TRUE
647	60c3ad5bc312abac163feccb	This statement is TRUE	Female42-clip8pause_control.mp3	55	Hearing	1	Pause	Female	TRUE	TRUE
648	60c3ad5bc312abac163feccb	This statement is TRUE	Male36-clip16.mp3	56	Hearing	1	Control	Male	TRUE	TRUE
649	60c3ad5bc312abac163feccb	This statement is TRUE	Male24-clip18_3semitones_up.mp3	57	Hearing	1	Pitch	Male	TRUE	TRUE
650	60c3ad5bc312abac163feccb	This statement is TRUE	Female15-clip11_3semitones_up.mp3	58	Hearing	1	Pitch	Female	TRUE	TRUE
651	60c3ad5bc312abac163feccb	This statement is a LIE	Female42-clip2pause_control.mp3	59	Hearing	1	Pause	Female	Lie	FALSE
652	60c3ad5bc312abac163feccb	This statement is a LIE	Female15-clip19.mp3	60	Hearing	1	Control	Female	Lie	FALSE
653	60c3ad5bc312abac163feccb	This statement is a LIE	Male24-clip8.mp3	61	Hearing	1	Control	Male	Lie	FALSE
654	60c3ad5bc312abac163feccb	This statement is TRUE	Female15-clip22.mp3	62	Hearing	1	Control	Female	TRUE	TRUE
655	60c3ad5bc312abac163feccb	This statement is TRUE	Male36-clip19.mp3	63	Hearing	1	Control	Male	TRUE	TRUE
656	60c3ad5bc312abac163feccb	This statement is TRUE	Male36-clip22.mp3	64	Hearing	1	Control	Male	TRUE	TRUE
657	60c3ad5bc312abac163feccb	This statement is TRUE	Female15-clip4.mp3	65	Hearing	1	Control	Female	TRUE	TRUE
658	60c3ad5bc312abac163feccb	This statement is a LIE	Male36-clip10.mp3	66	Hearing	1	Control	Male	Lie	FALSE
659	60c3ad5bc312abac163feccb	This statement is TRUE	Female42-clip9.mp3	67	Hearing	1	Control	Female	TRUE	TRUE
660	60c3ad5bc312abac163feccb	This statement is TRUE	Female15-clip21pause_control.mp3	68	Hearing	1	Pause	Female	TRUE	TRUE
661	60c3ad5bc312abac163feccb	This statement is a LIE	Male24-clip3_3semitones_up.mp3	69	Hearing	1	Pitch	Male	Lie	FALSE
662	60c3ad5bc312abac163feccb	This statement is TRUE	Female42-clip24.mp3	70	Hearing	1	Control	Female	TRUE	TRUE
663	60c3ad5bc312abac163feccb	This statement is TRUE	Male36-clip15pause_control.mp3	71	Hearing	1	Pause	Male	TRUE	TRUE
664	60c3ad5bc312abac163feccb	This statement is TRUE	Male24-clip6_3semitones_up.mp3	72	Hearing	1	Pitch	Male	TRUE	TRUE
665	60c3ad5bc312abac163feccb	This statement is a LIE	Female15-clip9pause_control.mp3	73	Hearing	1	Pause	Female	Lie	FALSE
666	60c3ad5bc312abac163feccb	This statement is a LIE	Male36-clip20_3semitones_up.mp3	74	Hearing	1	Pitch	Male	Lie	FALSE
667	60c3ad5bc312abac163feccb	This statement is TRUE	Male36-clip21pause_control.mp3	75	Hearing	1	Pause	Male	TRUE	TRUE
668	60c3ad5bc312abac163feccb	This statement is TRUE	Male24-clip10pause_control.mp3	77	Hearing	1	Pause	Male	TRUE	TRUE
669	60c3ad5bc312abac163feccb	This statement is TRUE	Male24-clip12_3semitones_up.mp3	78	Hearing	1	Pitch	Male	TRUE	TRUE
670	60c3ad5bc312abac163feccb	This statement is TRUE	Male36-clip7.mp3	79	Hearing	1	Control	Male	TRUE	TRUE
671	60c3ad5bc312abac163feccb	This statement is a LIE	Female15-clip18pause_control.mp3	80	Hearing	1	Pause	Female	Lie	FALSE
672	60c3ad5bc312abac163feccb	This statement is TRUE	Male24-clip9_3semitones_up.mp3	81	Hearing	1	Pitch	Male	TRUE	TRUE
673	60c3ad5bc312abac163feccb	This statement is TRUE	Male36-clip6pause_control.mp3	84	Hearing	1	Pause	Male	TRUE	TRUE
674	60c3ad5bc312abac163feccb	This statement is TRUE	Female15-clip16.mp3	85	Hearing	1	Control	Female	TRUE	TRUE
675	60c3ad5bc312abac163feccb	This statement is TRUE	Female42-clip25_3semitones_up.mp3	86	Hearing	1	Pitch	Female	TRUE	TRUE
676	60c3ad5bc312abac163feccb	This statement is a LIE	Female15-clip12pause_control.mp3	87	Hearing	1	Pause	Female	Lie	FALSE
677	60c3ad5bc312abac163feccb	This statement is a LIE	Female42-clip15.mp3	88	Hearing	1	Control	Female	Lie	FALSE
678	60c3ad5bc312abac163feccb	This statement is TRUE	Female42-clip13_3semitones_up.mp3	89	Hearing	1	Pitch	Female	TRUE	TRUE
679	60c3ad5bc312abac163feccb	This statement is TRUE	Male24-clip14.mp3	90	Hearing	1	Control	Male	TRUE	TRUE
680	60c3ad5bc312abac163feccb	This statement is TRUE	Male36-clip24pause_control.mp3	91	Hearing	1	Pause	Male	TRUE	TRUE
681	60c3ad5bc312abac163feccb	This statement is TRUE	Female42-clip17pause_control.mp3	92	Hearing	1	Pause	Female	TRUE	TRUE
682	60c3ad5bc312abac163feccb	This statement is a LIE	Female42-clip19_3semitones_up.mp3	93	Hearing	1	Pitch	Female	Lie	FALSE
683	60c3ad5bc312abac163feccb	This statement is TRUE	Male36-clip18pause_control.mp3	94	Hearing	1	Pause	Male	TRUE	TRUE
684	60c3ad5bc312abac163feccb	This statement is a LIE	Female15-clip23_3semitones_up.mp3	95	Hearing	1	Pitch	Female	Lie	FALSE
685	60c3ad5bc312abac163feccb	This statement is TRUE	Male24-clip24_3semitones_up.mp3	96	Hearing	1	Pitch	Male	TRUE	TRUE
686	60c3ad5bc312abac163feccb	This statement is TRUE	Female42-clip22_3semitones_up.mp3	97	Hearing	1	Pitch	Female	TRUE	TRUE
687	60c3ad5bc312abac163feccb	This statement is TRUE	Female42-clip18.mp3	98	Hearing	1	Control	Female	TRUE	TRUE
688	60c3ad5bc312abac163feccb	This statement is a LIE	Female15-clip15pauses_control.mp3	99	Hearing	1	Pause	Female	Lie	FALSE
689	60c3ad5bc312abac163feccb	This statement is a LIE	Male24-clip13pause_control.mp3	100	Hearing	1	Pause	Male	Lie	FALSE
690	60c3ad5bc312abac163feccb	This statement is TRUE	Male24-clip11.mp3	101	Hearing	1	Control	Male	TRUE	TRUE
691	60c3ad5bc312abac163feccb	This statement is a LIE	Female15-clip17_3semitones_up.mp3	102	Hearing	1	Pitch	Female	Lie	FALSE
692	60c3ad5bc312abac163feccb	This statement is a LIE	Male36-clip8_3semitones_up.mp3	103	Hearing	1	Pitch	Male	Lie	FALSE
693	60c3ad5bc312abac163feccb	This statement is a LIE	Male24-clip4pause_control.mp3	105	Hearing	1	Pause	Male	Lie	FALSE
694	60c3acc65b5918dadc06ac3c	This statement is TRUE	Female15-clip1.mp3	1	Hearing	1	Control	Female	TRUE	TRUE
695	60c3acc65b5918dadc06ac3c	This statement is TRUE	Female15-clip3pause_control.mp3	2	Hearing	1	Pause	Female	TRUE	TRUE
696	60c3acc65b5918dadc06ac3c	This statement is a LIE	Female42-clip15.mp3	3	Hearing	1	Control	Female	Lie	FALSE
697	60c3acc65b5918dadc06ac3c	This statement is a LIE	Male36-clip17_3semitones_up.mp3	4	Hearing	1	Pitch	Male	Lie	FALSE
698	60c3acc65b5918dadc06ac3c	This statement is TRUE	Male24-clip8.mp3	5	Hearing	1	Control	Male	TRUE	TRUE
699	60c3acc65b5918dadc06ac3c	This statement is a LIE	Male24-clip22pause_control.mp3	6	Hearing	1	Pause	Male	Lie	FALSE
700	60c3acc65b5918dadc06ac3c	This statement is a LIE	Female42-clip13_3semitones_up.mp3	7	Hearing	1	Pitch	Female	Lie	FALSE
701	60c3acc65b5918dadc06ac3c	This statement is a LIE	Male36-clip18pause_control.mp3	8	Hearing	1	Pause	Male	Lie	FALSE
702	60c3acc65b5918dadc06ac3c	This statement is TRUE	Male36-clip24pause_control.mp3	9	Hearing	1	Pause	Male	TRUE	TRUE
703	60c3acc65b5918dadc06ac3c	This statement is TRUE	Male24-clip10pause_control.mp3	10	Hearing	1	Pause	Male	TRUE	TRUE
704	60c3acc65b5918dadc06ac3c	This statement is a LIE	Female15-clip12pause_control.mp3	11	Hearing	1	Pause	Female	Lie	FALSE
705	60c3acc65b5918dadc06ac3c	This statement is a LIE	Female15-clip4.mp3	12	Hearing	1	Control	Female	Lie	FALSE
706	60c3acc65b5918dadc06ac3c	This statement is a LIE	Female42-clip8pause_control.mp3	13	Hearing	1	Pause	Female	Lie	FALSE
707	60c3acc65b5918dadc06ac3c	This statement is TRUE	Female42-clip7_3semitones_up.mp3	14	Hearing	1	Pitch	Female	TRUE	TRUE
708	60c3acc65b5918dadc06ac3c	This statement is a LIE	Male36-clip10.mp3	15	Hearing	1	Control	Male	Lie	FALSE
709	60c3acc65b5918dadc06ac3c	This statement is a LIE	Male24-clip23.mp3	16	Hearing	1	Control	Male	Lie	FALSE
710	60c3acc65b5918dadc06ac3c	This statement is TRUE	Female15-clip24pause_control.mp3	17	Hearing	1	Pause	Female	TRUE	TRUE
711	60c3acc65b5918dadc06ac3c	This statement is TRUE	Female15-clip2_3semitones_up.mp3	18	Hearing	1	Pitch	Female	TRUE	TRUE
712	60c3acc65b5918dadc06ac3c	This statement is a LIE	Male24-clip1pause_control.mp3	19	Hearing	1	Pause	Male	Lie	FALSE
713	60c3acc65b5918dadc06ac3c	This statement is a LIE	Male36-clip14_3semitones_up.mp3	20	Hearing	1	Pitch	Male	Lie	FALSE
714	60c3acc65b5918dadc06ac3c	This statement is TRUE	Male24-clip3_3semitones_up.mp3	21	Hearing	1	Pitch	Male	TRUE	TRUE
715	60c3acc65b5918dadc06ac3c	This statement is a LIE	Male24-clip25pause_control.mp3	23	Hearing	1	Pause	Male	Lie	FALSE
716	60c3acc65b5918dadc06ac3c	This statement is a LIE	Female15-clip19.mp3	24	Hearing	1	Control	Female	Lie	FALSE
717	60c3acc65b5918dadc06ac3c	This statement is TRUE	Female15-clip21pause_control.mp3	25	Hearing	1	Pause	Female	TRUE	TRUE
718	60c3acc65b5918dadc06ac3c	This statement is TRUE	Female15-clip14_3semitones_up.mp3	26	Hearing	1	Pitch	Female	TRUE	TRUE
719	60c3acc65b5918dadc06ac3c	This statement is a LIE	Female42-clip6.mp3	27	Hearing	1	Control	Female	Lie	FALSE
720	60c3acc65b5918dadc06ac3c	This statement is a LIE	Male36-clip9pause_control.mp3	28	Hearing	1	Pause	Male	Lie	FALSE
721	60c3acc65b5918dadc06ac3c	This statement is TRUE	Female15-clip13.mp3	29	Hearing	1	Control	Female	TRUE	TRUE
722	60c3acc65b5918dadc06ac3c	This statement is TRUE	Female42-clip18.mp3	30	Hearing	1	Control	Female	TRUE	TRUE
723	60c3acc65b5918dadc06ac3c	This statement is TRUE	Female15-clip15pauses_control.mp3	31	Hearing	1	Pause	Female	TRUE	TRUE
724	60c3acc65b5918dadc06ac3c	This statement is a LIE	Male36-clip4.mp3	32	Hearing	1	Control	Male	Lie	FALSE
725	60c3acc65b5918dadc06ac3c	This statement is a LIE	Female42-clip19_3semitones_up.mp3	33	Hearing	1	Pitch	Female	Lie	FALSE
726	60c3acc65b5918dadc06ac3c	This statement is a LIE	Female15-clip23_3semitones_up.mp3	34	Hearing	1	Pitch	Female	Lie	FALSE
727	60c3acc65b5918dadc06ac3c	This statement is TRUE	Male24-clip19pause_control.mp3	35	Hearing	1	Pause	Male	TRUE	TRUE
728	60c3acc65b5918dadc06ac3c	This statement is a LIE	Female15-clip9pause_control.mp3	36	Hearing	1	Pause	Female	Lie	FALSE
729	60c3acc65b5918dadc06ac3c	This statement is a LIE	Male24-clip21_3semitones_up.mp3	37	Hearing	1	Pitch	Male	Lie	FALSE
730	60c3acc65b5918dadc06ac3c	This statement is TRUE	Female15-clip8_3semitones_up.mp3	38	Hearing	1	Pitch	Female	TRUE	TRUE
731	60c3acc65b5918dadc06ac3c	This statement is TRUE	Female42-clip1_3semitones_up.mp3	39	Hearing	1	Pitch	Female	TRUE	TRUE
732	60c3acc65b5918dadc06ac3c	This statement is a LIE	Male24-clip24_3semitones_up.mp3	40	Hearing	1	Pitch	Male	Lie	FALSE
733	60c3acc65b5918dadc06ac3c	This statement is TRUE	Female15-clip18pause_control.mp3	41	Hearing	1	Pause	Female	TRUE	TRUE
734	60c3acc65b5918dadc06ac3c	This statement is a LIE	Male24-clip14.mp3	42	Hearing	1	Control	Male	Lie	FALSE
735	60c3acc65b5918dadc06ac3c	This statement is TRUE	Male24-clip13pause_control.mp3	43	Hearing	1	Pause	Male	TRUE	TRUE
736	60c3acc65b5918dadc06ac3c	This statement is TRUE	Female15-clip7.mp3	44	Hearing	1	Control	Female	TRUE	TRUE
737	60c3acc65b5918dadc06ac3c	This statement is TRUE	Male36-clip2_3semitones_up.mp3	45	Hearing	1	Pitch	Male	TRUE	TRUE
738	60c3acc65b5918dadc06ac3c	This statement is a LIE	Male24-clip2.mp3	46	Hearing	1	Control	Male	Lie	FALSE
739	60c3acc65b5918dadc06ac3c	This statement is TRUE	Male36-clip3pause_control.mp3	47	Hearing	1	Pause	Male	TRUE	TRUE
740	60c3acc65b5918dadc06ac3c	This statement is TRUE	Female15-clip11_3semitones_up.mp3	48	Hearing	1	Pitch	Female	TRUE	TRUE
741	60c3acc65b5918dadc06ac3c	This statement is TRUE	Female15-clip5_3semitones_up.mp3	49	Hearing	1	Pitch	Female	TRUE	TRUE
742	60c3acc65b5918dadc06ac3c	This statement is TRUE	Male24-clip12_3semitones_up.mp3	50	Hearing	1	Pitch	Male	TRUE	TRUE
743	60c3acc65b5918dadc06ac3c	This statement is TRUE	Male36-clip8_3semitones_up.mp3	51	Hearing	1	Pitch	Male	TRUE	TRUE
744	60c3acc65b5918dadc06ac3c	This statement is TRUE	Male36-clip1.mp3	52	Hearing	1	Control	Male	TRUE	TRUE
745	60c3acc65b5918dadc06ac3c	This statement is a LIE	Male24-clip7pause_control.mp3	54	Hearing	1	Pause	Male	Lie	FALSE
746	60c3acc65b5918dadc06ac3c	This statement is TRUE	Male24-clip20.mp3	55	Hearing	1	Control	Male	TRUE	TRUE
747	60c3acc65b5918dadc06ac3c	This statement is TRUE	Female42-clip17pause_control.mp3	56	Hearing	1	Pause	Female	TRUE	TRUE
748	60c3acc65b5918dadc06ac3c	This statement is TRUE	Female15-clip10.mp3	57	Hearing	1	Control	Female	TRUE	TRUE
749	60c3acc65b5918dadc06ac3c	This statement is TRUE	Male24-clip5.mp3	58	Hearing	1	Control	Male	TRUE	TRUE
750	60c3acc65b5918dadc06ac3c	This statement is TRUE	Male36-clip12pause_control.mp3	59	Hearing	1	Pause	Male	TRUE	TRUE
751	60c3acc65b5918dadc06ac3c	This statement is TRUE	Female42-clip9.mp3	60	Hearing	1	Control	Female	TRUE	TRUE
752	60c3acc65b5918dadc06ac3c	This statement is TRUE	Male36-clip19.mp3	61	Hearing	1	Control	Male	TRUE	TRUE
753	60c3acc65b5918dadc06ac3c	This statement is a LIE	Female15-clip25.mp3	62	Hearing	1	Control	Female	Lie	FALSE
754	60c3acc65b5918dadc06ac3c	This statement is a LIE	Female42-clip14pause_control.mp3	63	Hearing	1	Pause	Female	Lie	FALSE
755	60c3acc65b5918dadc06ac3c	This statement is a LIE	Male24-clip16pause_control.mp3	64	Hearing	1	Pause	Male	Lie	FALSE
756	60c3acc65b5918dadc06ac3c	This statement is TRUE	Male36-clip21pause_control.mp3	65	Hearing	1	Pause	Male	TRUE	TRUE
757	60c3acc65b5918dadc06ac3c	This statement is TRUE	Female15-clip16.mp3	66	Hearing	1	Control	Female	TRUE	TRUE
758	60c3acc65b5918dadc06ac3c	This statement is TRUE	Female42-clip22_3semitones_up.mp3	67	Hearing	1	Pitch	Female	TRUE	TRUE
759	60c3acc65b5918dadc06ac3c	This statement is a LIE	Female42-clip24.mp3	68	Hearing	1	Control	Female	Lie	FALSE
760	60c3acc65b5918dadc06ac3c	This statement is a LIE	Female42-clip20pause_control.mp3	69	Hearing	1	Pause	Female	Lie	FALSE
761	60c3acc65b5918dadc06ac3c	This statement is a LIE	Male36-clip5_3semitones_up.mp3	70	Hearing	1	Pitch	Male	Lie	FALSE
762	60c3acc65b5918dadc06ac3c	This statement is TRUE	Female15-clip22.mp3	71	Hearing	1	Control	Female	TRUE	TRUE
763	60c3acc65b5918dadc06ac3c	This statement is TRUE	Male24-clip6_3semitones_up.mp3	72	Hearing	1	Pitch	Male	TRUE	TRUE
764	60c3acc65b5918dadc06ac3c	This statement is TRUE	Male36-clip23_3semitones_up.mp3	73	Hearing	1	Pitch	Male	TRUE	TRUE
765	60c3acc65b5918dadc06ac3c	This statement is TRUE	Male36-clip15pause_control.mp3	74	Hearing	1	Pause	Male	TRUE	TRUE
766	60c3acc65b5918dadc06ac3c	This statement is TRUE	Female15-clip17_3semitones_up.mp3	75	Hearing	1	Pitch	Female	TRUE	TRUE
767	60c3acc65b5918dadc06ac3c	This statement is a LIE	Male24-clip4pause_control.mp3	76	Hearing	1	Pause	Male	Lie	FALSE
768	60c3acc65b5918dadc06ac3c	This statement is TRUE	Male36-clip13.mp3	77	Hearing	1	Control	Male	TRUE	TRUE
769	60c3acc65b5918dadc06ac3c	This statement is a LIE	Male24-clip9_3semitones_up.mp3	78	Hearing	1	Pitch	Male	Lie	FALSE
770	60c3acc65b5918dadc06ac3c	This statement is TRUE	Female42-clip21.mp3	79	Hearing	1	Control	Female	TRUE	TRUE
771	60c3acc65b5918dadc06ac3c	This statement is a LIE	Male24-clip15_3semitones_up.mp3	80	Hearing	1	Pitch	Male	Lie	FALSE
772	60c3acc65b5918dadc06ac3c	This statement is a LIE	Female15-clip20_3semitones_up.mp3	81	Hearing	1	Pitch	Female	Lie	FALSE
773	60c3acc65b5918dadc06ac3c	This statement is TRUE	Female42-clip12.mp3	82	Hearing	1	Control	Female	TRUE	TRUE
774	60c3acc65b5918dadc06ac3c	This statement is a LIE	Female42-clip5pause_control.mp3	83	Hearing	1	Pause	Female	Lie	FALSE
775	60c3acc65b5918dadc06ac3c	This statement is TRUE	Male36-clip7.mp3	84	Hearing	1	Control	Male	TRUE	TRUE
776	60c3acc65b5918dadc06ac3c	This statement is a LIE	Male24-clip18_3semitones_up.mp3	85	Hearing	1	Pitch	Male	Lie	FALSE
777	60c3acc65b5918dadc06ac3c	This statement is TRUE	Female42-clip25_3semitones_up.mp3	86	Hearing	1	Pitch	Female	TRUE	TRUE
778	60c3acc65b5918dadc06ac3c	This statement is a LIE	Female42-clip3.mp3	87	Hearing	1	Control	Female	Lie	FALSE
779	60c3acc65b5918dadc06ac3c	This statement is TRUE	Female42-clip4_3semitones_up.mp3	89	Hearing	1	Pitch	Female	TRUE	TRUE
780	60c3acc65b5918dadc06ac3c	This statement is a LIE	Male36-clip22.mp3	90	Hearing	1	Control	Male	Lie	FALSE
781	60c3acc65b5918dadc06ac3c	This statement is TRUE	Male36-clip20_3semitones_up.mp3	91	Hearing	1	Pitch	Male	TRUE	TRUE
782	60c3acc65b5918dadc06ac3c	This statement is TRUE	Male36-clip16.mp3	92	Hearing	1	Control	Male	TRUE	TRUE
783	60c3acc65b5918dadc06ac3c	This statement is a LIE	Female42-clip2pause_control.mp3	93	Hearing	1	Pause	Female	Lie	FALSE
784	60c3acc65b5918dadc06ac3c	This statement is TRUE	Male24-clip11.mp3	94	Hearing	1	Control	Male	TRUE	TRUE
785	60c3acc65b5918dadc06ac3c	This statement is a LIE	Male36-clip11_3semitones_up.mp3	97	Hearing	1	Pitch	Male	Lie	FALSE
786	60c3acc65b5918dadc06ac3c	This statement is TRUE	Female42-clip11pause_control.mp3	99	Hearing	1	Pause	Female	TRUE	TRUE
787	60c3acc65b5918dadc06ac3c	This statement is a LIE	Female42-clip23pause_control.mp3	100	Hearing	1	Pause	Female	Lie	FALSE
788	60c3acc65b5918dadc06ac3c	This statement is TRUE	Male24-clip17.mp3	101	Hearing	1	Control	Male	TRUE	TRUE
789	60c3acc65b5918dadc06ac3c	This statement is TRUE	Female15-clip6pause_control.mp3	102	Hearing	1	Pause	Female	TRUE	TRUE
790	60c3acc65b5918dadc06ac3c	This statement is a LIE	Male36-clip6pause_control.mp3	103	Hearing	1	Pause	Male	Lie	FALSE
791	60c3acc65b5918dadc06ac3c	This statement is a LIE	Female42-clip16_3semitones_up.mp3	104	Hearing	1	Pitch	Female	Lie	FALSE
792	60c3acc65b5918dadc06ac3c	This statement is TRUE	Female42-clip10_3semitones_up.mp3	105	Hearing	1	Pitch	Female	TRUE	TRUE
793	60c639db43def98399a07314	This statement is TRUE	Female15-clip1.mp3	1	Hearing	1	Control	Female	TRUE	TRUE
794	60c639db43def98399a07314	This statement is a LIE	Female15-clip9pause_control.mp3	2	Hearing	1	Pause	Female	Lie	FALSE
795	60c639db43def98399a07314	This statement is TRUE	Female15-clip16.mp3	3	Hearing	1	Control	Female	TRUE	TRUE
796	60c639db43def98399a07314	This statement is TRUE	Male24-clip17.mp3	4	Hearing	1	Control	Male	TRUE	TRUE
797	60c639db43def98399a07314	This statement is a LIE	Male36-clip24pause_control.mp3	5	Hearing	1	Pause	Male	Lie	FALSE
798	60c639db43def98399a07314	This statement is TRUE	Female42-clip18.mp3	6	Hearing	1	Control	Female	TRUE	TRUE
799	60c639db43def98399a07314	This statement is a LIE	Male36-clip14_3semitones_up.mp3	7	Hearing	1	Pitch	Male	Lie	FALSE
800	60c639db43def98399a07314	This statement is TRUE	Female15-clip19.mp3	8	Hearing	1	Control	Female	TRUE	TRUE
801	60c639db43def98399a07314	This statement is TRUE	Female15-clip14_3semitones_up.mp3	9	Hearing	1	Pitch	Female	TRUE	TRUE
802	60c639db43def98399a07314	This statement is a LIE	Male36-clip9pause_control.mp3	10	Hearing	1	Pause	Male	Lie	FALSE
803	60c639db43def98399a07314	This statement is TRUE	Female15-clip4.mp3	11	Hearing	1	Control	Female	TRUE	TRUE
804	60c639db43def98399a07314	This statement is a LIE	Male36-clip21pause_control.mp3	12	Hearing	1	Pause	Male	Lie	FALSE
805	60c639db43def98399a07314	This statement is a LIE	Female15-clip21pause_control.mp3	13	Hearing	1	Pause	Female	Lie	FALSE
806	60c639db43def98399a07314	This statement is TRUE	Male36-clip10.mp3	14	Hearing	1	Control	Male	TRUE	TRUE
807	60c639db43def98399a07314	This statement is TRUE	Female15-clip7.mp3	15	Hearing	1	Control	Female	TRUE	TRUE
808	60c639db43def98399a07314	This statement is TRUE	Male24-clip10pause_control.mp3	16	Hearing	1	Pause	Male	TRUE	TRUE
809	60c639db43def98399a07314	This statement is TRUE	Female15-clip17_3semitones_up.mp3	17	Hearing	1	Pitch	Female	TRUE	TRUE
810	60c639db43def98399a07314	This statement is a LIE	Male24-clip22pause_control.mp3	18	Hearing	1	Pause	Male	Lie	FALSE
811	60c639db43def98399a07314	This statement is TRUE	Male24-clip14.mp3	19	Hearing	1	Control	Male	TRUE	TRUE
812	60c639db43def98399a07314	This statement is a LIE	Female15-clip15pauses_control.mp3	20	Hearing	1	Pause	Female	Lie	FALSE
813	60c639db43def98399a07314	This statement is a LIE	Male24-clip6_3semitones_up.mp3	21	Hearing	1	Pitch	Male	Lie	FALSE
814	60c639db43def98399a07314	This statement is a LIE	Female42-clip10_3semitones_up.mp3	22	Hearing	1	Pitch	Female	Lie	FALSE
815	60c639db43def98399a07314	This statement is TRUE	Male36-clip16.mp3	23	Hearing	1	Control	Male	TRUE	TRUE
816	60c639db43def98399a07314	This statement is TRUE	Male36-clip5_3semitones_up.mp3	24	Hearing	1	Pitch	Male	TRUE	TRUE
817	60c639db43def98399a07314	This statement is TRUE	Male24-clip24_3semitones_up.mp3	25	Hearing	1	Pitch	Male	TRUE	TRUE
818	60c639db43def98399a07314	This statement is a LIE	Female42-clip3.mp3	26	Hearing	1	Control	Female	Lie	FALSE
819	60c639db43def98399a07314	This statement is a LIE	Male36-clip12pause_control.mp3	27	Hearing	1	Pause	Male	Lie	FALSE
820	60c639db43def98399a07314	This statement is TRUE	Male36-clip7.mp3	28	Hearing	1	Control	Male	TRUE	TRUE
821	60c639db43def98399a07314	This statement is TRUE	Female42-clip13_3semitones_up.mp3	29	Hearing	1	Pitch	Female	TRUE	TRUE
822	60c639db43def98399a07314	This statement is TRUE	Male24-clip23.mp3	30	Hearing	1	Control	Male	TRUE	TRUE
823	60c639db43def98399a07314	This statement is a LIE	Female42-clip5pause_control.mp3	31	Hearing	1	Pause	Female	Lie	FALSE
824	60c639db43def98399a07314	This statement is TRUE	Female42-clip15.mp3	32	Hearing	1	Control	Female	TRUE	TRUE
825	60c639db43def98399a07314	This statement is TRUE	Male36-clip17_3semitones_up.mp3	34	Hearing	1	Pitch	Male	TRUE	TRUE
826	60c639db43def98399a07314	This statement is TRUE	Female15-clip8_3semitones_up.mp3	35	Hearing	1	Pitch	Female	TRUE	TRUE
827	60c639db43def98399a07314	This statement is a LIE	Male24-clip21_3semitones_up.mp3	36	Hearing	1	Pitch	Male	Lie	FALSE
828	60c639db43def98399a07314	This statement is TRUE	Male24-clip1pause_control.mp3	37	Hearing	1	Pause	Male	TRUE	TRUE
829	60c639db43def98399a07314	This statement is a LIE	Male24-clip20.mp3	38	Hearing	1	Control	Male	Lie	FALSE
830	60c639db43def98399a07314	This statement is a LIE	Female42-clip8pause_control.mp3	39	Hearing	1	Pause	Female	Lie	FALSE
831	60c639db43def98399a07314	This statement is a LIE	Female42-clip1_3semitones_up.mp3	40	Hearing	1	Pitch	Female	Lie	FALSE
832	60c639db43def98399a07314	This statement is TRUE	Female15-clip25.mp3	41	Hearing	1	Control	Female	TRUE	TRUE
833	60c639db43def98399a07314	This statement is TRUE	Female42-clip16_3semitones_up.mp3	42	Hearing	1	Pitch	Female	TRUE	TRUE
834	60c639db43def98399a07314	This statement is a LIE	Male36-clip15pause_control.mp3	43	Hearing	1	Pause	Male	Lie	FALSE
835	60c639db43def98399a07314	This statement is TRUE	Female42-clip12.mp3	44	Hearing	1	Control	Female	TRUE	TRUE
836	60c639db43def98399a07314	This statement is TRUE	Female15-clip2_3semitones_up.mp3	45	Hearing	1	Pitch	Female	TRUE	TRUE
837	60c639db43def98399a07314	This statement is TRUE	Male36-clip18pause_control.mp3	46	Hearing	1	Pause	Male	TRUE	TRUE
838	60c639db43def98399a07314	This statement is TRUE	Male24-clip9_3semitones_up.mp3	47	Hearing	1	Pitch	Male	TRUE	TRUE
839	60c639db43def98399a07314	This statement is a LIE	Female42-clip11pause_control.mp3	48	Hearing	1	Pause	Female	Lie	FALSE
840	60c639db43def98399a07314	This statement is a LIE	Male36-clip8_3semitones_up.mp3	49	Hearing	1	Pitch	Male	Lie	FALSE
841	60c639db43def98399a07314	This statement is a LIE	Male24-clip5.mp3	50	Hearing	1	Control	Male	Lie	FALSE
842	60c639db43def98399a07314	This statement is a LIE	Female42-clip21.mp3	51	Hearing	1	Control	Female	Lie	FALSE
843	60c639db43def98399a07314	This statement is TRUE	Female42-clip17pause_control.mp3	52	Hearing	1	Pause	Female	TRUE	TRUE
844	60c639db43def98399a07314	This statement is TRUE	Female15-clip11_3semitones_up.mp3	53	Hearing	1	Pitch	Female	TRUE	TRUE
845	60c639db43def98399a07314	This statement is a LIE	Female42-clip24.mp3	54	Hearing	1	Control	Female	Lie	FALSE
846	60c639db43def98399a07314	This statement is TRUE	Female15-clip22.mp3	55	Hearing	1	Control	Female	TRUE	TRUE
847	60c639db43def98399a07314	This statement is TRUE	Male24-clip2.mp3	57	Hearing	1	Control	Male	TRUE	TRUE
848	60c639db43def98399a07314	This statement is TRUE	Female42-clip22_3semitones_up.mp3	58	Hearing	1	Pitch	Female	TRUE	TRUE
849	60c639db43def98399a07314	This statement is TRUE	Male36-clip1.mp3	59	Hearing	1	Control	Male	TRUE	TRUE
850	60c639db43def98399a07314	This statement is a LIE	Female42-clip20pause_control.mp3	60	Hearing	1	Pause	Female	Lie	FALSE
851	60c639db43def98399a07314	This statement is TRUE	Female15-clip10.mp3	61	Hearing	1	Control	Female	TRUE	TRUE
852	60c639db43def98399a07314	This statement is TRUE	Female15-clip18pause_control.mp3	62	Hearing	1	Pause	Female	TRUE	TRUE
853	60c639db43def98399a07314	This statement is TRUE	Male36-clip23_3semitones_up.mp3	63	Hearing	1	Pitch	Male	TRUE	TRUE
854	60c639db43def98399a07314	This statement is TRUE	Male36-clip19.mp3	64	Hearing	1	Control	Male	TRUE	TRUE
855	60c639db43def98399a07314	This statement is TRUE	Male24-clip16pause_control.mp3	66	Hearing	1	Pause	Male	TRUE	TRUE
856	60c639db43def98399a07314	This statement is TRUE	Male36-clip11_3semitones_up.mp3	67	Hearing	1	Pitch	Male	TRUE	TRUE
857	60c639db43def98399a07314	This statement is TRUE	Female15-clip13.mp3	68	Hearing	1	Control	Female	TRUE	TRUE
858	60c639db43def98399a07314	This statement is TRUE	Female15-clip23_3semitones_up.mp3	69	Hearing	1	Pitch	Female	TRUE	TRUE
859	60c639db43def98399a07314	This statement is a LIE	Female42-clip25_3semitones_up.mp3	70	Hearing	1	Pitch	Female	Lie	FALSE
860	60c639db43def98399a07314	This statement is TRUE	Female42-clip19_3semitones_up.mp3	71	Hearing	1	Pitch	Female	TRUE	TRUE
861	60c639db43def98399a07314	This statement is TRUE	Female15-clip5_3semitones_up.mp3	72	Hearing	1	Pitch	Female	TRUE	TRUE
862	60c639db43def98399a07314	This statement is a LIE	Female42-clip7_3semitones_up.mp3	73	Hearing	1	Pitch	Female	Lie	FALSE
863	60c639db43def98399a07314	This statement is TRUE	Female42-clip6.mp3	74	Hearing	1	Control	Female	TRUE	TRUE
864	60c639db43def98399a07314	This statement is a LIE	Male36-clip6pause_control.mp3	75	Hearing	1	Pause	Male	Lie	FALSE
865	60c639db43def98399a07314	This statement is a LIE	Female15-clip24pause_control.mp3	76	Hearing	1	Pause	Female	Lie	FALSE
866	60c639db43def98399a07314	This statement is TRUE	Male24-clip19pause_control.mp3	77	Hearing	1	Pause	Male	TRUE	TRUE
867	60c639db43def98399a07314	This statement is a LIE	Male24-clip15_3semitones_up.mp3	78	Hearing	1	Pitch	Male	Lie	FALSE
868	60c639db43def98399a07314	This statement is TRUE	Male24-clip18_3semitones_up.mp3	79	Hearing	1	Pitch	Male	TRUE	TRUE
869	60c639db43def98399a07314	This statement is TRUE	Female42-clip9.mp3	80	Hearing	1	Control	Female	TRUE	TRUE
870	60c639db43def98399a07314	This statement is TRUE	Male24-clip4pause_control.mp3	81	Hearing	1	Pause	Male	TRUE	TRUE
871	60c639db43def98399a07314	This statement is a LIE	Female15-clip6pause_control.mp3	83	Hearing	1	Pause	Female	Lie	FALSE
872	60c639db43def98399a07314	This statement is TRUE	Male36-clip4.mp3	84	Hearing	1	Control	Male	TRUE	TRUE
873	60c639db43def98399a07314	This statement is TRUE	Male36-clip13.mp3	85	Hearing	1	Control	Male	TRUE	TRUE
874	60c639db43def98399a07314	This statement is a LIE	Female42-clip4_3semitones_up.mp3	86	Hearing	1	Pitch	Female	Lie	FALSE
875	60c639db43def98399a07314	This statement is TRUE	Female15-clip20_3semitones_up.mp3	87	Hearing	1	Pitch	Female	TRUE	TRUE
876	60c639db43def98399a07314	This statement is a LIE	Female42-clip14pause_control.mp3	89	Hearing	1	Pause	Female	Lie	FALSE
877	60c639db43def98399a07314	This statement is TRUE	Male36-clip20_3semitones_up.mp3	90	Hearing	1	Pitch	Male	TRUE	TRUE
878	60c639db43def98399a07314	This statement is a LIE	Male24-clip13pause_control.mp3	91	Hearing	1	Pause	Male	Lie	FALSE
879	60c639db43def98399a07314	This statement is a LIE	Male36-clip2_3semitones_up.mp3	92	Hearing	1	Pitch	Male	Lie	FALSE
880	60c639db43def98399a07314	This statement is a LIE	Male24-clip8.mp3	93	Hearing	1	Control	Male	Lie	FALSE
881	60c639db43def98399a07314	This statement is TRUE	Male36-clip22.mp3	94	Hearing	1	Control	Male	TRUE	TRUE
882	60c639db43def98399a07314	This statement is a LIE	Male24-clip12_3semitones_up.mp3	95	Hearing	1	Pitch	Male	Lie	FALSE
883	60c639db43def98399a07314	This statement is TRUE	Male24-clip25pause_control.mp3	96	Hearing	1	Pause	Male	TRUE	TRUE
884	60c639db43def98399a07314	This statement is TRUE	Male24-clip7pause_control.mp3	97	Hearing	1	Pause	Male	TRUE	TRUE
885	60c639db43def98399a07314	This statement is TRUE	Male24-clip3_3semitones_up.mp3	98	Hearing	1	Pitch	Male	TRUE	TRUE
886	60c639db43def98399a07314	This statement is a LIE	Male36-clip3pause_control.mp3	99	Hearing	1	Pause	Male	Lie	FALSE
887	60c639db43def98399a07314	This statement is a LIE	Female15-clip12pause_control.mp3	100	Hearing	1	Pause	Female	Lie	FALSE
888	60c639db43def98399a07314	This statement is TRUE	Male24-clip11.mp3	101	Hearing	1	Control	Male	TRUE	TRUE
889	60c639db43def98399a07314	This statement is a LIE	Female42-clip2pause_control.mp3	102	Hearing	1	Pause	Female	Lie	FALSE
890	60c639db43def98399a07314	This statement is a LIE	Female42-clip23pause_control.mp3	103	Hearing	1	Pause	Female	Lie	FALSE
891	60c639db43def98399a07314	This statement is a LIE	Female15-clip3pause_control.mp3	104	Hearing	1	Pause	Female	Lie	FALSE
892	60c63f4f4ec6385b796de7b0	This statement is a LIE	Female15-clip1.mp3	1	Hearing	1	Control	Female	Lie	FALSE
893	60c63f4f4ec6385b796de7b0	This statement is TRUE	Female15-clip16.mp3	2	Hearing	1	Control	Female	TRUE	TRUE
894	60c63f4f4ec6385b796de7b0	This statement is TRUE	Male36-clip22.mp3	3	Hearing	1	Control	Male	TRUE	TRUE
895	60c63f4f4ec6385b796de7b0	This statement is a LIE	Female42-clip15.mp3	4	Hearing	1	Control	Female	Lie	FALSE
896	60c63f4f4ec6385b796de7b0	This statement is TRUE	Male36-clip2_3semitones_up.mp3	6	Hearing	1	Pitch	Male	TRUE	TRUE
897	60c63f4f4ec6385b796de7b0	This statement is a LIE	Male36-clip3pause_control.mp3	7	Hearing	1	Pause	Male	Lie	FALSE
898	60c63f4f4ec6385b796de7b0	This statement is a LIE	Male36-clip6pause_control.mp3	8	Hearing	1	Pause	Male	Lie	FALSE
899	60c63f4f4ec6385b796de7b0	This statement is TRUE	Male36-clip9pause_control.mp3	9	Hearing	1	Pause	Male	TRUE	TRUE
900	60c63f4f4ec6385b796de7b0	This statement is TRUE	Female15-clip14_3semitones_up.mp3	10	Hearing	1	Pitch	Female	TRUE	TRUE
901	60c63f4f4ec6385b796de7b0	This statement is TRUE	Female42-clip1_3semitones_up.mp3	11	Hearing	1	Pitch	Female	TRUE	TRUE
902	60c63f4f4ec6385b796de7b0	This statement is a LIE	Male24-clip4pause_control.mp3	12	Hearing	1	Pause	Male	Lie	FALSE
903	60c63f4f4ec6385b796de7b0	This statement is TRUE	Male36-clip17_3semitones_up.mp3	13	Hearing	1	Pitch	Male	TRUE	TRUE
904	60c63f4f4ec6385b796de7b0	This statement is TRUE	Male24-clip17.mp3	14	Hearing	1	Control	Male	TRUE	TRUE
905	60c63f4f4ec6385b796de7b0	This statement is a LIE	Male36-clip13.mp3	15	Hearing	1	Control	Male	Lie	FALSE
906	60c63f4f4ec6385b796de7b0	This statement is TRUE	Female42-clip10_3semitones_up.mp3	16	Hearing	1	Pitch	Female	TRUE	TRUE
907	60c63f4f4ec6385b796de7b0	This statement is TRUE	Male24-clip20.mp3	17	Hearing	1	Control	Male	TRUE	TRUE
908	60c63f4f4ec6385b796de7b0	This statement is TRUE	Female15-clip7.mp3	18	Hearing	1	Control	Female	TRUE	TRUE
909	60c63f4f4ec6385b796de7b0	This statement is TRUE	Male24-clip12_3semitones_up.mp3	19	Hearing	1	Pitch	Male	TRUE	TRUE
910	60c63f4f4ec6385b796de7b0	This statement is TRUE	Male24-clip23.mp3	20	Hearing	1	Control	Male	TRUE	TRUE
911	60c63f4f4ec6385b796de7b0	This statement is a LIE	Male36-clip21pause_control.mp3	21	Hearing	1	Pause	Male	Lie	FALSE
912	60c63f4f4ec6385b796de7b0	This statement is TRUE	Male24-clip11.mp3	22	Hearing	1	Control	Male	TRUE	TRUE
913	60c63f4f4ec6385b796de7b0	This statement is a LIE	Female15-clip3pause_control.mp3	24	Hearing	1	Pause	Female	Lie	FALSE
914	60c63f4f4ec6385b796de7b0	This statement is TRUE	Female15-clip10.mp3	25	Hearing	1	Control	Female	TRUE	TRUE
915	60c63f4f4ec6385b796de7b0	This statement is a LIE	Female42-clip5pause_control.mp3	26	Hearing	1	Pause	Female	Lie	FALSE
916	60c63f4f4ec6385b796de7b0	This statement is TRUE	Male36-clip19.mp3	27	Hearing	1	Control	Male	TRUE	TRUE
917	60c63f4f4ec6385b796de7b0	This statement is TRUE	Male24-clip3_3semitones_up.mp3	28	Hearing	1	Pitch	Male	TRUE	TRUE
918	60c63f4f4ec6385b796de7b0	This statement is TRUE	Female42-clip24.mp3	29	Hearing	1	Control	Female	TRUE	TRUE
919	60c63f4f4ec6385b796de7b0	This statement is a LIE	Male36-clip24pause_control.mp3	30	Hearing	1	Pause	Male	Lie	FALSE
920	60c63f4f4ec6385b796de7b0	This statement is TRUE	Female15-clip19.mp3	31	Hearing	1	Control	Female	TRUE	TRUE
921	60c63f4f4ec6385b796de7b0	This statement is a LIE	Male36-clip12pause_control.mp3	32	Hearing	1	Pause	Male	Lie	FALSE
922	60c63f4f4ec6385b796de7b0	This statement is TRUE	Female15-clip5_3semitones_up.mp3	33	Hearing	1	Pitch	Female	TRUE	TRUE
923	60c63f4f4ec6385b796de7b0	This statement is TRUE	Male24-clip5.mp3	34	Hearing	1	Control	Male	TRUE	TRUE
924	60c63f4f4ec6385b796de7b0	This statement is a LIE	Female42-clip8pause_control.mp3	36	Hearing	1	Pause	Female	Lie	FALSE
925	60c63f4f4ec6385b796de7b0	This statement is TRUE	Male36-clip18pause_control.mp3	37	Hearing	1	Pause	Male	TRUE	TRUE
926	60c63f4f4ec6385b796de7b0	This statement is a LIE	Female15-clip15pauses_control.mp3	38	Hearing	1	Pause	Female	Lie	FALSE
927	60c63f4f4ec6385b796de7b0	This statement is a LIE	Female15-clip8_3semitones_up.mp3	39	Hearing	1	Pitch	Female	Lie	FALSE
928	60c63f4f4ec6385b796de7b0	This statement is a LIE	Female42-clip23pause_control.mp3	40	Hearing	1	Pause	Female	Lie	FALSE
929	60c63f4f4ec6385b796de7b0	This statement is TRUE	Female42-clip20pause_control.mp3	41	Hearing	1	Pause	Female	TRUE	TRUE
930	60c63f4f4ec6385b796de7b0	This statement is TRUE	Male36-clip11_3semitones_up.mp3	42	Hearing	1	Pitch	Male	TRUE	TRUE
931	60c63f4f4ec6385b796de7b0	This statement is a LIE	Male24-clip24_3semitones_up.mp3	43	Hearing	1	Pitch	Male	Lie	FALSE
932	60c63f4f4ec6385b796de7b0	This statement is TRUE	Female42-clip21.mp3	44	Hearing	1	Control	Female	TRUE	TRUE
933	60c63f4f4ec6385b796de7b0	This statement is TRUE	Male24-clip1pause_control.mp3	45	Hearing	1	Pause	Male	TRUE	TRUE
934	60c63f4f4ec6385b796de7b0	This statement is TRUE	Female15-clip13.mp3	46	Hearing	1	Control	Female	TRUE	TRUE
935	60c63f4f4ec6385b796de7b0	This statement is TRUE	Male24-clip21_3semitones_up.mp3	47	Hearing	1	Pitch	Male	TRUE	TRUE
936	60c63f4f4ec6385b796de7b0	This statement is TRUE	Male36-clip1.mp3	48	Hearing	1	Control	Male	TRUE	TRUE
937	60c63f4f4ec6385b796de7b0	This statement is TRUE	Male36-clip23_3semitones_up.mp3	50	Hearing	1	Pitch	Male	TRUE	TRUE
938	60c63f4f4ec6385b796de7b0	This statement is a LIE	Female15-clip23_3semitones_up.mp3	51	Hearing	1	Pitch	Female	Lie	FALSE
939	60c63f4f4ec6385b796de7b0	This statement is a LIE	Female15-clip21pause_control.mp3	52	Hearing	1	Pause	Female	Lie	FALSE
940	60c63f4f4ec6385b796de7b0	This statement is TRUE	Male24-clip7pause_control.mp3	53	Hearing	1	Pause	Male	TRUE	TRUE
941	60c63f4f4ec6385b796de7b0	This statement is TRUE	Female42-clip18.mp3	54	Hearing	1	Control	Female	TRUE	TRUE
942	60c63f4f4ec6385b796de7b0	This statement is a LIE	Male24-clip15_3semitones_up.mp3	55	Hearing	1	Pitch	Male	Lie	FALSE
943	60c63f4f4ec6385b796de7b0	This statement is TRUE	Female42-clip17pause_control.mp3	56	Hearing	1	Pause	Female	TRUE	TRUE
944	60c63f4f4ec6385b796de7b0	This statement is TRUE	Female42-clip6.mp3	57	Hearing	1	Control	Female	TRUE	TRUE
945	60c63f4f4ec6385b796de7b0	This statement is TRUE	Female15-clip9pause_control.mp3	58	Hearing	1	Pause	Female	TRUE	TRUE
946	60c63f4f4ec6385b796de7b0	This statement is a LIE	Male36-clip15pause_control.mp3	59	Hearing	1	Pause	Male	Lie	FALSE
947	60c63f4f4ec6385b796de7b0	This statement is TRUE	Female42-clip7_3semitones_up.mp3	60	Hearing	1	Pitch	Female	TRUE	TRUE
948	60c63f4f4ec6385b796de7b0	This statement is TRUE	Male36-clip5_3semitones_up.mp3	62	Hearing	1	Pitch	Male	TRUE	TRUE
949	60c63f4f4ec6385b796de7b0	This statement is TRUE	Female42-clip16_3semitones_up.mp3	63	Hearing	1	Pitch	Female	TRUE	TRUE
950	60c63f4f4ec6385b796de7b0	This statement is TRUE	Female15-clip4.mp3	64	Hearing	1	Control	Female	TRUE	TRUE
951	60c63f4f4ec6385b796de7b0	This statement is TRUE	Female15-clip20_3semitones_up.mp3	65	Hearing	1	Pitch	Female	TRUE	TRUE
952	60c63f4f4ec6385b796de7b0	This statement is a LIE	Female42-clip3.mp3	66	Hearing	1	Control	Female	Lie	FALSE
953	60c63f4f4ec6385b796de7b0	This statement is a LIE	Female42-clip2pause_control.mp3	67	Hearing	1	Pause	Female	Lie	FALSE
954	60c63f4f4ec6385b796de7b0	This statement is TRUE	Male24-clip14.mp3	68	Hearing	1	Control	Male	TRUE	TRUE
955	60c63f4f4ec6385b796de7b0	This statement is a LIE	Male24-clip10pause_control.mp3	70	Hearing	1	Pause	Male	Lie	FALSE
956	60c63f4f4ec6385b796de7b0	This statement is TRUE	Female15-clip18pause_control.mp3	71	Hearing	1	Pause	Female	TRUE	TRUE
957	60c63f4f4ec6385b796de7b0	This statement is a LIE	Male36-clip10.mp3	72	Hearing	1	Control	Male	Lie	FALSE
958	60c63f4f4ec6385b796de7b0	This statement is TRUE	Male24-clip22pause_control.mp3	73	Hearing	1	Pause	Male	TRUE	TRUE
959	60c63f4f4ec6385b796de7b0	This statement is TRUE	Male36-clip7.mp3	74	Hearing	1	Control	Male	TRUE	TRUE
960	60c63f4f4ec6385b796de7b0	This statement is TRUE	Female15-clip2_3semitones_up.mp3	75	Hearing	1	Pitch	Female	TRUE	TRUE
961	60c63f4f4ec6385b796de7b0	This statement is a LIE	Female42-clip25_3semitones_up.mp3	76	Hearing	1	Pitch	Female	Lie	FALSE
962	60c63f4f4ec6385b796de7b0	This statement is TRUE	Female15-clip25.mp3	77	Hearing	1	Control	Female	TRUE	TRUE
963	60c63f4f4ec6385b796de7b0	This statement is TRUE	Female42-clip9.mp3	78	Hearing	1	Control	Female	TRUE	TRUE
964	60c63f4f4ec6385b796de7b0	This statement is TRUE	Female42-clip13_3semitones_up.mp3	79	Hearing	1	Pitch	Female	TRUE	TRUE
965	60c63f4f4ec6385b796de7b0	This statement is a LIE	Female42-clip14pause_control.mp3	80	Hearing	1	Pause	Female	Lie	FALSE
966	60c63f4f4ec6385b796de7b0	This statement is TRUE	Male24-clip6_3semitones_up.mp3	81	Hearing	1	Pitch	Male	TRUE	TRUE
967	60c63f4f4ec6385b796de7b0	This statement is TRUE	Male24-clip2.mp3	82	Hearing	1	Control	Male	TRUE	TRUE
968	60c63f4f4ec6385b796de7b0	This statement is TRUE	Male24-clip18_3semitones_up.mp3	83	Hearing	1	Pitch	Male	TRUE	TRUE
969	60c63f4f4ec6385b796de7b0	This statement is TRUE	Male24-clip16pause_control.mp3	84	Hearing	1	Pause	Male	TRUE	TRUE
970	60c63f4f4ec6385b796de7b0	This statement is a LIE	Female15-clip12pause_control.mp3	85	Hearing	1	Pause	Female	Lie	FALSE
971	60c63f4f4ec6385b796de7b0	This statement is TRUE	Female42-clip19_3semitones_up.mp3	86	Hearing	1	Pitch	Female	TRUE	TRUE
972	60c63f4f4ec6385b796de7b0	This statement is TRUE	Female15-clip22.mp3	87	Hearing	1	Control	Female	TRUE	TRUE
973	60c63f4f4ec6385b796de7b0	This statement is a LIE	Male24-clip8.mp3	88	Hearing	1	Control	Male	Lie	FALSE
974	60c63f4f4ec6385b796de7b0	This statement is a LIE	Male24-clip25pause_control.mp3	89	Hearing	1	Pause	Male	Lie	FALSE
975	60c63f4f4ec6385b796de7b0	This statement is TRUE	Female15-clip17_3semitones_up.mp3	90	Hearing	1	Pitch	Female	TRUE	TRUE
976	60c63f4f4ec6385b796de7b0	This statement is TRUE	Male36-clip4.mp3	91	Hearing	1	Control	Male	TRUE	TRUE
977	60c63f4f4ec6385b796de7b0	This statement is a LIE	Female42-clip4_3semitones_up.mp3	92	Hearing	1	Pitch	Female	Lie	FALSE
978	60c63f4f4ec6385b796de7b0	This statement is a LIE	Female42-clip22_3semitones_up.mp3	93	Hearing	1	Pitch	Female	Lie	FALSE
979	60c63f4f4ec6385b796de7b0	This statement is a LIE	Female15-clip24pause_control.mp3	94	Hearing	1	Pause	Female	Lie	FALSE
980	60c63f4f4ec6385b796de7b0	This statement is TRUE	Female15-clip11_3semitones_up.mp3	95	Hearing	1	Pitch	Female	TRUE	TRUE
981	60c63f4f4ec6385b796de7b0	This statement is TRUE	Male24-clip9_3semitones_up.mp3	96	Hearing	1	Pitch	Male	TRUE	TRUE
982	60c63f4f4ec6385b796de7b0	This statement is TRUE	Female42-clip12.mp3	97	Hearing	1	Control	Female	TRUE	TRUE
983	60c63f4f4ec6385b796de7b0	This statement is TRUE	Male36-clip14_3semitones_up.mp3	98	Hearing	1	Pitch	Male	TRUE	TRUE
984	60c63f4f4ec6385b796de7b0	This statement is a LIE	Male24-clip13pause_control.mp3	99	Hearing	1	Pause	Male	Lie	FALSE
985	60c63f4f4ec6385b796de7b0	This statement is TRUE	Male36-clip16.mp3	100	Hearing	1	Control	Male	TRUE	TRUE
986	60c63f4f4ec6385b796de7b0	This statement is a LIE	Male36-clip8_3semitones_up.mp3	101	Hearing	1	Pitch	Male	Lie	FALSE
987	60c63f4f4ec6385b796de7b0	This statement is TRUE	Female15-clip6pause_control.mp3	102	Hearing	1	Pause	Female	TRUE	TRUE
988	60c63f4f4ec6385b796de7b0	This statement is a LIE	Male36-clip20_3semitones_up.mp3	103	Hearing	1	Pitch	Male	Lie	FALSE
989	60c63f4f4ec6385b796de7b0	This statement is a LIE	Male24-clip19pause_control.mp3	104	Hearing	1	Pause	Male	Lie	FALSE
990	60c63f4f4ec6385b796de7b0	This statement is TRUE	Female42-clip11pause_control.mp3	105	Hearing	1	Pause	Female	TRUE	TRUE
991	60c753145bfec328b031273a	This statement is TRUE	Female15-clip1.mp3	1	Hearing	1	Control	Female	TRUE	TRUE
992	60c753145bfec328b031273a	This statement is a LIE	Female15-clip8_3semitones_up.mp3	2	Hearing	1	Pitch	Female	Lie	FALSE
993	60c753145bfec328b031273a	This statement is TRUE	Female42-clip10_3semitones_up.mp3	3	Hearing	1	Pitch	Female	TRUE	TRUE
994	60c753145bfec328b031273a	This statement is TRUE	Female42-clip19_3semitones_up.mp3	4	Hearing	1	Pitch	Female	TRUE	TRUE
995	60c753145bfec328b031273a	This statement is TRUE	Female15-clip22.mp3	5	Hearing	1	Control	Female	TRUE	TRUE
996	60c753145bfec328b031273a	This statement is TRUE	Male36-clip22.mp3	6	Hearing	1	Control	Male	TRUE	TRUE
997	60c753145bfec328b031273a	This statement is TRUE	Male36-clip16.mp3	7	Hearing	1	Control	Male	TRUE	TRUE
998	60c753145bfec328b031273a	This statement is TRUE	Female42-clip23pause_control.mp3	8	Hearing	1	Pause	Female	TRUE	TRUE
999	60c753145bfec328b031273a	This statement is TRUE	Male36-clip18pause_control.mp3	9	Hearing	1	Pause	Male	TRUE	TRUE
1000	60c753145bfec328b031273a	This statement is TRUE	Male24-clip6_3semitones_up.mp3	10	Hearing	1	Pitch	Male	TRUE	TRUE
1001	60c753145bfec328b031273a	This statement is TRUE	Male36-clip10.mp3	11	Hearing	1	Control	Male	TRUE	TRUE
1002	60c753145bfec328b031273a	This statement is TRUE	Male24-clip15_3semitones_up.mp3	12	Hearing	1	Pitch	Male	TRUE	TRUE
1003	60c753145bfec328b031273a	This statement is TRUE	Female15-clip9pause_control.mp3	13	Hearing	1	Pause	Female	TRUE	TRUE
1004	60c753145bfec328b031273a	This statement is a LIE	Female42-clip14pause_control.mp3	14	Hearing	1	Pause	Female	Lie	FALSE
1005	60c753145bfec328b031273a	This statement is TRUE	Female15-clip14_3semitones_up.mp3	15	Hearing	1	Pitch	Female	TRUE	TRUE
1006	60c753145bfec328b031273a	This statement is TRUE	Female15-clip7.mp3	16	Hearing	1	Control	Female	TRUE	TRUE
1007	60c753145bfec328b031273a	This statement is TRUE	Female42-clip22_3semitones_up.mp3	17	Hearing	1	Pitch	Female	TRUE	TRUE
1008	60c753145bfec328b031273a	This statement is TRUE	Female15-clip5_3semitones_up.mp3	18	Hearing	1	Pitch	Female	TRUE	TRUE
1009	60c753145bfec328b031273a	This statement is TRUE	Male24-clip17.mp3	19	Hearing	1	Control	Male	TRUE	TRUE
1010	60c753145bfec328b031273a	This statement is TRUE	Female15-clip23_3semitones_up.mp3	21	Hearing	1	Pitch	Female	TRUE	TRUE
1011	60c753145bfec328b031273a	This statement is TRUE	Female42-clip16_3semitones_up.mp3	23	Hearing	1	Pitch	Female	TRUE	TRUE
1012	60c753145bfec328b031273a	This statement is TRUE	Male36-clip19.mp3	24	Hearing	1	Control	Male	TRUE	TRUE
1013	60c753145bfec328b031273a	This statement is TRUE	Male36-clip17_3semitones_up.mp3	25	Hearing	1	Pitch	Male	TRUE	TRUE
1014	60c753145bfec328b031273a	This statement is TRUE	Male24-clip9_3semitones_up.mp3	26	Hearing	1	Pitch	Male	TRUE	TRUE
1015	60c753145bfec328b031273a	This statement is TRUE	Male24-clip20.mp3	27	Hearing	1	Control	Male	TRUE	TRUE
1016	60c753145bfec328b031273a	This statement is a LIE	Male24-clip1pause_control.mp3	28	Hearing	1	Pause	Male	Lie	FALSE
1017	60c753145bfec328b031273a	This statement is TRUE	Female42-clip21.mp3	29	Hearing	1	Control	Female	TRUE	TRUE
1018	60c753145bfec328b031273a	This statement is TRUE	Male24-clip10pause_control.mp3	30	Hearing	1	Pause	Male	TRUE	TRUE
1019	60c753145bfec328b031273a	This statement is TRUE	Male36-clip14_3semitones_up.mp3	31	Hearing	1	Pitch	Male	TRUE	TRUE
1020	60c753145bfec328b031273a	This statement is TRUE	Female42-clip5pause_control.mp3	32	Hearing	1	Pause	Female	TRUE	TRUE
1021	60c753145bfec328b031273a	This statement is a LIE	Male24-clip8.mp3	33	Hearing	1	Control	Male	Lie	FALSE
1022	60c753145bfec328b031273a	This statement is TRUE	Female15-clip11_3semitones_up.mp3	34	Hearing	1	Pitch	Female	TRUE	TRUE
1023	60c753145bfec328b031273a	This statement is TRUE	Male24-clip14.mp3	35	Hearing	1	Control	Male	TRUE	TRUE
1024	60c753145bfec328b031273a	This statement is TRUE	Female42-clip25_3semitones_up.mp3	36	Hearing	1	Pitch	Female	TRUE	TRUE
1025	60c753145bfec328b031273a	This statement is TRUE	Male24-clip24_3semitones_up.mp3	37	Hearing	1	Pitch	Male	TRUE	TRUE
1026	60c753145bfec328b031273a	This statement is TRUE	Male36-clip20_3semitones_up.mp3	38	Hearing	1	Pitch	Male	TRUE	TRUE
1027	60c753145bfec328b031273a	This statement is TRUE	Female15-clip18pause_control.mp3	39	Hearing	1	Pause	Female	TRUE	TRUE
1028	60c753145bfec328b031273a	This statement is TRUE	Female42-clip20pause_control.mp3	40	Hearing	1	Pause	Female	TRUE	TRUE
1029	60c753145bfec328b031273a	This statement is TRUE	Female42-clip3.mp3	41	Hearing	1	Control	Female	TRUE	TRUE
1030	60c753145bfec328b031273a	This statement is TRUE	Female15-clip17_3semitones_up.mp3	42	Hearing	1	Pitch	Female	TRUE	TRUE
1031	60c753145bfec328b031273a	This statement is TRUE	Male36-clip5_3semitones_up.mp3	44	Hearing	1	Pitch	Male	TRUE	TRUE
1032	60c753145bfec328b031273a	This statement is a LIE	Female15-clip6pause_control.mp3	45	Hearing	1	Pause	Female	Lie	FALSE
1033	60c753145bfec328b031273a	This statement is TRUE	Male24-clip19pause_control.mp3	47	Hearing	1	Pause	Male	TRUE	TRUE
1034	60c753145bfec328b031273a	This statement is TRUE	Male36-clip3pause_control.mp3	48	Hearing	1	Pause	Male	TRUE	TRUE
1035	60c753145bfec328b031273a	This statement is TRUE	Female15-clip24pause_control.mp3	49	Hearing	1	Pause	Female	TRUE	TRUE
1036	60c753145bfec328b031273a	This statement is TRUE	Female15-clip21pause_control.mp3	50	Hearing	1	Pause	Female	TRUE	TRUE
1037	60c753145bfec328b031273a	This statement is TRUE	Female15-clip20_3semitones_up.mp3	51	Hearing	1	Pitch	Female	TRUE	TRUE
1038	60c753145bfec328b031273a	This statement is TRUE	Female15-clip10.mp3	52	Hearing	1	Control	Female	TRUE	TRUE
1039	60c753145bfec328b031273a	This statement is TRUE	Male36-clip7.mp3	53	Hearing	1	Control	Male	TRUE	TRUE
1040	60c753145bfec328b031273a	This statement is a LIE	Male24-clip22pause_control.mp3	54	Hearing	1	Pause	Male	Lie	FALSE
1041	60c753145bfec328b031273a	This statement is TRUE	Female42-clip1_3semitones_up.mp3	55	Hearing	1	Pitch	Female	TRUE	TRUE
1042	60c753145bfec328b031273a	This statement is TRUE	Female15-clip15pauses_control.mp3	56	Hearing	1	Pause	Female	TRUE	TRUE
1043	60c753145bfec328b031273a	This statement is TRUE	Female15-clip2_3semitones_up.mp3	57	Hearing	1	Pitch	Female	TRUE	TRUE
1044	60c753145bfec328b031273a	This statement is TRUE	Female15-clip13.mp3	58	Hearing	1	Control	Female	TRUE	TRUE
1045	60c753145bfec328b031273a	This statement is TRUE	Female42-clip2pause_control.mp3	59	Hearing	1	Pause	Female	TRUE	TRUE
1046	60c753145bfec328b031273a	This statement is TRUE	Male24-clip11.mp3	60	Hearing	1	Control	Male	TRUE	TRUE
1047	60c753145bfec328b031273a	This statement is TRUE	Female15-clip16.mp3	61	Hearing	1	Control	Female	TRUE	TRUE
1048	60c753145bfec328b031273a	This statement is TRUE	Female15-clip4.mp3	62	Hearing	1	Control	Female	TRUE	TRUE
1049	60c753145bfec328b031273a	This statement is TRUE	Female42-clip11pause_control.mp3	63	Hearing	1	Pause	Female	TRUE	TRUE
1050	60c753145bfec328b031273a	This statement is TRUE	Male24-clip23.mp3	64	Hearing	1	Control	Male	TRUE	TRUE
1051	60c753145bfec328b031273a	This statement is a LIE	Male36-clip24pause_control.mp3	65	Hearing	1	Pause	Male	Lie	FALSE
1052	60c753145bfec328b031273a	This statement is TRUE	Female42-clip12.mp3	66	Hearing	1	Control	Female	TRUE	TRUE
1053	60c753145bfec328b031273a	This statement is TRUE	Female42-clip13_3semitones_up.mp3	67	Hearing	1	Pitch	Female	TRUE	TRUE
1054	60c753145bfec328b031273a	This statement is TRUE	Male24-clip4pause_control.mp3	68	Hearing	1	Pause	Male	TRUE	TRUE
1055	60c753145bfec328b031273a	This statement is TRUE	Female15-clip25.mp3	69	Hearing	1	Control	Female	TRUE	TRUE
1056	60c753145bfec328b031273a	This statement is TRUE	Male24-clip18_3semitones_up.mp3	70	Hearing	1	Pitch	Male	TRUE	TRUE
1057	60c753145bfec328b031273a	This statement is TRUE	Male24-clip25pause_control.mp3	71	Hearing	1	Pause	Male	TRUE	TRUE
1058	60c753145bfec328b031273a	This statement is a LIE	Male24-clip21_3semitones_up.mp3	72	Hearing	1	Pitch	Male	Lie	FALSE
1059	60c753145bfec328b031273a	This statement is a LIE	Male36-clip21pause_control.mp3	73	Hearing	1	Pause	Male	Lie	FALSE
1060	60c753145bfec328b031273a	This statement is TRUE	Male24-clip3_3semitones_up.mp3	74	Hearing	1	Pitch	Male	TRUE	TRUE
1061	60c753145bfec328b031273a	This statement is a LIE	Female15-clip3pause_control.mp3	75	Hearing	1	Pause	Female	Lie	FALSE
1062	60c753145bfec328b031273a	This statement is TRUE	Male36-clip11_3semitones_up.mp3	76	Hearing	1	Pitch	Male	TRUE	TRUE
1063	60c753145bfec328b031273a	This statement is TRUE	Male36-clip2_3semitones_up.mp3	77	Hearing	1	Pitch	Male	TRUE	TRUE
1064	60c753145bfec328b031273a	This statement is TRUE	Female15-clip19.mp3	78	Hearing	1	Control	Female	TRUE	TRUE
1065	60c753145bfec328b031273a	This statement is a LIE	Male36-clip8_3semitones_up.mp3	79	Hearing	1	Pitch	Male	Lie	FALSE
1066	60c753145bfec328b031273a	This statement is a LIE	Male36-clip9pause_control.mp3	80	Hearing	1	Pause	Male	Lie	FALSE
1067	60c753145bfec328b031273a	This statement is TRUE	Male36-clip15pause_control.mp3	81	Hearing	1	Pause	Male	TRUE	TRUE
1068	60c753145bfec328b031273a	This statement is TRUE	Male24-clip16pause_control.mp3	82	Hearing	1	Pause	Male	TRUE	TRUE
1069	60c753145bfec328b031273a	This statement is TRUE	Male36-clip23_3semitones_up.mp3	83	Hearing	1	Pitch	Male	TRUE	TRUE
1070	60c753145bfec328b031273a	This statement is TRUE	Female42-clip24.mp3	85	Hearing	1	Control	Female	TRUE	TRUE
1071	60c753145bfec328b031273a	This statement is TRUE	Female42-clip15.mp3	86	Hearing	1	Control	Female	TRUE	TRUE
1072	60c753145bfec328b031273a	This statement is TRUE	Male24-clip12_3semitones_up.mp3	87	Hearing	1	Pitch	Male	TRUE	TRUE
1073	60c753145bfec328b031273a	This statement is TRUE	Male24-clip7pause_control.mp3	88	Hearing	1	Pause	Male	TRUE	TRUE
1074	60c753145bfec328b031273a	This statement is TRUE	Female15-clip12pause_control.mp3	89	Hearing	1	Pause	Female	TRUE	TRUE
1075	60c753145bfec328b031273a	This statement is a LIE	Female42-clip9.mp3	91	Hearing	1	Control	Female	Lie	FALSE
1076	60c753145bfec328b031273a	This statement is TRUE	Male36-clip12pause_control.mp3	92	Hearing	1	Pause	Male	TRUE	TRUE
1077	60c753145bfec328b031273a	This statement is TRUE	Female42-clip6.mp3	93	Hearing	1	Control	Female	TRUE	TRUE
1078	60c753145bfec328b031273a	This statement is TRUE	Female42-clip17pause_control.mp3	94	Hearing	1	Pause	Female	TRUE	TRUE
1079	60c753145bfec328b031273a	This statement is TRUE	Male36-clip13.mp3	95	Hearing	1	Control	Male	TRUE	TRUE
1080	60c753145bfec328b031273a	This statement is TRUE	Male24-clip13pause_control.mp3	96	Hearing	1	Pause	Male	TRUE	TRUE
1081	60c753145bfec328b031273a	This statement is TRUE	Female42-clip7_3semitones_up.mp3	97	Hearing	1	Pitch	Female	TRUE	TRUE
1082	60c753145bfec328b031273a	This statement is TRUE	Male24-clip2.mp3	98	Hearing	1	Control	Male	TRUE	TRUE
1083	60c753145bfec328b031273a	This statement is TRUE	Female42-clip8pause_control.mp3	99	Hearing	1	Pause	Female	TRUE	TRUE
1084	60c753145bfec328b031273a	This statement is TRUE	Female42-clip18.mp3	100	Hearing	1	Control	Female	TRUE	TRUE
1085	60c753145bfec328b031273a	This statement is TRUE	Male36-clip6pause_control.mp3	101	Hearing	1	Pause	Male	TRUE	TRUE
1086	60c753145bfec328b031273a	This statement is TRUE	Male36-clip1.mp3	102	Hearing	1	Control	Male	TRUE	TRUE
1087	60c753145bfec328b031273a	This statement is TRUE	Male24-clip5.mp3	103	Hearing	1	Control	Male	TRUE	TRUE
1088	60c753145bfec328b031273a	This statement is TRUE	Female42-clip4_3semitones_up.mp3	104	Hearing	1	Pitch	Female	TRUE	TRUE
1089	60c753145bfec328b031273a	This statement is TRUE	Male36-clip4.mp3	105	Hearing	1	Control	Male	TRUE	TRUE
1090	60c752eb8f1aa6621ab30f24	This statement is TRUE	Female15-clip1.mp3	1	Hearing	1	Control	Female	TRUE	TRUE
1091	60c752eb8f1aa6621ab30f24	This statement is TRUE	Male36-clip13.mp3	2	Hearing	1	Control	Male	TRUE	TRUE
1092	60c752eb8f1aa6621ab30f24	This statement is a LIE	Male36-clip12pause_control.mp3	3	Hearing	1	Pause	Male	Lie	FALSE
1093	60c752eb8f1aa6621ab30f24	This statement is a LIE	Male36-clip14_3semitones_up.mp3	4	Hearing	1	Pitch	Male	Lie	FALSE
1094	60c752eb8f1aa6621ab30f24	This statement is a LIE	Male24-clip3_3semitones_up.mp3	5	Hearing	1	Pitch	Male	Lie	FALSE
1095	60c752eb8f1aa6621ab30f24	This statement is a LIE	Male36-clip21pause_control.mp3	6	Hearing	1	Pause	Male	Lie	FALSE
1096	60c752eb8f1aa6621ab30f24	This statement is a LIE	Male24-clip18_3semitones_up.mp3	7	Hearing	1	Pitch	Male	Lie	FALSE
1097	60c752eb8f1aa6621ab30f24	This statement is a LIE	Male36-clip10.mp3	8	Hearing	1	Control	Male	Lie	FALSE
1098	60c752eb8f1aa6621ab30f24	This statement is TRUE	Female15-clip13.mp3	9	Hearing	1	Control	Female	TRUE	TRUE
1099	60c752eb8f1aa6621ab30f24	This statement is TRUE	Female15-clip4.mp3	10	Hearing	1	Control	Female	TRUE	TRUE
1100	60c752eb8f1aa6621ab30f24	This statement is a LIE	Female15-clip6pause_control.mp3	11	Hearing	1	Pause	Female	Lie	FALSE
1101	60c752eb8f1aa6621ab30f24	This statement is a LIE	Female15-clip5_3semitones_up.mp3	12	Hearing	1	Pitch	Female	Lie	FALSE
1102	60c752eb8f1aa6621ab30f24	This statement is TRUE	Male36-clip4.mp3	13	Hearing	1	Control	Male	TRUE	TRUE
1103	60c752eb8f1aa6621ab30f24	This statement is TRUE	Female15-clip23_3semitones_up.mp3	14	Hearing	1	Pitch	Female	TRUE	TRUE
1104	60c752eb8f1aa6621ab30f24	This statement is a LIE	Female15-clip8_3semitones_up.mp3	15	Hearing	1	Pitch	Female	Lie	FALSE
1105	60c752eb8f1aa6621ab30f24	This statement is TRUE	Female15-clip15pauses_control.mp3	16	Hearing	1	Pause	Female	TRUE	TRUE
1106	60c752eb8f1aa6621ab30f24	This statement is TRUE	Male24-clip10pause_control.mp3	17	Hearing	1	Pause	Male	TRUE	TRUE
1107	60c752eb8f1aa6621ab30f24	This statement is a LIE	Female42-clip2pause_control.mp3	18	Hearing	1	Pause	Female	Lie	FALSE
1108	60c752eb8f1aa6621ab30f24	This statement is a LIE	Female42-clip7_3semitones_up.mp3	19	Hearing	1	Pitch	Female	Lie	FALSE
1109	60c752eb8f1aa6621ab30f24	This statement is a LIE	Male36-clip24pause_control.mp3	20	Hearing	1	Pause	Male	Lie	FALSE
1110	60c752eb8f1aa6621ab30f24	This statement is a LIE	Female42-clip3.mp3	21	Hearing	1	Control	Female	Lie	FALSE
1111	60c752eb8f1aa6621ab30f24	This statement is a LIE	Male24-clip19pause_control.mp3	22	Hearing	1	Pause	Male	Lie	FALSE
1112	60c752eb8f1aa6621ab30f24	This statement is a LIE	Male24-clip12_3semitones_up.mp3	23	Hearing	1	Pitch	Male	Lie	FALSE
1113	60c752eb8f1aa6621ab30f24	This statement is a LIE	Male24-clip21_3semitones_up.mp3	24	Hearing	1	Pitch	Male	Lie	FALSE
1114	60c752eb8f1aa6621ab30f24	This statement is a LIE	Male36-clip8_3semitones_up.mp3	25	Hearing	1	Pitch	Male	Lie	FALSE
1115	60c752eb8f1aa6621ab30f24	This statement is a LIE	Female42-clip17pause_control.mp3	26	Hearing	1	Pause	Female	Lie	FALSE
1116	60c752eb8f1aa6621ab30f24	This statement is TRUE	Female15-clip20_3semitones_up.mp3	27	Hearing	1	Pitch	Female	TRUE	TRUE
1117	60c752eb8f1aa6621ab30f24	This statement is TRUE	Male24-clip9_3semitones_up.mp3	28	Hearing	1	Pitch	Male	TRUE	TRUE
1118	60c752eb8f1aa6621ab30f24	This statement is a LIE	Male36-clip7.mp3	29	Hearing	1	Control	Male	Lie	FALSE
1119	60c752eb8f1aa6621ab30f24	This statement is TRUE	Female15-clip2_3semitones_up.mp3	30	Hearing	1	Pitch	Female	TRUE	TRUE
1120	60c752eb8f1aa6621ab30f24	This statement is a LIE	Female15-clip22.mp3	31	Hearing	1	Control	Female	Lie	FALSE
1121	60c752eb8f1aa6621ab30f24	This statement is a LIE	Male36-clip15pause_control.mp3	32	Hearing	1	Pause	Male	Lie	FALSE
1122	60c752eb8f1aa6621ab30f24	This statement is a LIE	Female42-clip20pause_control.mp3	33	Hearing	1	Pause	Female	Lie	FALSE
1123	60c752eb8f1aa6621ab30f24	This statement is a LIE	Female42-clip6.mp3	34	Hearing	1	Control	Female	Lie	FALSE
1124	60c752eb8f1aa6621ab30f24	This statement is a LIE	Male24-clip6_3semitones_up.mp3	35	Hearing	1	Pitch	Male	Lie	FALSE
1125	60c752eb8f1aa6621ab30f24	This statement is a LIE	Male24-clip15_3semitones_up.mp3	36	Hearing	1	Pitch	Male	Lie	FALSE
1126	60c752eb8f1aa6621ab30f24	This statement is a LIE	Male36-clip9pause_control.mp3	37	Hearing	1	Pause	Male	Lie	FALSE
1127	60c752eb8f1aa6621ab30f24	This statement is a LIE	Male24-clip5.mp3	38	Hearing	1	Control	Male	Lie	FALSE
1128	60c752eb8f1aa6621ab30f24	This statement is a LIE	Female42-clip10_3semitones_up.mp3	39	Hearing	1	Pitch	Female	Lie	FALSE
1129	60c752eb8f1aa6621ab30f24	This statement is TRUE	Female42-clip23pause_control.mp3	40	Hearing	1	Pause	Female	TRUE	TRUE
1130	60c752eb8f1aa6621ab30f24	This statement is a LIE	Female42-clip11pause_control.mp3	41	Hearing	1	Pause	Female	Lie	FALSE
1131	60c752eb8f1aa6621ab30f24	This statement is a LIE	Male36-clip19.mp3	42	Hearing	1	Control	Male	Lie	FALSE
1132	60c752eb8f1aa6621ab30f24	This statement is TRUE	Male36-clip3pause_control.mp3	44	Hearing	1	Pause	Male	TRUE	TRUE
1133	60c752eb8f1aa6621ab30f24	This statement is a LIE	Female15-clip12pause_control.mp3	45	Hearing	1	Pause	Female	Lie	FALSE
1134	60c752eb8f1aa6621ab30f24	This statement is a LIE	Male36-clip11_3semitones_up.mp3	46	Hearing	1	Pitch	Male	Lie	FALSE
1135	60c752eb8f1aa6621ab30f24	This statement is TRUE	Male24-clip2.mp3	47	Hearing	1	Control	Male	TRUE	TRUE
1136	60c752eb8f1aa6621ab30f24	This statement is a LIE	Male24-clip17.mp3	48	Hearing	1	Control	Male	Lie	FALSE
1137	60c752eb8f1aa6621ab30f24	This statement is a LIE	Female42-clip22_3semitones_up.mp3	49	Hearing	1	Pitch	Female	Lie	FALSE
1138	60c752eb8f1aa6621ab30f24	This statement is TRUE	Male24-clip25pause_control.mp3	50	Hearing	1	Pause	Male	TRUE	TRUE
1139	60c752eb8f1aa6621ab30f24	This statement is TRUE	Female42-clip9.mp3	51	Hearing	1	Control	Female	TRUE	TRUE
1140	60c752eb8f1aa6621ab30f24	This statement is TRUE	Male36-clip1.mp3	52	Hearing	1	Control	Male	TRUE	TRUE
1141	60c752eb8f1aa6621ab30f24	This statement is a LIE	Male36-clip6pause_control.mp3	53	Hearing	1	Pause	Male	Lie	FALSE
1142	60c752eb8f1aa6621ab30f24	This statement is a LIE	Male36-clip20_3semitones_up.mp3	54	Hearing	1	Pitch	Male	Lie	FALSE
1143	60c752eb8f1aa6621ab30f24	This statement is a LIE	Female15-clip16.mp3	55	Hearing	1	Control	Female	Lie	FALSE
1144	60c752eb8f1aa6621ab30f24	This statement is a LIE	Female15-clip25.mp3	56	Hearing	1	Control	Female	Lie	FALSE
1145	60c752eb8f1aa6621ab30f24	This statement is a LIE	Female42-clip4_3semitones_up.mp3	57	Hearing	1	Pitch	Female	Lie	FALSE
1146	60c752eb8f1aa6621ab30f24	This statement is a LIE	Female42-clip14pause_control.mp3	58	Hearing	1	Pause	Female	Lie	FALSE
1147	60c752eb8f1aa6621ab30f24	This statement is a LIE	Female42-clip24.mp3	59	Hearing	1	Control	Female	Lie	FALSE
1148	60c752eb8f1aa6621ab30f24	This statement is a LIE	Female15-clip24pause_control.mp3	60	Hearing	1	Pause	Female	Lie	FALSE
1149	60c752eb8f1aa6621ab30f24	This statement is a LIE	Female15-clip21pause_control.mp3	61	Hearing	1	Pause	Female	Lie	FALSE
1150	60c752eb8f1aa6621ab30f24	This statement is a LIE	Male36-clip23_3semitones_up.mp3	62	Hearing	1	Pitch	Male	Lie	FALSE
1151	60c752eb8f1aa6621ab30f24	This statement is a LIE	Male24-clip22pause_control.mp3	63	Hearing	1	Pause	Male	Lie	FALSE
1152	60c752eb8f1aa6621ab30f24	This statement is a LIE	Female15-clip11_3semitones_up.mp3	64	Hearing	1	Pitch	Female	Lie	FALSE
1153	60c752eb8f1aa6621ab30f24	This statement is a LIE	Female42-clip25_3semitones_up.mp3	65	Hearing	1	Pitch	Female	Lie	FALSE
1154	60c752eb8f1aa6621ab30f24	This statement is a LIE	Male36-clip18pause_control.mp3	67	Hearing	1	Pause	Male	Lie	FALSE
1155	60c752eb8f1aa6621ab30f24	This statement is a LIE	Male24-clip8.mp3	68	Hearing	1	Control	Male	Lie	FALSE
1156	60c752eb8f1aa6621ab30f24	This statement is a LIE	Male36-clip5_3semitones_up.mp3	69	Hearing	1	Pitch	Male	Lie	FALSE
1157	60c752eb8f1aa6621ab30f24	This statement is TRUE	Male24-clip20.mp3	70	Hearing	1	Control	Male	TRUE	TRUE
1158	60c752eb8f1aa6621ab30f24	This statement is TRUE	Male24-clip24_3semitones_up.mp3	71	Hearing	1	Pitch	Male	TRUE	TRUE
1159	60c752eb8f1aa6621ab30f24	This statement is TRUE	Female15-clip18pause_control.mp3	72	Hearing	1	Pause	Female	TRUE	TRUE
1160	60c752eb8f1aa6621ab30f24	This statement is a LIE	Female42-clip21.mp3	73	Hearing	1	Control	Female	Lie	FALSE
1161	60c752eb8f1aa6621ab30f24	This statement is a LIE	Female42-clip13_3semitones_up.mp3	74	Hearing	1	Pitch	Female	Lie	FALSE
1162	60c752eb8f1aa6621ab30f24	This statement is a LIE	Female15-clip17_3semitones_up.mp3	76	Hearing	1	Pitch	Female	Lie	FALSE
1163	60c752eb8f1aa6621ab30f24	This statement is TRUE	Female42-clip5pause_control.mp3	77	Hearing	1	Pause	Female	TRUE	TRUE
1164	60c752eb8f1aa6621ab30f24	This statement is a LIE	Male36-clip2_3semitones_up.mp3	78	Hearing	1	Pitch	Male	Lie	FALSE
1165	60c752eb8f1aa6621ab30f24	This statement is TRUE	Male24-clip11.mp3	79	Hearing	1	Control	Male	TRUE	TRUE
1166	60c752eb8f1aa6621ab30f24	This statement is a LIE	Male24-clip23.mp3	80	Hearing	1	Control	Male	Lie	FALSE
1167	60c752eb8f1aa6621ab30f24	This statement is a LIE	Male36-clip17_3semitones_up.mp3	81	Hearing	1	Pitch	Male	Lie	FALSE
1168	60c752eb8f1aa6621ab30f24	This statement is TRUE	Male24-clip1pause_control.mp3	83	Hearing	1	Pause	Male	TRUE	TRUE
1169	60c752eb8f1aa6621ab30f24	This statement is a LIE	Female15-clip3pause_control.mp3	84	Hearing	1	Pause	Female	Lie	FALSE
1170	60c752eb8f1aa6621ab30f24	This statement is a LIE	Male24-clip13pause_control.mp3	85	Hearing	1	Pause	Male	Lie	FALSE
1171	60c752eb8f1aa6621ab30f24	This statement is a LIE	Male24-clip14.mp3	86	Hearing	1	Control	Male	Lie	FALSE
1172	60c752eb8f1aa6621ab30f24	This statement is TRUE	Female42-clip18.mp3	87	Hearing	1	Control	Female	TRUE	TRUE
1173	60c752eb8f1aa6621ab30f24	This statement is TRUE	Male24-clip16pause_control.mp3	88	Hearing	1	Pause	Male	TRUE	TRUE
1174	60c752eb8f1aa6621ab30f24	This statement is TRUE	Male36-clip16.mp3	89	Hearing	1	Control	Male	TRUE	TRUE
1175	60c752eb8f1aa6621ab30f24	This statement is a LIE	Female15-clip7.mp3	90	Hearing	1	Control	Female	Lie	FALSE
1176	60c752eb8f1aa6621ab30f24	This statement is a LIE	Male24-clip7pause_control.mp3	91	Hearing	1	Pause	Male	Lie	FALSE
1177	60c752eb8f1aa6621ab30f24	This statement is a LIE	Female42-clip8pause_control.mp3	92	Hearing	1	Pause	Female	Lie	FALSE
1178	60c752eb8f1aa6621ab30f24	This statement is TRUE	Male24-clip4pause_control.mp3	94	Hearing	1	Pause	Male	TRUE	TRUE
1179	60c752eb8f1aa6621ab30f24	This statement is TRUE	Female42-clip16_3semitones_up.mp3	95	Hearing	1	Pitch	Female	TRUE	TRUE
1180	60c752eb8f1aa6621ab30f24	This statement is TRUE	Female42-clip19_3semitones_up.mp3	96	Hearing	1	Pitch	Female	TRUE	TRUE
1181	60c752eb8f1aa6621ab30f24	This statement is a LIE	Male36-clip22.mp3	97	Hearing	1	Control	Male	Lie	FALSE
1182	60c752eb8f1aa6621ab30f24	This statement is a LIE	Female15-clip9pause_control.mp3	98	Hearing	1	Pause	Female	Lie	FALSE
1183	60c752eb8f1aa6621ab30f24	This statement is a LIE	Female15-clip14_3semitones_up.mp3	99	Hearing	1	Pitch	Female	Lie	FALSE
1184	60c752eb8f1aa6621ab30f24	This statement is TRUE	Female42-clip15.mp3	101	Hearing	1	Control	Female	TRUE	TRUE
1185	60c752eb8f1aa6621ab30f24	This statement is TRUE	Female15-clip10.mp3	102	Hearing	1	Control	Female	TRUE	TRUE
1186	60c752eb8f1aa6621ab30f24	This statement is a LIE	Female42-clip1_3semitones_up.mp3	103	Hearing	1	Pitch	Female	Lie	FALSE
1187	60c752eb8f1aa6621ab30f24	This statement is a LIE	Female15-clip19.mp3	104	Hearing	1	Control	Female	Lie	FALSE
1188	60c752eb8f1aa6621ab30f24	This statement is a LIE	Female42-clip12.mp3	105	Hearing	1	Control	Female	Lie	FALSE
1189	60cb8f54db340322718d92a4	This statement is TRUE	Female15-clip1.mp3	1	Hearing	1	Control	Female	TRUE	TRUE
1190	60cb8f54db340322718d92a4	This statement is TRUE	Female15-clip25.mp3	2	Hearing	1	Control	Female	TRUE	TRUE
1191	60cb8f54db340322718d92a4	This statement is TRUE	Male24-clip12_3semitones_up.mp3	3	Hearing	1	Pitch	Male	TRUE	TRUE
1192	60cb8f54db340322718d92a4	This statement is a LIE	Male36-clip9pause_control.mp3	4	Hearing	1	Pause	Male	Lie	FALSE
1193	60cb8f54db340322718d92a4	This statement is TRUE	Male24-clip24_3semitones_up.mp3	5	Hearing	1	Pitch	Male	TRUE	TRUE
1194	60cb8f54db340322718d92a4	This statement is TRUE	Female15-clip11_3semitones_up.mp3	6	Hearing	1	Pitch	Female	TRUE	TRUE
1195	60cb8f54db340322718d92a4	This statement is a LIE	Male36-clip3pause_control.mp3	7	Hearing	1	Pause	Male	Lie	FALSE
1196	60cb8f54db340322718d92a4	This statement is TRUE	Male24-clip21_3semitones_up.mp3	8	Hearing	1	Pitch	Male	TRUE	TRUE
1197	60cb8f54db340322718d92a4	This statement is a LIE	Male24-clip16pause_control.mp3	9	Hearing	1	Pause	Male	Lie	FALSE
1198	60cb8f54db340322718d92a4	This statement is a LIE	Female15-clip6pause_control.mp3	10	Hearing	1	Pause	Female	Lie	FALSE
1199	60cb8f54db340322718d92a4	This statement is a LIE	Female15-clip3pause_control.mp3	11	Hearing	1	Pause	Female	Lie	FALSE
1200	60cb8f54db340322718d92a4	This statement is TRUE	Male36-clip22.mp3	12	Hearing	1	Control	Male	TRUE	TRUE
1201	60cb8f54db340322718d92a4	This statement is a LIE	Female15-clip24pause_control.mp3	13	Hearing	1	Pause	Female	Lie	FALSE
1202	60cb8f54db340322718d92a4	This statement is TRUE	Female42-clip10_3semitones_up.mp3	14	Hearing	1	Pitch	Female	TRUE	TRUE
1203	60cb8f54db340322718d92a4	This statement is TRUE	Male24-clip17.mp3	15	Hearing	1	Control	Male	TRUE	TRUE
1204	60cb8f54db340322718d92a4	This statement is a LIE	Female15-clip22.mp3	16	Hearing	1	Control	Female	Lie	FALSE
1205	60cb8f54db340322718d92a4	This statement is TRUE	Female15-clip20_3semitones_up.mp3	17	Hearing	1	Pitch	Female	TRUE	TRUE
1206	60cb8f54db340322718d92a4	This statement is TRUE	Female42-clip6.mp3	18	Hearing	1	Control	Female	TRUE	TRUE
1207	60cb8f54db340322718d92a4	This statement is TRUE	Female42-clip23pause_control.mp3	19	Hearing	1	Pause	Female	TRUE	TRUE
1208	60cb8f54db340322718d92a4	This statement is TRUE	Male36-clip8_3semitones_up.mp3	20	Hearing	1	Pitch	Male	TRUE	TRUE
1209	60cb8f54db340322718d92a4	This statement is TRUE	Female15-clip14_3semitones_up.mp3	21	Hearing	1	Pitch	Female	TRUE	TRUE
1210	60cb8f54db340322718d92a4	This statement is a LIE	Female15-clip15pauses_control.mp3	22	Hearing	1	Pause	Female	Lie	FALSE
1211	60cb8f54db340322718d92a4	This statement is TRUE	Female42-clip13_3semitones_up.mp3	23	Hearing	1	Pitch	Female	TRUE	TRUE
1212	60cb8f54db340322718d92a4	This statement is TRUE	Male36-clip1.mp3	24	Hearing	1	Control	Male	TRUE	TRUE
1213	60cb8f54db340322718d92a4	This statement is TRUE	Female42-clip25_3semitones_up.mp3	25	Hearing	1	Pitch	Female	TRUE	TRUE
1214	60cb8f54db340322718d92a4	This statement is TRUE	Male24-clip11.mp3	26	Hearing	1	Control	Male	TRUE	TRUE
1215	60cb8f54db340322718d92a4	This statement is a LIE	Female42-clip17pause_control.mp3	27	Hearing	1	Pause	Female	Lie	FALSE
1216	60cb8f54db340322718d92a4	This statement is TRUE	Male24-clip23.mp3	28	Hearing	1	Control	Male	TRUE	TRUE
1217	60cb8f54db340322718d92a4	This statement is a LIE	Female42-clip24.mp3	29	Hearing	1	Control	Female	Lie	FALSE
1218	60cb8f54db340322718d92a4	This statement is a LIE	Male24-clip9_3semitones_up.mp3	30	Hearing	1	Pitch	Male	Lie	FALSE
1219	60cb8f54db340322718d92a4	This statement is TRUE	Male36-clip11_3semitones_up.mp3	31	Hearing	1	Pitch	Male	TRUE	TRUE
1220	60cb8f54db340322718d92a4	This statement is TRUE	Male24-clip14.mp3	32	Hearing	1	Control	Male	TRUE	TRUE
1221	60cb8f54db340322718d92a4	This statement is TRUE	Female42-clip18.mp3	33	Hearing	1	Control	Female	TRUE	TRUE
1222	60cb8f54db340322718d92a4	This statement is a LIE	Female42-clip1_3semitones_up.mp3	34	Hearing	1	Pitch	Female	Lie	FALSE
1223	60cb8f54db340322718d92a4	This statement is TRUE	Male36-clip18pause_control.mp3	35	Hearing	1	Pause	Male	TRUE	TRUE
1224	60cb8f54db340322718d92a4	This statement is a LIE	Male24-clip1pause_control.mp3	36	Hearing	1	Pause	Male	Lie	FALSE
1225	60cb8f54db340322718d92a4	This statement is a LIE	Female42-clip3.mp3	37	Hearing	1	Control	Female	Lie	FALSE
1226	60cb8f54db340322718d92a4	This statement is TRUE	Female15-clip4.mp3	38	Hearing	1	Control	Female	TRUE	TRUE
1227	60cb8f54db340322718d92a4	This statement is a LIE	Male36-clip15pause_control.mp3	39	Hearing	1	Pause	Male	Lie	FALSE
1228	60cb8f54db340322718d92a4	This statement is a LIE	Female42-clip15.mp3	40	Hearing	1	Control	Female	Lie	FALSE
1229	60cb8f54db340322718d92a4	This statement is a LIE	Female15-clip21pause_control.mp3	41	Hearing	1	Pause	Female	Lie	FALSE
1230	60cb8f54db340322718d92a4	This statement is TRUE	Female42-clip19_3semitones_up.mp3	42	Hearing	1	Pitch	Female	TRUE	TRUE
1231	60cb8f54db340322718d92a4	This statement is TRUE	Female15-clip7.mp3	43	Hearing	1	Control	Female	TRUE	TRUE
1232	60cb8f54db340322718d92a4	This statement is TRUE	Female15-clip18pause_control.mp3	44	Hearing	1	Pause	Female	TRUE	TRUE
1233	60cb8f54db340322718d92a4	This statement is TRUE	Male24-clip18_3semitones_up.mp3	45	Hearing	1	Pitch	Male	TRUE	TRUE
1234	60cb8f54db340322718d92a4	This statement is TRUE	Female15-clip16.mp3	46	Hearing	1	Control	Female	TRUE	TRUE
1235	60cb8f54db340322718d92a4	This statement is a LIE	Male24-clip3_3semitones_up.mp3	47	Hearing	1	Pitch	Male	Lie	FALSE
1236	60cb8f54db340322718d92a4	This statement is a LIE	Male36-clip23_3semitones_up.mp3	48	Hearing	1	Pitch	Male	Lie	FALSE
1237	60cb8f54db340322718d92a4	This statement is TRUE	Female15-clip12pause_control.mp3	50	Hearing	1	Pause	Female	TRUE	TRUE
1238	60cb8f54db340322718d92a4	This statement is TRUE	Male24-clip15_3semitones_up.mp3	51	Hearing	1	Pitch	Male	TRUE	TRUE
1239	60cb8f54db340322718d92a4	This statement is TRUE	Male24-clip7pause_control.mp3	52	Hearing	1	Pause	Male	TRUE	TRUE
1240	60cb8f54db340322718d92a4	This statement is TRUE	Male24-clip6_3semitones_up.mp3	53	Hearing	1	Pitch	Male	TRUE	TRUE
1241	60cb8f54db340322718d92a4	This statement is a LIE	Female42-clip14pause_control.mp3	54	Hearing	1	Pause	Female	Lie	FALSE
1242	60cb8f54db340322718d92a4	This statement is a LIE	Male36-clip20_3semitones_up.mp3	56	Hearing	1	Pitch	Male	Lie	FALSE
1243	60cb8f54db340322718d92a4	This statement is TRUE	Male24-clip13pause_control.mp3	57	Hearing	1	Pause	Male	TRUE	TRUE
1244	60cb8f54db340322718d92a4	This statement is TRUE	Male36-clip6pause_control.mp3	58	Hearing	1	Pause	Male	TRUE	TRUE
1245	60cb8f54db340322718d92a4	This statement is TRUE	Female42-clip4_3semitones_up.mp3	59	Hearing	1	Pitch	Female	TRUE	TRUE
1246	60cb8f54db340322718d92a4	This statement is TRUE	Male36-clip13.mp3	60	Hearing	1	Control	Male	TRUE	TRUE
1247	60cb8f54db340322718d92a4	This statement is TRUE	Female15-clip2_3semitones_up.mp3	61	Hearing	1	Pitch	Female	TRUE	TRUE
1248	60cb8f54db340322718d92a4	This statement is a LIE	Male24-clip25pause_control.mp3	62	Hearing	1	Pause	Male	Lie	FALSE
1249	60cb8f54db340322718d92a4	This statement is TRUE	Female42-clip7_3semitones_up.mp3	63	Hearing	1	Pitch	Female	TRUE	TRUE
1250	60cb8f54db340322718d92a4	This statement is TRUE	Male36-clip16.mp3	64	Hearing	1	Control	Male	TRUE	TRUE
1251	60cb8f54db340322718d92a4	This statement is TRUE	Male36-clip10.mp3	65	Hearing	1	Control	Male	TRUE	TRUE
1252	60cb8f54db340322718d92a4	This statement is TRUE	Male36-clip7.mp3	67	Hearing	1	Control	Male	TRUE	TRUE
1253	60cb8f54db340322718d92a4	This statement is a LIE	Female42-clip5pause_control.mp3	68	Hearing	1	Pause	Female	Lie	FALSE
1254	60cb8f54db340322718d92a4	This statement is TRUE	Female15-clip13.mp3	69	Hearing	1	Control	Female	TRUE	TRUE
1255	60cb8f54db340322718d92a4	This statement is TRUE	Male36-clip17_3semitones_up.mp3	72	Hearing	1	Pitch	Male	TRUE	TRUE
1256	60cb8f54db340322718d92a4	This statement is TRUE	Male36-clip5_3semitones_up.mp3	73	Hearing	1	Pitch	Male	TRUE	TRUE
1257	60cb8f54db340322718d92a4	This statement is TRUE	Female42-clip8pause_control.mp3	74	Hearing	1	Pause	Female	TRUE	TRUE
1258	60cb8f54db340322718d92a4	This statement is a LIE	Male36-clip24pause_control.mp3	75	Hearing	1	Pause	Male	Lie	FALSE
1259	60cb8f54db340322718d92a4	This statement is TRUE	Female15-clip17_3semitones_up.mp3	76	Hearing	1	Pitch	Female	TRUE	TRUE
1260	60cb8f54db340322718d92a4	This statement is a LIE	Male24-clip20.mp3	77	Hearing	1	Control	Male	Lie	FALSE
1261	60cb8f54db340322718d92a4	This statement is a LIE	Female15-clip23_3semitones_up.mp3	78	Hearing	1	Pitch	Female	Lie	FALSE
1262	60cb8f54db340322718d92a4	This statement is TRUE	Female42-clip12.mp3	79	Hearing	1	Control	Female	TRUE	TRUE
1263	60cb8f54db340322718d92a4	This statement is TRUE	Male36-clip4.mp3	80	Hearing	1	Control	Male	TRUE	TRUE
1264	60cb8f54db340322718d92a4	This statement is TRUE	Female42-clip21.mp3	81	Hearing	1	Control	Female	TRUE	TRUE
1265	60cb8f54db340322718d92a4	This statement is TRUE	Male24-clip8.mp3	82	Hearing	1	Control	Male	TRUE	TRUE
1266	60cb8f54db340322718d92a4	This statement is TRUE	Male24-clip22pause_control.mp3	83	Hearing	1	Pause	Male	TRUE	TRUE
1267	60cb8f54db340322718d92a4	This statement is a LIE	Male36-clip21pause_control.mp3	84	Hearing	1	Pause	Male	Lie	FALSE
1268	60cb8f54db340322718d92a4	This statement is TRUE	Male24-clip10pause_control.mp3	85	Hearing	1	Pause	Male	TRUE	TRUE
1269	60cb8f54db340322718d92a4	This statement is a LIE	Male36-clip12pause_control.mp3	86	Hearing	1	Pause	Male	Lie	FALSE
1270	60cb8f54db340322718d92a4	This statement is a LIE	Male24-clip2.mp3	87	Hearing	1	Control	Male	Lie	FALSE
1271	60cb8f54db340322718d92a4	This statement is TRUE	Female42-clip9.mp3	88	Hearing	1	Control	Female	TRUE	TRUE
1272	60cb8f54db340322718d92a4	This statement is TRUE	Female15-clip9pause_control.mp3	89	Hearing	1	Pause	Female	TRUE	TRUE
1273	60cb8f54db340322718d92a4	This statement is TRUE	Female42-clip20pause_control.mp3	90	Hearing	1	Pause	Female	TRUE	TRUE
1274	60cb8f54db340322718d92a4	This statement is TRUE	Male36-clip19.mp3	91	Hearing	1	Control	Male	TRUE	TRUE
1275	60cb8f54db340322718d92a4	This statement is TRUE	Female15-clip10.mp3	92	Hearing	1	Control	Female	TRUE	TRUE
1276	60cb8f54db340322718d92a4	This statement is TRUE	Female15-clip8_3semitones_up.mp3	93	Hearing	1	Pitch	Female	TRUE	TRUE
1277	60cb8f54db340322718d92a4	This statement is TRUE	Female42-clip16_3semitones_up.mp3	94	Hearing	1	Pitch	Female	TRUE	TRUE
1278	60cb8f54db340322718d92a4	This statement is TRUE	Female15-clip19.mp3	95	Hearing	1	Control	Female	TRUE	TRUE
1279	60cb8f54db340322718d92a4	This statement is a LIE	Male24-clip19pause_control.mp3	96	Hearing	1	Pause	Male	Lie	FALSE
1280	60cb8f54db340322718d92a4	This statement is TRUE	Male36-clip14_3semitones_up.mp3	97	Hearing	1	Pitch	Male	TRUE	TRUE
1281	60cb8f54db340322718d92a4	This statement is TRUE	Female42-clip2pause_control.mp3	98	Hearing	1	Pause	Female	TRUE	TRUE
1282	60cb8f54db340322718d92a4	This statement is TRUE	Male24-clip4pause_control.mp3	99	Hearing	1	Pause	Male	TRUE	TRUE
1283	60cb8f54db340322718d92a4	This statement is a LIE	Female42-clip11pause_control.mp3	100	Hearing	1	Pause	Female	Lie	FALSE
1284	60cb8f54db340322718d92a4	This statement is TRUE	Female42-clip22_3semitones_up.mp3	101	Hearing	1	Pitch	Female	TRUE	TRUE
1285	60cb8f54db340322718d92a4	This statement is a LIE	Male24-clip5.mp3	103	Hearing	1	Control	Male	Lie	FALSE
1286	60cb8f54db340322718d92a4	This statement is TRUE	Female15-clip5_3semitones_up.mp3	104	Hearing	1	Pitch	Female	TRUE	TRUE
1287	60cb8f54db340322718d92a4	This statement is TRUE	Male36-clip2_3semitones_up.mp3	105	Hearing	1	Pitch	Male	TRUE	TRUE
1288	60cb8f5837755859d4739f00	This statement is TRUE	Female15-clip1.mp3	1	Hearing	1	Control	Female	TRUE	TRUE
1289	60cb8f5837755859d4739f00	This statement is a LIE	Female15-clip21pause_control.mp3	2	Hearing	1	Pause	Female	Lie	FALSE
1290	60cb8f5837755859d4739f00	This statement is a LIE	Male24-clip20.mp3	3	Hearing	1	Control	Male	Lie	FALSE
1291	60cb8f5837755859d4739f00	This statement is TRUE	Male36-clip19.mp3	4	Hearing	1	Control	Male	TRUE	TRUE
1292	60cb8f5837755859d4739f00	This statement is TRUE	Female42-clip13_3semitones_up.mp3	5	Hearing	1	Pitch	Female	TRUE	TRUE
1293	60cb8f5837755859d4739f00	This statement is TRUE	Male24-clip23.mp3	6	Hearing	1	Control	Male	TRUE	TRUE
1294	60cb8f5837755859d4739f00	This statement is TRUE	Female15-clip22.mp3	7	Hearing	1	Control	Female	TRUE	TRUE
1295	60cb8f5837755859d4739f00	This statement is a LIE	Male36-clip23_3semitones_up.mp3	8	Hearing	1	Pitch	Male	Lie	FALSE
1296	60cb8f5837755859d4739f00	This statement is a LIE	Female15-clip13.mp3	9	Hearing	1	Control	Female	Lie	FALSE
1297	60cb8f5837755859d4739f00	This statement is a LIE	Female42-clip3.mp3	10	Hearing	1	Control	Female	Lie	FALSE
1298	60cb8f5837755859d4739f00	This statement is a LIE	Female42-clip1_3semitones_up.mp3	12	Hearing	1	Pitch	Female	Lie	FALSE
1299	60cb8f5837755859d4739f00	This statement is TRUE	Male36-clip2_3semitones_up.mp3	13	Hearing	1	Pitch	Male	TRUE	TRUE
1300	60cb8f5837755859d4739f00	This statement is TRUE	Female15-clip6pause_control.mp3	14	Hearing	1	Pause	Female	TRUE	TRUE
1301	60cb8f5837755859d4739f00	This statement is a LIE	Female42-clip15.mp3	15	Hearing	1	Control	Female	Lie	FALSE
1302	60cb8f5837755859d4739f00	This statement is TRUE	Male36-clip13.mp3	16	Hearing	1	Control	Male	TRUE	TRUE
1303	60cb8f5837755859d4739f00	This statement is a LIE	Male24-clip2.mp3	17	Hearing	1	Control	Male	Lie	FALSE
1304	60cb8f5837755859d4739f00	This statement is TRUE	Male36-clip6pause_control.mp3	18	Hearing	1	Pause	Male	TRUE	TRUE
1305	60cb8f5837755859d4739f00	This statement is TRUE	Male24-clip9_3semitones_up.mp3	19	Hearing	1	Pitch	Male	TRUE	TRUE
1306	60cb8f5837755859d4739f00	This statement is TRUE	Female42-clip10_3semitones_up.mp3	20	Hearing	1	Pitch	Female	TRUE	TRUE
1307	60cb8f5837755859d4739f00	This statement is a LIE	Female15-clip24pause_control.mp3	21	Hearing	1	Pause	Female	Lie	FALSE
1308	60cb8f5837755859d4739f00	This statement is TRUE	Male24-clip11.mp3	22	Hearing	1	Control	Male	TRUE	TRUE
1309	60cb8f5837755859d4739f00	This statement is TRUE	Male36-clip12pause_control.mp3	23	Hearing	1	Pause	Male	TRUE	TRUE
1310	60cb8f5837755859d4739f00	This statement is TRUE	Female42-clip19_3semitones_up.mp3	24	Hearing	1	Pitch	Female	TRUE	TRUE
1311	60cb8f5837755859d4739f00	This statement is TRUE	Male36-clip16.mp3	25	Hearing	1	Control	Male	TRUE	TRUE
1312	60cb8f5837755859d4739f00	This statement is TRUE	Male36-clip24pause_control.mp3	27	Hearing	1	Pause	Male	TRUE	TRUE
1313	60cb8f5837755859d4739f00	This statement is TRUE	Male36-clip10.mp3	29	Hearing	1	Control	Male	TRUE	TRUE
1314	60cb8f5837755859d4739f00	This statement is TRUE	Female15-clip5_3semitones_up.mp3	30	Hearing	1	Pitch	Female	TRUE	TRUE
1315	60cb8f5837755859d4739f00	This statement is a LIE	Female42-clip14pause_control.mp3	32	Hearing	1	Pause	Female	Lie	FALSE
1316	60cb8f5837755859d4739f00	This statement is TRUE	Female42-clip9.mp3	33	Hearing	1	Control	Female	TRUE	TRUE
1317	60cb8f5837755859d4739f00	This statement is TRUE	Male36-clip8_3semitones_up.mp3	34	Hearing	1	Pitch	Male	TRUE	TRUE
1318	60cb8f5837755859d4739f00	This statement is a LIE	Female15-clip12pause_control.mp3	35	Hearing	1	Pause	Female	Lie	FALSE
1319	60cb8f5837755859d4739f00	This statement is TRUE	Female15-clip17_3semitones_up.mp3	36	Hearing	1	Pitch	Female	TRUE	TRUE
1320	60cb8f5837755859d4739f00	This statement is TRUE	Male24-clip12_3semitones_up.mp3	37	Hearing	1	Pitch	Male	TRUE	TRUE
1321	60cb8f5837755859d4739f00	This statement is TRUE	Female42-clip25_3semitones_up.mp3	38	Hearing	1	Pitch	Female	TRUE	TRUE
1322	60cb8f5837755859d4739f00	This statement is TRUE	Male36-clip21pause_control.mp3	39	Hearing	1	Pause	Male	TRUE	TRUE
1323	60cb8f5837755859d4739f00	This statement is a LIE	Male24-clip7pause_control.mp3	40	Hearing	1	Pause	Male	Lie	FALSE
1324	60cb8f5837755859d4739f00	This statement is TRUE	Female42-clip6.mp3	41	Hearing	1	Control	Female	TRUE	TRUE
1325	60cb8f5837755859d4739f00	This statement is a LIE	Female15-clip9pause_control.mp3	42	Hearing	1	Pause	Female	Lie	FALSE
1326	60cb8f5837755859d4739f00	This statement is a LIE	Female42-clip20pause_control.mp3	43	Hearing	1	Pause	Female	Lie	FALSE
1327	60cb8f5837755859d4739f00	This statement is TRUE	Male24-clip6_3semitones_up.mp3	44	Hearing	1	Pitch	Male	TRUE	TRUE
1328	60cb8f5837755859d4739f00	This statement is TRUE	Male36-clip3pause_control.mp3	45	Hearing	1	Pause	Male	TRUE	TRUE
1329	60cb8f5837755859d4739f00	This statement is TRUE	Male24-clip13pause_control.mp3	46	Hearing	1	Pause	Male	TRUE	TRUE
1330	60cb8f5837755859d4739f00	This statement is TRUE	Female42-clip12.mp3	47	Hearing	1	Control	Female	TRUE	TRUE
1331	60cb8f5837755859d4739f00	This statement is TRUE	Female42-clip7_3semitones_up.mp3	48	Hearing	1	Pitch	Female	TRUE	TRUE
1332	60cb8f5837755859d4739f00	This statement is TRUE	Male24-clip24_3semitones_up.mp3	49	Hearing	1	Pitch	Male	TRUE	TRUE
1333	60cb8f5837755859d4739f00	This statement is TRUE	Male36-clip17_3semitones_up.mp3	50	Hearing	1	Pitch	Male	TRUE	TRUE
1334	60cb8f5837755859d4739f00	This statement is TRUE	Male24-clip10pause_control.mp3	51	Hearing	1	Pause	Male	TRUE	TRUE
1335	60cb8f5837755859d4739f00	This statement is TRUE	Female42-clip18.mp3	52	Hearing	1	Control	Female	TRUE	TRUE
1336	60cb8f5837755859d4739f00	This statement is TRUE	Female42-clip5pause_control.mp3	53	Hearing	1	Pause	Female	TRUE	TRUE
1337	60cb8f5837755859d4739f00	This statement is a LIE	Male24-clip5.mp3	54	Hearing	1	Control	Male	Lie	FALSE
1338	60cb8f5837755859d4739f00	This statement is TRUE	Female15-clip19.mp3	55	Hearing	1	Control	Female	TRUE	TRUE
1339	60cb8f5837755859d4739f00	This statement is TRUE	Female15-clip14_3semitones_up.mp3	56	Hearing	1	Pitch	Female	TRUE	TRUE
1340	60cb8f5837755859d4739f00	This statement is TRUE	Male24-clip16pause_control.mp3	57	Hearing	1	Pause	Male	TRUE	TRUE
1341	60cb8f5837755859d4739f00	This statement is a LIE	Female42-clip11pause_control.mp3	58	Hearing	1	Pause	Female	Lie	FALSE
1342	60cb8f5837755859d4739f00	This statement is a LIE	Male24-clip15_3semitones_up.mp3	59	Hearing	1	Pitch	Male	Lie	FALSE
1343	60cb8f5837755859d4739f00	This statement is TRUE	Female15-clip4.mp3	60	Hearing	1	Control	Female	TRUE	TRUE
1344	60cb8f5837755859d4739f00	This statement is TRUE	Female15-clip20_3semitones_up.mp3	61	Hearing	1	Pitch	Female	TRUE	TRUE
1345	60cb8f5837755859d4739f00	This statement is a LIE	Female15-clip15pauses_control.mp3	62	Hearing	1	Pause	Female	Lie	FALSE
1346	60cb8f5837755859d4739f00	This statement is a LIE	Female42-clip23pause_control.mp3	63	Hearing	1	Pause	Female	Lie	FALSE
1347	60cb8f5837755859d4739f00	This statement is TRUE	Female15-clip7.mp3	64	Hearing	1	Control	Female	TRUE	TRUE
1348	60cb8f5837755859d4739f00	This statement is TRUE	Female15-clip8_3semitones_up.mp3	65	Hearing	1	Pitch	Female	TRUE	TRUE
1349	60cb8f5837755859d4739f00	This statement is TRUE	Male24-clip8.mp3	66	Hearing	1	Control	Male	TRUE	TRUE
1350	60cb8f5837755859d4739f00	This statement is TRUE	Female15-clip3pause_control.mp3	67	Hearing	1	Pause	Female	TRUE	TRUE
1351	60cb8f5837755859d4739f00	This statement is TRUE	Female15-clip2_3semitones_up.mp3	68	Hearing	1	Pitch	Female	TRUE	TRUE
1352	60cb8f5837755859d4739f00	This statement is TRUE	Female15-clip10.mp3	69	Hearing	1	Control	Female	TRUE	TRUE
1353	60cb8f5837755859d4739f00	This statement is a LIE	Male24-clip21_3semitones_up.mp3	70	Hearing	1	Pitch	Male	Lie	FALSE
1354	60cb8f5837755859d4739f00	This statement is a LIE	Female15-clip11_3semitones_up.mp3	71	Hearing	1	Pitch	Female	Lie	FALSE
1355	60cb8f5837755859d4739f00	This statement is a LIE	Male36-clip1.mp3	72	Hearing	1	Control	Male	Lie	FALSE
1356	60cb8f5837755859d4739f00	This statement is TRUE	Female15-clip23_3semitones_up.mp3	73	Hearing	1	Pitch	Female	TRUE	TRUE
1357	60cb8f5837755859d4739f00	This statement is a LIE	Female42-clip8pause_control.mp3	74	Hearing	1	Pause	Female	Lie	FALSE
1358	60cb8f5837755859d4739f00	This statement is TRUE	Male36-clip11_3semitones_up.mp3	75	Hearing	1	Pitch	Male	TRUE	TRUE
1359	60cb8f5837755859d4739f00	This statement is TRUE	Male24-clip14.mp3	77	Hearing	1	Control	Male	TRUE	TRUE
1360	60cb8f5837755859d4739f00	This statement is TRUE	Male24-clip18_3semitones_up.mp3	78	Hearing	1	Pitch	Male	TRUE	TRUE
1361	60cb8f5837755859d4739f00	This statement is TRUE	Male36-clip20_3semitones_up.mp3	79	Hearing	1	Pitch	Male	TRUE	TRUE
1362	60cb8f5837755859d4739f00	This statement is TRUE	Female15-clip18pause_control.mp3	80	Hearing	1	Pause	Female	TRUE	TRUE
1363	60cb8f5837755859d4739f00	This statement is TRUE	Female42-clip22_3semitones_up.mp3	81	Hearing	1	Pitch	Female	TRUE	TRUE
1364	60cb8f5837755859d4739f00	This statement is TRUE	Female15-clip16.mp3	82	Hearing	1	Control	Female	TRUE	TRUE
1365	60cb8f5837755859d4739f00	This statement is TRUE	Female42-clip2pause_control.mp3	83	Hearing	1	Pause	Female	TRUE	TRUE
1366	60cb8f5837755859d4739f00	This statement is TRUE	Male24-clip4pause_control.mp3	84	Hearing	1	Pause	Male	TRUE	TRUE
1367	60cb8f5837755859d4739f00	This statement is a LIE	Male36-clip9pause_control.mp3	85	Hearing	1	Pause	Male	Lie	FALSE
1368	60cb8f5837755859d4739f00	This statement is a LIE	Male36-clip15pause_control.mp3	86	Hearing	1	Pause	Male	Lie	FALSE
1369	60cb8f5837755859d4739f00	This statement is TRUE	Female42-clip17pause_control.mp3	87	Hearing	1	Pause	Female	TRUE	TRUE
1370	60cb8f5837755859d4739f00	This statement is TRUE	Male24-clip22pause_control.mp3	88	Hearing	1	Pause	Male	TRUE	TRUE
1371	60cb8f5837755859d4739f00	This statement is TRUE	Male24-clip17.mp3	89	Hearing	1	Control	Male	TRUE	TRUE
1372	60cb8f5837755859d4739f00	This statement is a LIE	Male24-clip25pause_control.mp3	90	Hearing	1	Pause	Male	Lie	FALSE
1373	60cb8f5837755859d4739f00	This statement is a LIE	Male24-clip3_3semitones_up.mp3	91	Hearing	1	Pitch	Male	Lie	FALSE
1374	60cb8f5837755859d4739f00	This statement is TRUE	Male36-clip14_3semitones_up.mp3	92	Hearing	1	Pitch	Male	TRUE	TRUE
1375	60cb8f5837755859d4739f00	This statement is TRUE	Male36-clip18pause_control.mp3	93	Hearing	1	Pause	Male	TRUE	TRUE
1376	60cb8f5837755859d4739f00	This statement is TRUE	Male24-clip19pause_control.mp3	94	Hearing	1	Pause	Male	TRUE	TRUE
1377	60cb8f5837755859d4739f00	This statement is TRUE	Male36-clip4.mp3	95	Hearing	1	Control	Male	TRUE	TRUE
1378	60cb8f5837755859d4739f00	This statement is TRUE	Male36-clip7.mp3	96	Hearing	1	Control	Male	TRUE	TRUE
1379	60cb8f5837755859d4739f00	This statement is TRUE	Male24-clip1pause_control.mp3	97	Hearing	1	Pause	Male	TRUE	TRUE
1380	60cb8f5837755859d4739f00	This statement is TRUE	Female42-clip4_3semitones_up.mp3	99	Hearing	1	Pitch	Female	TRUE	TRUE
1381	60cb8f5837755859d4739f00	This statement is a LIE	Female15-clip25.mp3	100	Hearing	1	Control	Female	Lie	FALSE
1382	60cb8f5837755859d4739f00	This statement is TRUE	Female42-clip16_3semitones_up.mp3	101	Hearing	1	Pitch	Female	TRUE	TRUE
1383	60cb8f5837755859d4739f00	This statement is TRUE	Male36-clip5_3semitones_up.mp3	102	Hearing	1	Pitch	Male	TRUE	TRUE
1384	60cb8f5837755859d4739f00	This statement is a LIE	Female42-clip24.mp3	103	Hearing	1	Control	Female	Lie	FALSE
1385	60cb8f5837755859d4739f00	This statement is TRUE	Male36-clip22.mp3	104	Hearing	1	Control	Male	TRUE	TRUE
1386	60cb8f5837755859d4739f00	This statement is TRUE	Female42-clip21.mp3	105	Hearing	1	Control	Female	TRUE	TRUE
1387	60cc64ed080841dd23062b3e	This statement is a LIE	Female15-clip1.mp3	1	Hearing	1	Control	Female	Lie	FALSE
1388	60cc64ed080841dd23062b3e	This statement is TRUE	Female15-clip3pause_control.mp3	2	Hearing	1	Pause	Female	TRUE	TRUE
1389	60cc64ed080841dd23062b3e	This statement is a LIE	Female42-clip1_3semitones_up.mp3	3	Hearing	1	Pitch	Female	Lie	FALSE
1390	60cc64ed080841dd23062b3e	This statement is TRUE	Male36-clip1.mp3	4	Hearing	1	Control	Male	TRUE	TRUE
1391	60cc64ed080841dd23062b3e	This statement is a LIE	Female42-clip13_3semitones_up.mp3	6	Hearing	1	Pitch	Female	Lie	FALSE
1392	60cc64ed080841dd23062b3e	This statement is a LIE	Female42-clip8pause_control.mp3	7	Hearing	1	Pause	Female	Lie	FALSE
1393	60cc64ed080841dd23062b3e	This statement is TRUE	Female42-clip22_3semitones_up.mp3	8	Hearing	1	Pitch	Female	TRUE	TRUE
1394	60cc64ed080841dd23062b3e	This statement is TRUE	Female42-clip9.mp3	9	Hearing	1	Control	Female	TRUE	TRUE
1395	60cc64ed080841dd23062b3e	This statement is a LIE	Male24-clip8.mp3	10	Hearing	1	Control	Male	Lie	FALSE
1396	60cc64ed080841dd23062b3e	This statement is a LIE	Female15-clip10.mp3	11	Hearing	1	Control	Female	Lie	FALSE
1397	60cc64ed080841dd23062b3e	This statement is a LIE	Female15-clip15pauses_control.mp3	13	Hearing	1	Pause	Female	Lie	FALSE
1398	60cc64ed080841dd23062b3e	This statement is a LIE	Female42-clip3.mp3	14	Hearing	1	Control	Female	Lie	FALSE
1399	60cc64ed080841dd23062b3e	This statement is a LIE	Male24-clip4pause_control.mp3	15	Hearing	1	Pause	Male	Lie	FALSE
1400	60cc64ed080841dd23062b3e	This statement is TRUE	Male36-clip7.mp3	16	Hearing	1	Control	Male	TRUE	TRUE
1401	60cc64ed080841dd23062b3e	This statement is a LIE	Female15-clip24pause_control.mp3	17	Hearing	1	Pause	Female	Lie	FALSE
1402	60cc64ed080841dd23062b3e	This statement is TRUE	Female42-clip19_3semitones_up.mp3	18	Hearing	1	Pitch	Female	TRUE	TRUE
1403	60cc64ed080841dd23062b3e	This statement is a LIE	Male36-clip15pause_control.mp3	19	Hearing	1	Pause	Male	Lie	FALSE
1404	60cc64ed080841dd23062b3e	This statement is TRUE	Female15-clip5_3semitones_up.mp3	20	Hearing	1	Pitch	Female	TRUE	TRUE
1405	60cc64ed080841dd23062b3e	This statement is a LIE	Male24-clip22pause_control.mp3	22	Hearing	1	Pause	Male	Lie	FALSE
1406	60cc64ed080841dd23062b3e	This statement is a LIE	Female15-clip12pause_control.mp3	23	Hearing	1	Pause	Female	Lie	FALSE
1407	60cc64ed080841dd23062b3e	This statement is a LIE	Female42-clip5pause_control.mp3	24	Hearing	1	Pause	Female	Lie	FALSE
1408	60cc64ed080841dd23062b3e	This statement is TRUE	Female15-clip19.mp3	26	Hearing	1	Control	Female	TRUE	TRUE
1409	60cc64ed080841dd23062b3e	This statement is TRUE	Female15-clip25.mp3	27	Hearing	1	Control	Female	TRUE	TRUE
1410	60cc64ed080841dd23062b3e	This statement is a LIE	Male36-clip9pause_control.mp3	28	Hearing	1	Pause	Male	Lie	FALSE
1411	60cc64ed080841dd23062b3e	This statement is a LIE	Male24-clip10pause_control.mp3	29	Hearing	1	Pause	Male	Lie	FALSE
1412	60cc64ed080841dd23062b3e	This statement is a LIE	Male24-clip3_3semitones_up.mp3	30	Hearing	1	Pitch	Male	Lie	FALSE
1413	60cc64ed080841dd23062b3e	This statement is TRUE	Male24-clip24_3semitones_up.mp3	31	Hearing	1	Pitch	Male	TRUE	TRUE
1414	60cc64ed080841dd23062b3e	This statement is TRUE	Female42-clip4_3semitones_up.mp3	32	Hearing	1	Pitch	Female	TRUE	TRUE
1415	60cc64ed080841dd23062b3e	This statement is a LIE	Male36-clip8_3semitones_up.mp3	33	Hearing	1	Pitch	Male	Lie	FALSE
1416	60cc64ed080841dd23062b3e	This statement is TRUE	Male36-clip22.mp3	34	Hearing	1	Control	Male	TRUE	TRUE
1417	60cc64ed080841dd23062b3e	This statement is a LIE	Male24-clip11.mp3	36	Hearing	1	Control	Male	Lie	FALSE
1418	60cc64ed080841dd23062b3e	This statement is a LIE	Female42-clip20pause_control.mp3	37	Hearing	1	Pause	Female	Lie	FALSE
1419	60cc64ed080841dd23062b3e	This statement is TRUE	Male36-clip4.mp3	38	Hearing	1	Control	Male	TRUE	TRUE
1420	60cc64ed080841dd23062b3e	This statement is TRUE	Male36-clip11_3semitones_up.mp3	39	Hearing	1	Pitch	Male	TRUE	TRUE
1421	60cc64ed080841dd23062b3e	This statement is TRUE	Female15-clip2_3semitones_up.mp3	40	Hearing	1	Pitch	Female	TRUE	TRUE
1422	60cc64ed080841dd23062b3e	This statement is TRUE	Female15-clip7.mp3	41	Hearing	1	Control	Female	TRUE	TRUE
1423	60cc64ed080841dd23062b3e	This statement is a LIE	Female15-clip22.mp3	42	Hearing	1	Control	Female	Lie	FALSE
1424	60cc64ed080841dd23062b3e	This statement is TRUE	Female42-clip15.mp3	43	Hearing	1	Control	Female	TRUE	TRUE
1425	60cc64ed080841dd23062b3e	This statement is TRUE	Female42-clip12.mp3	44	Hearing	1	Control	Female	TRUE	TRUE
1426	60cc64ed080841dd23062b3e	This statement is TRUE	Male36-clip21pause_control.mp3	45	Hearing	1	Pause	Male	TRUE	TRUE
1427	60cc64ed080841dd23062b3e	This statement is TRUE	Female15-clip6pause_control.mp3	46	Hearing	1	Pause	Female	TRUE	TRUE
1428	60cc64ed080841dd23062b3e	This statement is TRUE	Male36-clip19.mp3	47	Hearing	1	Control	Male	TRUE	TRUE
1429	60cc64ed080841dd23062b3e	This statement is a LIE	Male24-clip21_3semitones_up.mp3	48	Hearing	1	Pitch	Male	Lie	FALSE
1430	60cc64ed080841dd23062b3e	This statement is TRUE	Male24-clip5.mp3	49	Hearing	1	Control	Male	TRUE	TRUE
1431	60cc64ed080841dd23062b3e	This statement is a LIE	Male24-clip6_3semitones_up.mp3	50	Hearing	1	Pitch	Male	Lie	FALSE
1432	60cc64ed080841dd23062b3e	This statement is a LIE	Male36-clip23_3semitones_up.mp3	51	Hearing	1	Pitch	Male	Lie	FALSE
1433	60cc64ed080841dd23062b3e	This statement is TRUE	Female15-clip16.mp3	52	Hearing	1	Control	Female	TRUE	TRUE
1434	60cc64ed080841dd23062b3e	This statement is a LIE	Female15-clip21pause_control.mp3	53	Hearing	1	Pause	Female	Lie	FALSE
1435	60cc64ed080841dd23062b3e	This statement is a LIE	Male24-clip1pause_control.mp3	54	Hearing	1	Pause	Male	Lie	FALSE
1436	60cc64ed080841dd23062b3e	This statement is a LIE	Female42-clip17pause_control.mp3	55	Hearing	1	Pause	Female	Lie	FALSE
1437	60cc64ed080841dd23062b3e	This statement is a LIE	Male24-clip16pause_control.mp3	56	Hearing	1	Pause	Male	Lie	FALSE
1438	60cc64ed080841dd23062b3e	This statement is TRUE	Male24-clip9_3semitones_up.mp3	57	Hearing	1	Pitch	Male	TRUE	TRUE
1439	60cc64ed080841dd23062b3e	This statement is TRUE	Male36-clip14_3semitones_up.mp3	58	Hearing	1	Pitch	Male	TRUE	TRUE
1440	60cc64ed080841dd23062b3e	This statement is TRUE	Female42-clip24.mp3	59	Hearing	1	Control	Female	TRUE	TRUE
1441	60cc64ed080841dd23062b3e	This statement is TRUE	Female15-clip17_3semitones_up.mp3	60	Hearing	1	Pitch	Female	TRUE	TRUE
1442	60cc64ed080841dd23062b3e	This statement is a LIE	Female15-clip11_3semitones_up.mp3	61	Hearing	1	Pitch	Female	Lie	FALSE
1443	60cc64ed080841dd23062b3e	This statement is TRUE	Male24-clip17.mp3	62	Hearing	1	Control	Male	TRUE	TRUE
1444	60cc64ed080841dd23062b3e	This statement is TRUE	Male24-clip18_3semitones_up.mp3	63	Hearing	1	Pitch	Male	TRUE	TRUE
1445	60cc64ed080841dd23062b3e	This statement is a LIE	Male24-clip15_3semitones_up.mp3	64	Hearing	1	Pitch	Male	Lie	FALSE
1446	60cc64ed080841dd23062b3e	This statement is TRUE	Male24-clip2.mp3	65	Hearing	1	Control	Male	TRUE	TRUE
1447	60cc64ed080841dd23062b3e	This statement is a LIE	Male24-clip19pause_control.mp3	66	Hearing	1	Pause	Male	Lie	FALSE
1448	60cc64ed080841dd23062b3e	This statement is TRUE	Male24-clip12_3semitones_up.mp3	67	Hearing	1	Pitch	Male	TRUE	TRUE
1449	60cc64ed080841dd23062b3e	This statement is TRUE	Male24-clip20.mp3	68	Hearing	1	Control	Male	TRUE	TRUE
1450	60cc64ed080841dd23062b3e	This statement is TRUE	Female15-clip13.mp3	69	Hearing	1	Control	Female	TRUE	TRUE
1451	60cc64ed080841dd23062b3e	This statement is a LIE	Male36-clip20_3semitones_up.mp3	70	Hearing	1	Pitch	Male	Lie	FALSE
1452	60cc64ed080841dd23062b3e	This statement is TRUE	Female42-clip18.mp3	71	Hearing	1	Control	Female	TRUE	TRUE
1453	60cc64ed080841dd23062b3e	This statement is a LIE	Female15-clip18pause_control.mp3	73	Hearing	1	Pause	Female	Lie	FALSE
1454	60cc64ed080841dd23062b3e	This statement is TRUE	Female42-clip21.mp3	74	Hearing	1	Control	Female	TRUE	TRUE
1455	60cc64ed080841dd23062b3e	This statement is TRUE	Female42-clip14pause_control.mp3	75	Hearing	1	Pause	Female	TRUE	TRUE
1456	60cc64ed080841dd23062b3e	This statement is TRUE	Female42-clip23pause_control.mp3	76	Hearing	1	Pause	Female	TRUE	TRUE
1457	60cc64ed080841dd23062b3e	This statement is TRUE	Female42-clip7_3semitones_up.mp3	77	Hearing	1	Pitch	Female	TRUE	TRUE
1458	60cc64ed080841dd23062b3e	This statement is a LIE	Male36-clip16.mp3	78	Hearing	1	Control	Male	Lie	FALSE
1459	60cc64ed080841dd23062b3e	This statement is a LIE	Male36-clip6pause_control.mp3	79	Hearing	1	Pause	Male	Lie	FALSE
1460	60cc64ed080841dd23062b3e	This statement is TRUE	Female42-clip16_3semitones_up.mp3	80	Hearing	1	Pitch	Female	TRUE	TRUE
1461	60cc64ed080841dd23062b3e	This statement is TRUE	Male24-clip25pause_control.mp3	81	Hearing	1	Pause	Male	TRUE	TRUE
1462	60cc64ed080841dd23062b3e	This statement is a LIE	Female15-clip14_3semitones_up.mp3	82	Hearing	1	Pitch	Female	Lie	FALSE
1463	60cc64ed080841dd23062b3e	This statement is TRUE	Female15-clip23_3semitones_up.mp3	83	Hearing	1	Pitch	Female	TRUE	TRUE
1464	60cc64ed080841dd23062b3e	This statement is TRUE	Female42-clip2pause_control.mp3	84	Hearing	1	Pause	Female	TRUE	TRUE
1465	60cc64ed080841dd23062b3e	This statement is a LIE	Female42-clip25_3semitones_up.mp3	85	Hearing	1	Pitch	Female	Lie	FALSE
1466	60cc64ed080841dd23062b3e	This statement is a LIE	Female42-clip10_3semitones_up.mp3	86	Hearing	1	Pitch	Female	Lie	FALSE
1467	60cc64ed080841dd23062b3e	This statement is TRUE	Female15-clip8_3semitones_up.mp3	87	Hearing	1	Pitch	Female	TRUE	TRUE
1468	60cc64ed080841dd23062b3e	This statement is TRUE	Male36-clip5_3semitones_up.mp3	88	Hearing	1	Pitch	Male	TRUE	TRUE
1469	60cc64ed080841dd23062b3e	This statement is a LIE	Female15-clip9pause_control.mp3	89	Hearing	1	Pause	Female	Lie	FALSE
1470	60cc64ed080841dd23062b3e	This statement is a LIE	Male36-clip17_3semitones_up.mp3	90	Hearing	1	Pitch	Male	Lie	FALSE
1471	60cc64ed080841dd23062b3e	This statement is TRUE	Male36-clip13.mp3	91	Hearing	1	Control	Male	TRUE	TRUE
1472	60cc64ed080841dd23062b3e	This statement is TRUE	Male36-clip10.mp3	92	Hearing	1	Control	Male	TRUE	TRUE
1473	60cc64ed080841dd23062b3e	This statement is TRUE	Male36-clip2_3semitones_up.mp3	93	Hearing	1	Pitch	Male	TRUE	TRUE
1474	60cc64ed080841dd23062b3e	This statement is a LIE	Male24-clip23.mp3	94	Hearing	1	Control	Male	Lie	FALSE
1475	60cc64ed080841dd23062b3e	This statement is TRUE	Male36-clip18pause_control.mp3	95	Hearing	1	Pause	Male	TRUE	TRUE
1476	60cc64ed080841dd23062b3e	This statement is a LIE	Male24-clip7pause_control.mp3	96	Hearing	1	Pause	Male	Lie	FALSE
1477	60cc64ed080841dd23062b3e	This statement is TRUE	Female15-clip4.mp3	97	Hearing	1	Control	Female	TRUE	TRUE
1478	60cc64ed080841dd23062b3e	This statement is a LIE	Male24-clip13pause_control.mp3	98	Hearing	1	Pause	Male	Lie	FALSE
1479	60cc64ed080841dd23062b3e	This statement is a LIE	Female42-clip11pause_control.mp3	99	Hearing	1	Pause	Female	Lie	FALSE
1480	60cc64ed080841dd23062b3e	This statement is a LIE	Female15-clip20_3semitones_up.mp3	100	Hearing	1	Pitch	Female	Lie	FALSE
1481	60cc64ed080841dd23062b3e	This statement is a LIE	Male36-clip12pause_control.mp3	101	Hearing	1	Pause	Male	Lie	FALSE
1482	60cc64ed080841dd23062b3e	This statement is a LIE	Male24-clip14.mp3	102	Hearing	1	Control	Male	Lie	FALSE
1483	60cc64ed080841dd23062b3e	This statement is a LIE	Female42-clip6.mp3	103	Hearing	1	Control	Female	Lie	FALSE
1484	60cc64ed080841dd23062b3e	This statement is a LIE	Male36-clip24pause_control.mp3	104	Hearing	1	Pause	Male	Lie	FALSE
1485	60cc64ed080841dd23062b3e	This statement is a LIE	Male36-clip3pause_control.mp3	105	Hearing	1	Pause	Male	Lie	FALSE
1486	60cdf0267bd350e9af0a125b	This statement is a LIE	Female15-clip1.mp3	1	Hearing	1	Control	Female	Lie	FALSE
1487	60cdf0267bd350e9af0a125b	This statement is TRUE	Female42-clip12.mp3	2	Hearing	1	Control	Female	TRUE	TRUE
1488	60cdf0267bd350e9af0a125b	This statement is TRUE	Male24-clip8.mp3	3	Hearing	1	Control	Male	TRUE	TRUE
1489	60cdf0267bd350e9af0a125b	This statement is TRUE	Female15-clip4.mp3	4	Hearing	1	Control	Female	TRUE	TRUE
1490	60cdf0267bd350e9af0a125b	This statement is a LIE	Male24-clip13pause_control.mp3	5	Hearing	1	Pause	Male	Lie	FALSE
1491	60cdf0267bd350e9af0a125b	This statement is TRUE	Male24-clip20.mp3	6	Hearing	1	Control	Male	TRUE	TRUE
1492	60cdf0267bd350e9af0a125b	This statement is a LIE	Male36-clip21pause_control.mp3	7	Hearing	1	Pause	Male	Lie	FALSE
1493	60cdf0267bd350e9af0a125b	This statement is TRUE	Male36-clip20_3semitones_up.mp3	8	Hearing	1	Pitch	Male	TRUE	TRUE
1494	60cdf0267bd350e9af0a125b	This statement is a LIE	Female15-clip3pause_control.mp3	9	Hearing	1	Pause	Female	Lie	FALSE
1495	60cdf0267bd350e9af0a125b	This statement is TRUE	Male36-clip7.mp3	10	Hearing	1	Control	Male	TRUE	TRUE
1496	60cdf0267bd350e9af0a125b	This statement is TRUE	Female15-clip2_3semitones_up.mp3	11	Hearing	1	Pitch	Female	TRUE	TRUE
1497	60cdf0267bd350e9af0a125b	This statement is a LIE	Female42-clip1_3semitones_up.mp3	12	Hearing	1	Pitch	Female	Lie	FALSE
1498	60cdf0267bd350e9af0a125b	This statement is TRUE	Female42-clip16_3semitones_up.mp3	13	Hearing	1	Pitch	Female	TRUE	TRUE
1499	60cdf0267bd350e9af0a125b	This statement is TRUE	Female42-clip22_3semitones_up.mp3	14	Hearing	1	Pitch	Female	TRUE	TRUE
1500	60cdf0267bd350e9af0a125b	This statement is TRUE	Male36-clip17_3semitones_up.mp3	15	Hearing	1	Pitch	Male	TRUE	TRUE
1501	60cdf0267bd350e9af0a125b	This statement is a LIE	Female42-clip17pause_control.mp3	17	Hearing	1	Pause	Female	Lie	FALSE
1502	60cdf0267bd350e9af0a125b	This statement is TRUE	Female15-clip14_3semitones_up.mp3	18	Hearing	1	Pitch	Female	TRUE	TRUE
1503	60cdf0267bd350e9af0a125b	This statement is TRUE	Male24-clip16pause_control.mp3	19	Hearing	1	Pause	Male	TRUE	TRUE
1504	60cdf0267bd350e9af0a125b	This statement is TRUE	Female15-clip5_3semitones_up.mp3	20	Hearing	1	Pitch	Female	TRUE	TRUE
1505	60cdf0267bd350e9af0a125b	This statement is a LIE	Female15-clip22.mp3	21	Hearing	1	Control	Female	Lie	FALSE
1506	60cdf0267bd350e9af0a125b	This statement is TRUE	Male36-clip4.mp3	22	Hearing	1	Control	Male	TRUE	TRUE
1507	60cdf0267bd350e9af0a125b	This statement is a LIE	Female42-clip23pause_control.mp3	23	Hearing	1	Pause	Female	Lie	FALSE
1508	60cdf0267bd350e9af0a125b	This statement is TRUE	Male24-clip17.mp3	24	Hearing	1	Control	Male	TRUE	TRUE
1509	60cdf0267bd350e9af0a125b	This statement is a LIE	Female15-clip12pause_control.mp3	25	Hearing	1	Pause	Female	Lie	FALSE
1510	60cdf0267bd350e9af0a125b	This statement is TRUE	Female15-clip24pause_control.mp3	26	Hearing	1	Pause	Female	TRUE	TRUE
1511	60cdf0267bd350e9af0a125b	This statement is a LIE	Female15-clip21pause_control.mp3	27	Hearing	1	Pause	Female	Lie	FALSE
1512	60cdf0267bd350e9af0a125b	This statement is TRUE	Male24-clip9_3semitones_up.mp3	28	Hearing	1	Pitch	Male	TRUE	TRUE
1513	60cdf0267bd350e9af0a125b	This statement is a LIE	Female42-clip5pause_control.mp3	30	Hearing	1	Pause	Female	Lie	FALSE
1514	60cdf0267bd350e9af0a125b	This statement is TRUE	Male36-clip19.mp3	31	Hearing	1	Control	Male	TRUE	TRUE
1515	60cdf0267bd350e9af0a125b	This statement is TRUE	Male36-clip9pause_control.mp3	32	Hearing	1	Pause	Male	TRUE	TRUE
1516	60cdf0267bd350e9af0a125b	This statement is TRUE	Female15-clip10.mp3	33	Hearing	1	Control	Female	TRUE	TRUE
1517	60cdf0267bd350e9af0a125b	This statement is a LIE	Female15-clip17_3semitones_up.mp3	34	Hearing	1	Pitch	Female	Lie	FALSE
1518	60cdf0267bd350e9af0a125b	This statement is TRUE	Female42-clip24.mp3	35	Hearing	1	Control	Female	TRUE	TRUE
1519	60cdf0267bd350e9af0a125b	This statement is TRUE	Male36-clip15pause_control.mp3	36	Hearing	1	Pause	Male	TRUE	TRUE
1520	60cdf0267bd350e9af0a125b	This statement is TRUE	Male24-clip2.mp3	37	Hearing	1	Control	Male	TRUE	TRUE
1521	60cdf0267bd350e9af0a125b	This statement is a LIE	Female42-clip3.mp3	38	Hearing	1	Control	Female	Lie	FALSE
1522	60cdf0267bd350e9af0a125b	This statement is TRUE	Male36-clip10.mp3	40	Hearing	1	Control	Male	TRUE	TRUE
1523	60cdf0267bd350e9af0a125b	This statement is a LIE	Male24-clip5.mp3	41	Hearing	1	Control	Male	Lie	FALSE
1524	60cdf0267bd350e9af0a125b	This statement is TRUE	Female15-clip7.mp3	42	Hearing	1	Control	Female	TRUE	TRUE
1525	60cdf0267bd350e9af0a125b	This statement is TRUE	Male24-clip12_3semitones_up.mp3	43	Hearing	1	Pitch	Male	TRUE	TRUE
1526	60cdf0267bd350e9af0a125b	This statement is TRUE	Male24-clip3_3semitones_up.mp3	44	Hearing	1	Pitch	Male	TRUE	TRUE
1527	60cdf0267bd350e9af0a125b	This statement is TRUE	Male36-clip5_3semitones_up.mp3	45	Hearing	1	Pitch	Male	TRUE	TRUE
1528	60cdf0267bd350e9af0a125b	This statement is a LIE	Male24-clip22pause_control.mp3	46	Hearing	1	Pause	Male	Lie	FALSE
1529	60cdf0267bd350e9af0a125b	This statement is a LIE	Female42-clip21.mp3	47	Hearing	1	Control	Female	Lie	FALSE
1530	60cdf0267bd350e9af0a125b	This statement is a LIE	Female42-clip15.mp3	48	Hearing	1	Control	Female	Lie	FALSE
1531	60cdf0267bd350e9af0a125b	This statement is TRUE	Male36-clip16.mp3	49	Hearing	1	Control	Male	TRUE	TRUE
1532	60cdf0267bd350e9af0a125b	This statement is TRUE	Female15-clip8_3semitones_up.mp3	50	Hearing	1	Pitch	Female	TRUE	TRUE
1533	60cdf0267bd350e9af0a125b	This statement is a LIE	Female42-clip25_3semitones_up.mp3	51	Hearing	1	Pitch	Female	Lie	FALSE
1534	60cdf0267bd350e9af0a125b	This statement is TRUE	Female42-clip2pause_control.mp3	52	Hearing	1	Pause	Female	TRUE	TRUE
1535	60cdf0267bd350e9af0a125b	This statement is a LIE	Female42-clip9.mp3	53	Hearing	1	Control	Female	Lie	FALSE
1536	60cdf0267bd350e9af0a125b	This statement is TRUE	Male36-clip23_3semitones_up.mp3	54	Hearing	1	Pitch	Male	TRUE	TRUE
1537	60cdf0267bd350e9af0a125b	This statement is TRUE	Female42-clip14pause_control.mp3	55	Hearing	1	Pause	Female	TRUE	TRUE
1538	60cdf0267bd350e9af0a125b	This statement is TRUE	Female15-clip6pause_control.mp3	56	Hearing	1	Pause	Female	TRUE	TRUE
1539	60cdf0267bd350e9af0a125b	This statement is TRUE	Male24-clip19pause_control.mp3	57	Hearing	1	Pause	Male	TRUE	TRUE
1540	60cdf0267bd350e9af0a125b	This statement is TRUE	Male36-clip14_3semitones_up.mp3	58	Hearing	1	Pitch	Male	TRUE	TRUE
1541	60cdf0267bd350e9af0a125b	This statement is TRUE	Female42-clip20pause_control.mp3	59	Hearing	1	Pause	Female	TRUE	TRUE
1542	60cdf0267bd350e9af0a125b	This statement is TRUE	Male24-clip11.mp3	60	Hearing	1	Control	Male	TRUE	TRUE
1543	60cdf0267bd350e9af0a125b	This statement is TRUE	Male24-clip25pause_control.mp3	61	Hearing	1	Pause	Male	TRUE	TRUE
1544	60cdf0267bd350e9af0a125b	This statement is TRUE	Female42-clip19_3semitones_up.mp3	62	Hearing	1	Pitch	Female	TRUE	TRUE
1545	60cdf0267bd350e9af0a125b	This statement is TRUE	Male24-clip10pause_control.mp3	63	Hearing	1	Pause	Male	TRUE	TRUE
1546	60cdf0267bd350e9af0a125b	This statement is TRUE	Male24-clip15_3semitones_up.mp3	65	Hearing	1	Pitch	Male	TRUE	TRUE
1547	60cdf0267bd350e9af0a125b	This statement is TRUE	Female15-clip25.mp3	66	Hearing	1	Control	Female	TRUE	TRUE
1548	60cdf0267bd350e9af0a125b	This statement is a LIE	Male24-clip1pause_control.mp3	67	Hearing	1	Pause	Male	Lie	FALSE
1549	60cdf0267bd350e9af0a125b	This statement is TRUE	Male36-clip3pause_control.mp3	68	Hearing	1	Pause	Male	TRUE	TRUE
1550	60cdf0267bd350e9af0a125b	This statement is a LIE	Female15-clip19.mp3	69	Hearing	1	Control	Female	Lie	FALSE
1551	60cdf0267bd350e9af0a125b	This statement is TRUE	Male36-clip18pause_control.mp3	70	Hearing	1	Pause	Male	TRUE	TRUE
1552	60cdf0267bd350e9af0a125b	This statement is a LIE	Male36-clip22.mp3	71	Hearing	1	Control	Male	Lie	FALSE
1553	60cdf0267bd350e9af0a125b	This statement is TRUE	Female15-clip9pause_control.mp3	72	Hearing	1	Pause	Female	TRUE	TRUE
1554	60cdf0267bd350e9af0a125b	This statement is TRUE	Female15-clip20_3semitones_up.mp3	73	Hearing	1	Pitch	Female	TRUE	TRUE
1555	60cdf0267bd350e9af0a125b	This statement is a LIE	Male24-clip18_3semitones_up.mp3	74	Hearing	1	Pitch	Male	Lie	FALSE
1556	60cdf0267bd350e9af0a125b	This statement is TRUE	Female42-clip18.mp3	75	Hearing	1	Control	Female	TRUE	TRUE
1557	60cdf0267bd350e9af0a125b	This statement is a LIE	Female42-clip10_3semitones_up.mp3	76	Hearing	1	Pitch	Female	Lie	FALSE
1558	60cdf0267bd350e9af0a125b	This statement is a LIE	Female42-clip8pause_control.mp3	77	Hearing	1	Pause	Female	Lie	FALSE
1559	60cdf0267bd350e9af0a125b	This statement is a LIE	Male24-clip21_3semitones_up.mp3	78	Hearing	1	Pitch	Male	Lie	FALSE
1560	60cdf0267bd350e9af0a125b	This statement is a LIE	Female15-clip18pause_control.mp3	79	Hearing	1	Pause	Female	Lie	FALSE
1561	60cdf0267bd350e9af0a125b	This statement is TRUE	Male24-clip7pause_control.mp3	80	Hearing	1	Pause	Male	TRUE	TRUE
1562	60cdf0267bd350e9af0a125b	This statement is TRUE	Male36-clip24pause_control.mp3	81	Hearing	1	Pause	Male	TRUE	TRUE
1563	60cdf0267bd350e9af0a125b	This statement is TRUE	Male36-clip11_3semitones_up.mp3	82	Hearing	1	Pitch	Male	TRUE	TRUE
1564	60cdf0267bd350e9af0a125b	This statement is TRUE	Male36-clip12pause_control.mp3	83	Hearing	1	Pause	Male	TRUE	TRUE
1565	60cdf0267bd350e9af0a125b	This statement is TRUE	Male24-clip24_3semitones_up.mp3	84	Hearing	1	Pitch	Male	TRUE	TRUE
1566	60cdf0267bd350e9af0a125b	This statement is TRUE	Female42-clip6.mp3	85	Hearing	1	Control	Female	TRUE	TRUE
1567	60cdf0267bd350e9af0a125b	This statement is TRUE	Female42-clip11pause_control.mp3	86	Hearing	1	Pause	Female	TRUE	TRUE
1568	60cdf0267bd350e9af0a125b	This statement is a LIE	Female15-clip23_3semitones_up.mp3	87	Hearing	1	Pitch	Female	Lie	FALSE
1569	60cdf0267bd350e9af0a125b	This statement is TRUE	Male24-clip23.mp3	88	Hearing	1	Control	Male	TRUE	TRUE
1570	60cdf0267bd350e9af0a125b	This statement is TRUE	Female15-clip11_3semitones_up.mp3	89	Hearing	1	Pitch	Female	TRUE	TRUE
1571	60cdf0267bd350e9af0a125b	This statement is TRUE	Male36-clip2_3semitones_up.mp3	90	Hearing	1	Pitch	Male	TRUE	TRUE
1572	60cdf0267bd350e9af0a125b	This statement is TRUE	Female42-clip4_3semitones_up.mp3	91	Hearing	1	Pitch	Female	TRUE	TRUE
1573	60cdf0267bd350e9af0a125b	This statement is TRUE	Male24-clip4pause_control.mp3	92	Hearing	1	Pause	Male	TRUE	TRUE
1574	60cdf0267bd350e9af0a125b	This statement is TRUE	Male36-clip8_3semitones_up.mp3	93	Hearing	1	Pitch	Male	TRUE	TRUE
1575	60cdf0267bd350e9af0a125b	This statement is TRUE	Female15-clip13.mp3	94	Hearing	1	Control	Female	TRUE	TRUE
1576	60cdf0267bd350e9af0a125b	This statement is a LIE	Female42-clip13_3semitones_up.mp3	95	Hearing	1	Pitch	Female	Lie	FALSE
1577	60cdf0267bd350e9af0a125b	This statement is a LIE	Male36-clip6pause_control.mp3	96	Hearing	1	Pause	Male	Lie	FALSE
1578	60cdf0267bd350e9af0a125b	This statement is a LIE	Female15-clip15pauses_control.mp3	97	Hearing	1	Pause	Female	Lie	FALSE
1579	60cdf0267bd350e9af0a125b	This statement is TRUE	Male36-clip1.mp3	98	Hearing	1	Control	Male	TRUE	TRUE
1580	60cdf0267bd350e9af0a125b	This statement is TRUE	Female42-clip7_3semitones_up.mp3	99	Hearing	1	Pitch	Female	TRUE	TRUE
1581	60cdf0267bd350e9af0a125b	This statement is a LIE	Male24-clip14.mp3	100	Hearing	1	Control	Male	Lie	FALSE
1582	60cdf0267bd350e9af0a125b	This statement is TRUE	Male36-clip13.mp3	101	Hearing	1	Control	Male	TRUE	TRUE
1583	60cdf0267bd350e9af0a125b	This statement is TRUE	Female15-clip16.mp3	102	Hearing	1	Control	Female	TRUE	TRUE
1584	60cdf0267bd350e9af0a125b	This statement is TRUE	Male24-clip6_3semitones_up.mp3	103	Hearing	1	Pitch	Male	TRUE	TRUE
1585	60cf482f091f03a55c735bb8	This statement is a LIE	Female15-clip1.mp3	1	Hearing	1	Control	Female	Lie	FALSE
1586	60cf482f091f03a55c735bb8	This statement is TRUE	Male24-clip14.mp3	2	Hearing	1	Control	Male	TRUE	TRUE
1587	60cf482f091f03a55c735bb8	This statement is TRUE	Male36-clip5_3semitones_up.mp3	3	Hearing	1	Pitch	Male	TRUE	TRUE
1588	60cf482f091f03a55c735bb8	This statement is TRUE	Male24-clip16pause_control.mp3	4	Hearing	1	Pause	Male	TRUE	TRUE
1589	60cf482f091f03a55c735bb8	This statement is a LIE	Female42-clip23pause_control.mp3	5	Hearing	1	Pause	Female	Lie	FALSE
1590	60cf482f091f03a55c735bb8	This statement is TRUE	Female42-clip24.mp3	6	Hearing	1	Control	Female	TRUE	TRUE
1591	60cf482f091f03a55c735bb8	This statement is TRUE	Female15-clip23_3semitones_up.mp3	7	Hearing	1	Pitch	Female	TRUE	TRUE
1592	60cf482f091f03a55c735bb8	This statement is a LIE	Female42-clip2pause_control.mp3	8	Hearing	1	Pause	Female	Lie	FALSE
1593	60cf482f091f03a55c735bb8	This statement is TRUE	Female42-clip9.mp3	9	Hearing	1	Control	Female	TRUE	TRUE
1594	60cf482f091f03a55c735bb8	This statement is a LIE	Female15-clip21pause_control.mp3	10	Hearing	1	Pause	Female	Lie	FALSE
1595	60cf482f091f03a55c735bb8	This statement is a LIE	Female42-clip3.mp3	11	Hearing	1	Control	Female	Lie	FALSE
1596	60cf482f091f03a55c735bb8	This statement is TRUE	Female42-clip15.mp3	12	Hearing	1	Control	Female	TRUE	TRUE
1597	60cf482f091f03a55c735bb8	This statement is a LIE	Female15-clip12pause_control.mp3	13	Hearing	1	Pause	Female	Lie	FALSE
1598	60cf482f091f03a55c735bb8	This statement is a LIE	Female15-clip25.mp3	14	Hearing	1	Control	Female	Lie	FALSE
1599	60cf482f091f03a55c735bb8	This statement is TRUE	Male36-clip23_3semitones_up.mp3	15	Hearing	1	Pitch	Male	TRUE	TRUE
1600	60cf482f091f03a55c735bb8	This statement is TRUE	Male24-clip6_3semitones_up.mp3	16	Hearing	1	Pitch	Male	TRUE	TRUE
1601	60cf482f091f03a55c735bb8	This statement is TRUE	Female42-clip18.mp3	17	Hearing	1	Control	Female	TRUE	TRUE
1602	60cf482f091f03a55c735bb8	This statement is TRUE	Female15-clip10.mp3	18	Hearing	1	Control	Female	TRUE	TRUE
1603	60cf482f091f03a55c735bb8	This statement is TRUE	Male24-clip19pause_control.mp3	19	Hearing	1	Pause	Male	TRUE	TRUE
1604	60cf482f091f03a55c735bb8	This statement is TRUE	Male36-clip13.mp3	20	Hearing	1	Control	Male	TRUE	TRUE
1605	60cf482f091f03a55c735bb8	This statement is TRUE	Male24-clip11.mp3	21	Hearing	1	Control	Male	TRUE	TRUE
1606	60cf482f091f03a55c735bb8	This statement is a LIE	Female15-clip9pause_control.mp3	22	Hearing	1	Pause	Female	Lie	FALSE
1607	60cf482f091f03a55c735bb8	This statement is TRUE	Male36-clip19.mp3	23	Hearing	1	Control	Male	TRUE	TRUE
1608	60cf482f091f03a55c735bb8	This statement is TRUE	Male24-clip2.mp3	24	Hearing	1	Control	Male	TRUE	TRUE
1609	60cf482f091f03a55c735bb8	This statement is a LIE	Female15-clip24pause_control.mp3	25	Hearing	1	Pause	Female	Lie	FALSE
1610	60cf482f091f03a55c735bb8	This statement is a LIE	Male24-clip22pause_control.mp3	26	Hearing	1	Pause	Male	Lie	FALSE
1611	60cf482f091f03a55c735bb8	This statement is TRUE	Male24-clip21_3semitones_up.mp3	27	Hearing	1	Pitch	Male	TRUE	TRUE
1612	60cf482f091f03a55c735bb8	This statement is TRUE	Female42-clip19_3semitones_up.mp3	28	Hearing	1	Pitch	Female	TRUE	TRUE
1613	60cf482f091f03a55c735bb8	This statement is TRUE	Male36-clip17_3semitones_up.mp3	30	Hearing	1	Pitch	Male	TRUE	TRUE
1614	60cf482f091f03a55c735bb8	This statement is TRUE	Female15-clip4.mp3	31	Hearing	1	Control	Female	TRUE	TRUE
1615	60cf482f091f03a55c735bb8	This statement is TRUE	Female42-clip6.mp3	32	Hearing	1	Control	Female	TRUE	TRUE
1616	60cf482f091f03a55c735bb8	This statement is a LIE	Male24-clip24_3semitones_up.mp3	33	Hearing	1	Pitch	Male	Lie	FALSE
1617	60cf482f091f03a55c735bb8	This statement is TRUE	Female42-clip7_3semitones_up.mp3	35	Hearing	1	Pitch	Female	TRUE	TRUE
1618	60cf482f091f03a55c735bb8	This statement is a LIE	Male36-clip24pause_control.mp3	36	Hearing	1	Pause	Male	Lie	FALSE
1619	60cf482f091f03a55c735bb8	This statement is TRUE	Female42-clip17pause_control.mp3	37	Hearing	1	Pause	Female	TRUE	TRUE
1620	60cf482f091f03a55c735bb8	This statement is TRUE	Female15-clip5_3semitones_up.mp3	38	Hearing	1	Pitch	Female	TRUE	TRUE
1621	60cf482f091f03a55c735bb8	This statement is TRUE	Female42-clip25_3semitones_up.mp3	39	Hearing	1	Pitch	Female	TRUE	TRUE
1622	60cf482f091f03a55c735bb8	This statement is TRUE	Female15-clip18pause_control.mp3	40	Hearing	1	Pause	Female	TRUE	TRUE
1623	60cf482f091f03a55c735bb8	This statement is a LIE	Male24-clip18_3semitones_up.mp3	42	Hearing	1	Pitch	Male	Lie	FALSE
1624	60cf482f091f03a55c735bb8	This statement is TRUE	Female15-clip13.mp3	43	Hearing	1	Control	Female	TRUE	TRUE
1625	60cf482f091f03a55c735bb8	This statement is a LIE	Male36-clip21pause_control.mp3	44	Hearing	1	Pause	Male	Lie	FALSE
1626	60cf482f091f03a55c735bb8	This statement is TRUE	Male36-clip11_3semitones_up.mp3	45	Hearing	1	Pitch	Male	TRUE	TRUE
1627	60cf482f091f03a55c735bb8	This statement is TRUE	Female42-clip4_3semitones_up.mp3	46	Hearing	1	Pitch	Female	TRUE	TRUE
1628	60cf482f091f03a55c735bb8	This statement is TRUE	Female15-clip17_3semitones_up.mp3	47	Hearing	1	Pitch	Female	TRUE	TRUE
1629	60cf482f091f03a55c735bb8	This statement is TRUE	Male36-clip18pause_control.mp3	48	Hearing	1	Pause	Male	TRUE	TRUE
1630	60cf482f091f03a55c735bb8	This statement is TRUE	Female15-clip11_3semitones_up.mp3	49	Hearing	1	Pitch	Female	TRUE	TRUE
1631	60cf482f091f03a55c735bb8	This statement is TRUE	Male36-clip22.mp3	50	Hearing	1	Control	Male	TRUE	TRUE
1632	60cf482f091f03a55c735bb8	This statement is a LIE	Male36-clip12pause_control.mp3	51	Hearing	1	Pause	Male	Lie	FALSE
1633	60cf482f091f03a55c735bb8	This statement is TRUE	Female42-clip10_3semitones_up.mp3	52	Hearing	1	Pitch	Female	TRUE	TRUE
1634	60cf482f091f03a55c735bb8	This statement is TRUE	Female15-clip6pause_control.mp3	53	Hearing	1	Pause	Female	TRUE	TRUE
1635	60cf482f091f03a55c735bb8	This statement is TRUE	Male36-clip4.mp3	54	Hearing	1	Control	Male	TRUE	TRUE
1636	60cf482f091f03a55c735bb8	This statement is TRUE	Male36-clip16.mp3	55	Hearing	1	Control	Male	TRUE	TRUE
1637	60cf482f091f03a55c735bb8	This statement is TRUE	Female42-clip16_3semitones_up.mp3	56	Hearing	1	Pitch	Female	TRUE	TRUE
1638	60cf482f091f03a55c735bb8	This statement is TRUE	Male24-clip9_3semitones_up.mp3	57	Hearing	1	Pitch	Male	TRUE	TRUE
1639	60cf482f091f03a55c735bb8	This statement is a LIE	Male24-clip15_3semitones_up.mp3	59	Hearing	1	Pitch	Male	Lie	FALSE
1640	60cf482f091f03a55c735bb8	This statement is TRUE	Female15-clip8_3semitones_up.mp3	60	Hearing	1	Pitch	Female	TRUE	TRUE
1641	60cf482f091f03a55c735bb8	This statement is TRUE	Female42-clip21.mp3	61	Hearing	1	Control	Female	TRUE	TRUE
1642	60cf482f091f03a55c735bb8	This statement is TRUE	Male36-clip14_3semitones_up.mp3	62	Hearing	1	Pitch	Male	TRUE	TRUE
1643	60cf482f091f03a55c735bb8	This statement is a LIE	Male24-clip13pause_control.mp3	63	Hearing	1	Pause	Male	Lie	FALSE
1644	60cf482f091f03a55c735bb8	This statement is a LIE	Female15-clip3pause_control.mp3	64	Hearing	1	Pause	Female	Lie	FALSE
1645	60cf482f091f03a55c735bb8	This statement is TRUE	Female15-clip2_3semitones_up.mp3	65	Hearing	1	Pitch	Female	TRUE	TRUE
1646	60cf482f091f03a55c735bb8	This statement is a LIE	Female42-clip8pause_control.mp3	66	Hearing	1	Pause	Female	Lie	FALSE
1647	60cf482f091f03a55c735bb8	This statement is TRUE	Male36-clip7.mp3	67	Hearing	1	Control	Male	TRUE	TRUE
1648	60cf482f091f03a55c735bb8	This statement is a LIE	Female42-clip1_3semitones_up.mp3	68	Hearing	1	Pitch	Female	Lie	FALSE
1649	60cf482f091f03a55c735bb8	This statement is a LIE	Female42-clip13_3semitones_up.mp3	69	Hearing	1	Pitch	Female	Lie	FALSE
1650	60cf482f091f03a55c735bb8	This statement is TRUE	Female15-clip14_3semitones_up.mp3	70	Hearing	1	Pitch	Female	TRUE	TRUE
1651	60cf482f091f03a55c735bb8	This statement is TRUE	Female42-clip12.mp3	71	Hearing	1	Control	Female	TRUE	TRUE
1652	60cf482f091f03a55c735bb8	This statement is a LIE	Male36-clip10.mp3	72	Hearing	1	Control	Male	Lie	FALSE
1653	60cf482f091f03a55c735bb8	This statement is TRUE	Female42-clip14pause_control.mp3	73	Hearing	1	Pause	Female	TRUE	TRUE
1654	60cf482f091f03a55c735bb8	This statement is TRUE	Male36-clip8_3semitones_up.mp3	74	Hearing	1	Pitch	Male	TRUE	TRUE
1655	60cf482f091f03a55c735bb8	This statement is TRUE	Male36-clip6pause_control.mp3	75	Hearing	1	Pause	Male	TRUE	TRUE
1656	60cf482f091f03a55c735bb8	This statement is TRUE	Female42-clip22_3semitones_up.mp3	76	Hearing	1	Pitch	Female	TRUE	TRUE
1657	60cf482f091f03a55c735bb8	This statement is TRUE	Female15-clip20_3semitones_up.mp3	77	Hearing	1	Pitch	Female	TRUE	TRUE
1658	60cf482f091f03a55c735bb8	This statement is TRUE	Female15-clip19.mp3	78	Hearing	1	Control	Female	TRUE	TRUE
1659	60cf482f091f03a55c735bb8	This statement is a LIE	Male24-clip4pause_control.mp3	79	Hearing	1	Pause	Male	Lie	FALSE
1660	60cf482f091f03a55c735bb8	This statement is TRUE	Female15-clip22.mp3	81	Hearing	1	Control	Female	TRUE	TRUE
1661	60cf482f091f03a55c735bb8	This statement is TRUE	Female42-clip5pause_control.mp3	82	Hearing	1	Pause	Female	TRUE	TRUE
1662	60cf482f091f03a55c735bb8	This statement is TRUE	Male24-clip1pause_control.mp3	83	Hearing	1	Pause	Male	TRUE	TRUE
1663	60cf482f091f03a55c735bb8	This statement is TRUE	Male36-clip3pause_control.mp3	84	Hearing	1	Pause	Male	TRUE	TRUE
1664	60cf482f091f03a55c735bb8	This statement is a LIE	Male24-clip12_3semitones_up.mp3	85	Hearing	1	Pitch	Male	Lie	FALSE
1665	60cf482f091f03a55c735bb8	This statement is TRUE	Male36-clip2_3semitones_up.mp3	86	Hearing	1	Pitch	Male	TRUE	TRUE
1666	60cf482f091f03a55c735bb8	This statement is TRUE	Male24-clip3_3semitones_up.mp3	87	Hearing	1	Pitch	Male	TRUE	TRUE
1667	60cf482f091f03a55c735bb8	This statement is TRUE	Male36-clip15pause_control.mp3	88	Hearing	1	Pause	Male	TRUE	TRUE
1668	60cf482f091f03a55c735bb8	This statement is TRUE	Male24-clip10pause_control.mp3	89	Hearing	1	Pause	Male	TRUE	TRUE
1669	60cf482f091f03a55c735bb8	This statement is TRUE	Male24-clip23.mp3	90	Hearing	1	Control	Male	TRUE	TRUE
1670	60cf482f091f03a55c735bb8	This statement is a LIE	Male24-clip7pause_control.mp3	91	Hearing	1	Pause	Male	Lie	FALSE
1671	60cf482f091f03a55c735bb8	This statement is TRUE	Male24-clip17.mp3	92	Hearing	1	Control	Male	TRUE	TRUE
1672	60cf482f091f03a55c735bb8	This statement is TRUE	Female42-clip20pause_control.mp3	93	Hearing	1	Pause	Female	TRUE	TRUE
1673	60cf482f091f03a55c735bb8	This statement is a LIE	Female15-clip15pauses_control.mp3	94	Hearing	1	Pause	Female	Lie	FALSE
1674	60cf482f091f03a55c735bb8	This statement is TRUE	Male36-clip1.mp3	95	Hearing	1	Control	Male	TRUE	TRUE
1675	60cf482f091f03a55c735bb8	This statement is TRUE	Male36-clip9pause_control.mp3	96	Hearing	1	Pause	Male	TRUE	TRUE
1676	60cf482f091f03a55c735bb8	This statement is TRUE	Female15-clip16.mp3	97	Hearing	1	Control	Female	TRUE	TRUE
1677	60cf482f091f03a55c735bb8	This statement is TRUE	Female15-clip7.mp3	98	Hearing	1	Control	Female	TRUE	TRUE
1678	60cf482f091f03a55c735bb8	This statement is a LIE	Male24-clip5.mp3	99	Hearing	1	Control	Male	Lie	FALSE
1679	60cf482f091f03a55c735bb8	This statement is a LIE	Male24-clip20.mp3	100	Hearing	1	Control	Male	Lie	FALSE
1680	60cf482f091f03a55c735bb8	This statement is a LIE	Male24-clip8.mp3	101	Hearing	1	Control	Male	Lie	FALSE
1681	60cf482f091f03a55c735bb8	This statement is TRUE	Female42-clip11pause_control.mp3	103	Hearing	1	Pause	Female	TRUE	TRUE
1682	60cf482f091f03a55c735bb8	This statement is TRUE	Male36-clip20_3semitones_up.mp3	104	Hearing	1	Pitch	Male	TRUE	TRUE
1683	60cf482f091f03a55c735bb8	This statement is a LIE	Male24-clip25pause_control.mp3	105	Hearing	1	Pause	Male	Lie	FALSE
1684	60c221f2990ce3ca5d7f5648	This statement is TRUE	Female15-clip1pause_control.mp3	1	Hearing	2	Pause	Female	TRUE	TRUE
1685	60c221f2990ce3ca5d7f5648	This statement is TRUE	Female15-clip17.mp3	3	Hearing	2	Control	Female	TRUE	TRUE
1686	60c221f2990ce3ca5d7f5648	This statement is TRUE	Female42-clip11_3semitones_up.mp3	4	Hearing	2	Pitch	Female	TRUE	TRUE
1687	60c221f2990ce3ca5d7f5648	This statement is a LIE	Female42-clip13.mp3	5	Hearing	2	Control	Female	Lie	FALSE
1688	60c221f2990ce3ca5d7f5648	This statement is TRUE	Male36-clip8.mp3	6	Hearing	2	Control	Male	TRUE	TRUE
1689	60c221f2990ce3ca5d7f5648	This statement is TRUE	Male24-clip11pause_control.mp3	7	Hearing	2	Pause	Male	TRUE	TRUE
1690	60c221f2990ce3ca5d7f5648	This statement is TRUE	Male36-clip20.mp3	8	Hearing	2	Control	Male	TRUE	TRUE
1691	60c221f2990ce3ca5d7f5648	This statement is TRUE	Female15-clip4pause_control.mp3	9	Hearing	2	Pause	Female	TRUE	TRUE
1692	60c221f2990ce3ca5d7f5648	This statement is a LIE	Male24-clip5pause_control.mp3	11	Hearing	2	Pause	Male	Lie	FALSE
1693	60c221f2990ce3ca5d7f5648	This statement is a LIE	Female15-clip15_3semitones_up.mp3	12	Hearing	2	Pitch	Female	Lie	FALSE
1694	60c221f2990ce3ca5d7f5648	This statement is a LIE	Female15-clip10pause_control.mp3	13	Hearing	2	Pause	Female	Lie	FALSE
1695	60c221f2990ce3ca5d7f5648	This statement is TRUE	Female15-clip5.mp3	16	Hearing	2	Control	Female	TRUE	TRUE
1696	60c221f2990ce3ca5d7f5648	This statement is TRUE	Female42-clip4.mp3	17	Hearing	2	Control	Female	TRUE	TRUE
1697	60c221f2990ce3ca5d7f5648	This statement is TRUE	Male36-clip3_3semitones_up.mp3	18	Hearing	2	Pitch	Male	TRUE	TRUE
1698	60c221f2990ce3ca5d7f5648	This statement is TRUE	Male36-clip11.mp3	19	Hearing	2	Control	Male	TRUE	TRUE
1699	60c221f2990ce3ca5d7f5648	This statement is a LIE	Male36-clip14.mp3	20	Hearing	2	Control	Male	Lie	FALSE
1700	60c221f2990ce3ca5d7f5648	This statement is a LIE	Male24-clip19_3semitones_up.mp3	21	Hearing	2	Pitch	Male	Lie	FALSE
1701	60c221f2990ce3ca5d7f5648	This statement is a LIE	Female42-clip9pause_control.mp3	22	Hearing	2	Pause	Female	Lie	FALSE
1702	60c221f2990ce3ca5d7f5648	This statement is a LIE	Female15-clip23.mp3	23	Hearing	2	Control	Female	Lie	FALSE
1703	60c221f2990ce3ca5d7f5648	This statement is a LIE	Female42-clip15pause_control.mp3	24	Hearing	2	Pause	Female	Lie	FALSE
1704	60c221f2990ce3ca5d7f5648	This statement is TRUE	Male36-clip23.mp3	25	Hearing	2	Control	Male	TRUE	TRUE
1705	60c221f2990ce3ca5d7f5648	This statement is TRUE	Male24-clip10_3semitones_up.mp3	26	Hearing	2	Pitch	Male	TRUE	TRUE
1706	60c221f2990ce3ca5d7f5648	This statement is TRUE	Female15-clip21_3semitones_up.mp3	27	Hearing	2	Pitch	Female	TRUE	TRUE
1707	60c221f2990ce3ca5d7f5648	This statement is a LIE	Male36-clip2.mp3	28	Hearing	2	Control	Male	Lie	FALSE
1708	60c221f2990ce3ca5d7f5648	This statement is TRUE	Male24-clip12.mp3	29	Hearing	2	Control	Male	TRUE	TRUE
1709	60c221f2990ce3ca5d7f5648	This statement is a LIE	Female42-clip6pause_control.mp3	30	Hearing	2	Pause	Female	Lie	FALSE
1710	60c221f2990ce3ca5d7f5648	This statement is TRUE	Male36-clip6_3semitones_up.mp3	31	Hearing	2	Pitch	Male	TRUE	TRUE
1711	60c221f2990ce3ca5d7f5648	This statement is a LIE	Male36-clip1pause_control.mp3	32	Hearing	2	Pause	Male	Lie	FALSE
1712	60c221f2990ce3ca5d7f5648	This statement is a LIE	Male24-clip3.mp3	33	Hearing	2	Control	Male	Lie	FALSE
1713	60c221f2990ce3ca5d7f5648	This statement is TRUE	Male36-clip10pause_control.mp3	34	Hearing	2	Pause	Male	TRUE	TRUE
1714	60c221f2990ce3ca5d7f5648	This statement is a LIE	Female15-clip12_3semitones_up.mp3	35	Hearing	2	Pitch	Female	Lie	FALSE
1715	60c221f2990ce3ca5d7f5648	This statement is TRUE	Male36-clip16pause_control.mp3	36	Hearing	2	Pause	Male	TRUE	TRUE
1716	60c221f2990ce3ca5d7f5648	This statement is TRUE	Female42-clip23_3semitones_up.mp3	37	Hearing	2	Pitch	Female	TRUE	TRUE
1717	60c221f2990ce3ca5d7f5648	This statement is a LIE	Female42-clip1.mp3	38	Hearing	2	Control	Female	Lie	FALSE
1718	60c221f2990ce3ca5d7f5648	This statement is a LIE	Female42-clip21pause_control.mp3	39	Hearing	2	Pause	Female	Lie	FALSE
1719	60c221f2990ce3ca5d7f5648	This statement is a LIE	Female15-clip2.mp3	40	Hearing	2	Control	Female	Lie	FALSE
1720	60c221f2990ce3ca5d7f5648	This statement is TRUE	Female42-clip16.mp3	41	Hearing	2	Control	Female	TRUE	TRUE
1721	60c221f2990ce3ca5d7f5648	This statement is TRUE	Male36-clip17.mp3	42	Hearing	2	Control	Male	TRUE	TRUE
1722	60c221f2990ce3ca5d7f5648	This statement is a LIE	Female15-clip7pause_control.mp3	43	Hearing	2	Pause	Female	Lie	FALSE
1723	60c221f2990ce3ca5d7f5648	This statement is TRUE	Female15-clip24_3semitones_up.mp3	44	Hearing	2	Pitch	Female	TRUE	TRUE
1724	60c221f2990ce3ca5d7f5648	This statement is a LIE	Female15-clip6_3semitones_up.mp3	45	Hearing	2	Pitch	Female	Lie	FALSE
1725	60c221f2990ce3ca5d7f5648	This statement is TRUE	Male24-clip7_3semitones_up.mp3	46	Hearing	2	Pitch	Male	TRUE	TRUE
1726	60c221f2990ce3ca5d7f5648	This statement is a LIE	Male36-clip7pause_control.mp3	47	Hearing	2	Pause	Male	Lie	FALSE
1727	60c221f2990ce3ca5d7f5648	This statement is a LIE	Female42-clip7.mp3	48	Hearing	2	Control	Female	Lie	FALSE
1728	60c221f2990ce3ca5d7f5648	This statement is TRUE	Male24-clip16_3semitones_up.mp3	49	Hearing	2	Pitch	Male	TRUE	TRUE
1729	60c221f2990ce3ca5d7f5648	This statement is a LIE	Female42-clip24pause_control.mp3	50	Hearing	2	Pause	Female	Lie	FALSE
1730	60c221f2990ce3ca5d7f5648	This statement is a LIE	Female15-clip22pause_control.mp3	51	Hearing	2	Pause	Female	Lie	FALSE
1731	60c221f2990ce3ca5d7f5648	This statement is a LIE	Male24-clip22_3semitones_up.mp3	52	Hearing	2	Pitch	Male	Lie	FALSE
1732	60c221f2990ce3ca5d7f5648	This statement is a LIE	Male36-clip12_3semitones_up.mp3	53	Hearing	2	Pitch	Male	Lie	FALSE
1733	60c221f2990ce3ca5d7f5648	This statement is TRUE	Male36-clip18_3semitones_up.mp3	54	Hearing	2	Pitch	Male	TRUE	TRUE
1734	60c221f2990ce3ca5d7f5648	This statement is a LIE	Female42-clip8_3semitones_up.mp3	55	Hearing	2	Pitch	Female	Lie	FALSE
1735	60c221f2990ce3ca5d7f5648	This statement is a LIE	Male24-clip2pause_control.mp3	56	Hearing	2	Pause	Male	Lie	FALSE
1736	60c221f2990ce3ca5d7f5648	This statement is a LIE	Female42-clip18pause_control.mp3	57	Hearing	2	Pause	Female	Lie	FALSE
1737	60c221f2990ce3ca5d7f5648	This statement is a LIE	Female42-clip20_3semitones_up.mp3	58	Hearing	2	Pitch	Female	Lie	FALSE
1738	60c221f2990ce3ca5d7f5648	This statement is a LIE	Female42-clip12pause_control.mp3	59	Hearing	2	Pause	Female	Lie	FALSE
1739	60c221f2990ce3ca5d7f5648	This statement is a LIE	Female42-clip10.mp3	60	Hearing	2	Control	Female	Lie	FALSE
1740	60c221f2990ce3ca5d7f5648	This statement is a LIE	Male24-clip24.mp3	61	Hearing	2	Control	Male	Lie	FALSE
1741	60c221f2990ce3ca5d7f5648	This statement is a LIE	Male36-clip21_3semitones_up.mp3	62	Hearing	2	Pitch	Male	Lie	FALSE
1742	60c221f2990ce3ca5d7f5648	This statement is a LIE	Male24-clip6.mp3	63	Hearing	2	Control	Male	Lie	FALSE
1743	60c221f2990ce3ca5d7f5648	This statement is a LIE	Male36-clip22pause_control.mp3	64	Hearing	2	Pause	Male	Lie	FALSE
1744	60c221f2990ce3ca5d7f5648	This statement is a LIE	Female15-clip8.mp3	65	Hearing	2	Control	Female	Lie	FALSE
1745	60c221f2990ce3ca5d7f5648	This statement is TRUE	Male36-clip4pause_control.mp3	66	Hearing	2	Pause	Male	TRUE	TRUE
1746	60c221f2990ce3ca5d7f5648	This statement is TRUE	Male24-clip14pause_control.mp3	67	Hearing	2	Pause	Male	TRUE	TRUE
1747	60c221f2990ce3ca5d7f5648	This statement is a LIE	Female42-clip25.mp3	68	Hearing	2	Control	Female	Lie	FALSE
1748	60c221f2990ce3ca5d7f5648	This statement is a LIE	Female15-clip25pause_control.mp3	69	Hearing	2	Pause	Female	Lie	FALSE
1749	60c221f2990ce3ca5d7f5648	This statement is a LIE	Female42-clip3pause_control.mp3	70	Hearing	2	Pause	Female	Lie	FALSE
1750	60c221f2990ce3ca5d7f5648	This statement is TRUE	Female15-clip9_3semitones_up.mp3	71	Hearing	2	Pitch	Female	TRUE	TRUE
1751	60c221f2990ce3ca5d7f5648	This statement is a LIE	Male24-clip21.mp3	72	Hearing	2	Control	Male	Lie	FALSE
1752	60c221f2990ce3ca5d7f5648	This statement is TRUE	Female42-clip14_3semitones_up.mp3	73	Hearing	2	Pitch	Female	TRUE	TRUE
1753	60c221f2990ce3ca5d7f5648	This statement is TRUE	Female15-clip11.mp3	74	Hearing	2	Control	Female	TRUE	TRUE
1754	60c221f2990ce3ca5d7f5648	This statement is a LIE	Female15-clip19pause_control.mp3	75	Hearing	2	Pause	Female	Lie	FALSE
1755	60c221f2990ce3ca5d7f5648	This statement is a LIE	Male36-clip19pause_control.mp3	76	Hearing	2	Pause	Male	Lie	FALSE
1756	60c221f2990ce3ca5d7f5648	This statement is a LIE	Female15-clip20.mp3	77	Hearing	2	Control	Female	Lie	FALSE
1757	60c221f2990ce3ca5d7f5648	This statement is a LIE	Male24-clip23pause_control.mp3	78	Hearing	2	Pause	Male	Lie	FALSE
1758	60c221f2990ce3ca5d7f5648	This statement is a LIE	Male36-clip13pause_control.mp3	79	Hearing	2	Pause	Male	Lie	FALSE
1759	60c221f2990ce3ca5d7f5648	This statement is TRUE	Female15-clip13pause_control.mp3	80	Hearing	2	Pause	Female	TRUE	TRUE
1760	60c221f2990ce3ca5d7f5648	This statement is TRUE	Male24-clip1_3semitones_up.mp3	81	Hearing	2	Pitch	Male	TRUE	TRUE
1761	60c221f2990ce3ca5d7f5648	This statement is a LIE	Male36-clip9_3semitones_up.mp3	83	Hearing	2	Pitch	Male	Lie	FALSE
1762	60c221f2990ce3ca5d7f5648	This statement is a LIE	Male36-clip5.mp3	84	Hearing	2	Control	Male	Lie	FALSE
1763	60c221f2990ce3ca5d7f5648	This statement is a LIE	Male24-clip18.mp3	85	Hearing	2	Control	Male	Lie	FALSE
1764	60c221f2990ce3ca5d7f5648	This statement is TRUE	Female42-clip19.mp3	86	Hearing	2	Control	Female	TRUE	TRUE
1765	60c221f2990ce3ca5d7f5648	This statement is a LIE	Female15-clip3_3semitones_up.mp3	87	Hearing	2	Pitch	Female	Lie	FALSE
1766	60c221f2990ce3ca5d7f5648	This statement is a LIE	Male36-clip24_3semitones_up.mp3	88	Hearing	2	Pitch	Male	Lie	FALSE
1767	60c221f2990ce3ca5d7f5648	This statement is a LIE	Male24-clip8pause_control.mp3	89	Hearing	2	Pause	Male	Lie	FALSE
1768	60c221f2990ce3ca5d7f5648	This statement is a LIE	Female15-clip16pauses_control.mp3	90	Hearing	2	Pause	Female	Lie	FALSE
1769	60c221f2990ce3ca5d7f5648	This statement is a LIE	Male24-clip4_3semitones_up.mp3	91	Hearing	2	Pitch	Male	Lie	FALSE
1770	60c221f2990ce3ca5d7f5648	This statement is a LIE	Female42-clip22.mp3	92	Hearing	2	Control	Female	Lie	FALSE
1771	60c221f2990ce3ca5d7f5648	This statement is a LIE	Female42-clip2_3semitones_up.mp3	93	Hearing	2	Pitch	Female	Lie	FALSE
1772	60c221f2990ce3ca5d7f5648	This statement is a LIE	Female42-clip5_3semitones_up.mp3	94	Hearing	2	Pitch	Female	Lie	FALSE
1773	60c221f2990ce3ca5d7f5648	This statement is a LIE	Female15-clip18_3semitones_up.mp3	95	Hearing	2	Pitch	Female	Lie	FALSE
1774	60c221f2990ce3ca5d7f5648	This statement is a LIE	Male24-clip15.mp3	96	Hearing	2	Control	Male	Lie	FALSE
1775	60c221f2990ce3ca5d7f5648	This statement is a LIE	Male24-clip13_3semitones_up.mp3	98	Hearing	2	Pitch	Male	Lie	FALSE
1776	60c221f2990ce3ca5d7f5648	This statement is TRUE	Male24-clip20pause_control.mp3	99	Hearing	2	Pause	Male	TRUE	TRUE
1777	60c221f2990ce3ca5d7f5648	This statement is a LIE	Male24-clip25_3semitones_up.mp3	100	Hearing	2	Pitch	Male	Lie	FALSE
1778	60c221f2990ce3ca5d7f5648	This statement is a LIE	Female42-clip17_3semitones_up.mp3	101	Hearing	2	Pitch	Female	Lie	FALSE
1779	60c221f2990ce3ca5d7f5648	This statement is TRUE	Male24-clip9.mp3	102	Hearing	2	Control	Male	TRUE	TRUE
1780	60c221f2990ce3ca5d7f5648	This statement is a LIE	Male24-clip17pause_control.mp3	103	Hearing	2	Pause	Male	Lie	FALSE
1781	60c221f2990ce3ca5d7f5648	This statement is a LIE	Male36-clip15_3semitones_up.mp3	104	Hearing	2	Pitch	Male	Lie	FALSE
1782	60c221f2990ce3ca5d7f5648	This statement is a LIE	Female15-clip14.mp3	105	Hearing	2	Control	Female	Lie	FALSE
1783	60c22a4a32c07eed75f93af8	This statement is a LIE	Female15-clip1pause_control.mp3	1	Hearing	2	Pause	Female	Lie	FALSE
1784	60c22a4a32c07eed75f93af8	This statement is TRUE	Female15-clip6_3semitones_up.mp3	2	Hearing	2	Pitch	Female	TRUE	TRUE
1785	60c22a4a32c07eed75f93af8	This statement is TRUE	Female42-clip22.mp3	3	Hearing	2	Control	Female	TRUE	TRUE
1786	60c22a4a32c07eed75f93af8	This statement is TRUE	Female42-clip18pause_control.mp3	4	Hearing	2	Pause	Female	TRUE	TRUE
1787	60c22a4a32c07eed75f93af8	This statement is TRUE	Male36-clip1pause_control.mp3	6	Hearing	2	Pause	Male	TRUE	TRUE
1788	60c22a4a32c07eed75f93af8	This statement is a LIE	Female15-clip13pause_control.mp3	7	Hearing	2	Pause	Female	Lie	FALSE
1789	60c22a4a32c07eed75f93af8	This statement is a LIE	Female42-clip3pause_control.mp3	8	Hearing	2	Pause	Female	Lie	FALSE
1790	60c22a4a32c07eed75f93af8	This statement is TRUE	Male36-clip12_3semitones_up.mp3	9	Hearing	2	Pitch	Male	TRUE	TRUE
1791	60c22a4a32c07eed75f93af8	This statement is a LIE	Female42-clip9pause_control.mp3	10	Hearing	2	Pause	Female	Lie	FALSE
1792	60c22a4a32c07eed75f93af8	This statement is TRUE	Male36-clip15_3semitones_up.mp3	11	Hearing	2	Pitch	Male	TRUE	TRUE
1793	60c22a4a32c07eed75f93af8	This statement is TRUE	Male36-clip23.mp3	12	Hearing	2	Control	Male	TRUE	TRUE
1794	60c22a4a32c07eed75f93af8	This statement is a LIE	Male36-clip2.mp3	13	Hearing	2	Control	Male	Lie	FALSE
1795	60c22a4a32c07eed75f93af8	This statement is a LIE	Male24-clip25_3semitones_up.mp3	14	Hearing	2	Pitch	Male	Lie	FALSE
1796	60c22a4a32c07eed75f93af8	This statement is TRUE	Female42-clip6pause_control.mp3	15	Hearing	2	Pause	Female	TRUE	TRUE
1797	60c22a4a32c07eed75f93af8	This statement is a LIE	Female42-clip23_3semitones_up.mp3	16	Hearing	2	Pitch	Female	Lie	FALSE
1798	60c22a4a32c07eed75f93af8	This statement is TRUE	Female42-clip5_3semitones_up.mp3	17	Hearing	2	Pitch	Female	TRUE	TRUE
1799	60c22a4a32c07eed75f93af8	This statement is TRUE	Male24-clip6.mp3	18	Hearing	2	Control	Male	TRUE	TRUE
1800	60c22a4a32c07eed75f93af8	This statement is TRUE	Female42-clip7.mp3	19	Hearing	2	Control	Female	TRUE	TRUE
1801	60c22a4a32c07eed75f93af8	This statement is TRUE	Female42-clip16.mp3	20	Hearing	2	Control	Female	TRUE	TRUE
1802	60c22a4a32c07eed75f93af8	This statement is a LIE	Female42-clip24pause_control.mp3	21	Hearing	2	Pause	Female	Lie	FALSE
1803	60c22a4a32c07eed75f93af8	This statement is a LIE	Male24-clip13_3semitones_up.mp3	22	Hearing	2	Pitch	Male	Lie	FALSE
1804	60c22a4a32c07eed75f93af8	This statement is TRUE	Male24-clip16_3semitones_up.mp3	23	Hearing	2	Pitch	Male	TRUE	TRUE
1805	60c22a4a32c07eed75f93af8	This statement is TRUE	Female15-clip14.mp3	24	Hearing	2	Control	Female	TRUE	TRUE
1806	60c22a4a32c07eed75f93af8	This statement is TRUE	Male24-clip12.mp3	25	Hearing	2	Control	Male	TRUE	TRUE
1807	60c22a4a32c07eed75f93af8	This statement is TRUE	Female15-clip21_3semitones_up.mp3	26	Hearing	2	Pitch	Female	TRUE	TRUE
1808	60c22a4a32c07eed75f93af8	This statement is TRUE	Female15-clip9_3semitones_up.mp3	27	Hearing	2	Pitch	Female	TRUE	TRUE
1809	60c22a4a32c07eed75f93af8	This statement is a LIE	Male36-clip9_3semitones_up.mp3	28	Hearing	2	Pitch	Male	Lie	FALSE
1810	60c22a4a32c07eed75f93af8	This statement is TRUE	Male24-clip7_3semitones_up.mp3	29	Hearing	2	Pitch	Male	TRUE	TRUE
1811	60c22a4a32c07eed75f93af8	This statement is a LIE	Male24-clip20pause_control.mp3	30	Hearing	2	Pause	Male	Lie	FALSE
1812	60c22a4a32c07eed75f93af8	This statement is TRUE	Female15-clip8.mp3	31	Hearing	2	Control	Female	TRUE	TRUE
1813	60c22a4a32c07eed75f93af8	This statement is a LIE	Female42-clip2_3semitones_up.mp3	32	Hearing	2	Pitch	Female	Lie	FALSE
1814	60c22a4a32c07eed75f93af8	This statement is TRUE	Male36-clip5.mp3	33	Hearing	2	Control	Male	TRUE	TRUE
1815	60c22a4a32c07eed75f93af8	This statement is TRUE	Female42-clip12pause_control.mp3	34	Hearing	2	Pause	Female	TRUE	TRUE
1816	60c22a4a32c07eed75f93af8	This statement is a LIE	Female15-clip22pause_control.mp3	35	Hearing	2	Pause	Female	Lie	FALSE
1817	60c22a4a32c07eed75f93af8	This statement is TRUE	Male36-clip18_3semitones_up.mp3	37	Hearing	2	Pitch	Male	TRUE	TRUE
1818	60c22a4a32c07eed75f93af8	This statement is a LIE	Female15-clip7pause_control.mp3	38	Hearing	2	Pause	Female	Lie	FALSE
1819	60c22a4a32c07eed75f93af8	This statement is a LIE	Female42-clip19.mp3	40	Hearing	2	Control	Female	Lie	FALSE
1820	60c22a4a32c07eed75f93af8	This statement is TRUE	Male36-clip19pause_control.mp3	41	Hearing	2	Pause	Male	TRUE	TRUE
1821	60c22a4a32c07eed75f93af8	This statement is TRUE	Male36-clip14.mp3	42	Hearing	2	Control	Male	TRUE	TRUE
1822	60c22a4a32c07eed75f93af8	This statement is TRUE	Male24-clip23pause_control.mp3	43	Hearing	2	Pause	Male	TRUE	TRUE
1823	60c22a4a32c07eed75f93af8	This statement is TRUE	Male36-clip24_3semitones_up.mp3	44	Hearing	2	Pitch	Male	TRUE	TRUE
1824	60c22a4a32c07eed75f93af8	This statement is a LIE	Male36-clip20.mp3	46	Hearing	2	Control	Male	Lie	FALSE
1825	60c22a4a32c07eed75f93af8	This statement is TRUE	Male36-clip22pause_control.mp3	47	Hearing	2	Pause	Male	TRUE	TRUE
1826	60c22a4a32c07eed75f93af8	This statement is a LIE	Female42-clip20_3semitones_up.mp3	48	Hearing	2	Pitch	Female	Lie	FALSE
1827	60c22a4a32c07eed75f93af8	This statement is TRUE	Male24-clip17pause_control.mp3	49	Hearing	2	Pause	Male	TRUE	TRUE
1828	60c22a4a32c07eed75f93af8	This statement is TRUE	Male36-clip16pause_control.mp3	50	Hearing	2	Pause	Male	TRUE	TRUE
1829	60c22a4a32c07eed75f93af8	This statement is TRUE	Male24-clip9.mp3	51	Hearing	2	Control	Male	TRUE	TRUE
1830	60c22a4a32c07eed75f93af8	This statement is TRUE	Male36-clip3_3semitones_up.mp3	52	Hearing	2	Pitch	Male	TRUE	TRUE
1831	60c22a4a32c07eed75f93af8	This statement is TRUE	Female15-clip2.mp3	53	Hearing	2	Control	Female	TRUE	TRUE
1832	60c22a4a32c07eed75f93af8	This statement is TRUE	Male24-clip10_3semitones_up.mp3	54	Hearing	2	Pitch	Male	TRUE	TRUE
1833	60c22a4a32c07eed75f93af8	This statement is TRUE	Male36-clip11.mp3	55	Hearing	2	Control	Male	TRUE	TRUE
1834	60c22a4a32c07eed75f93af8	This statement is TRUE	Female42-clip11_3semitones_up.mp3	56	Hearing	2	Pitch	Female	TRUE	TRUE
1835	60c22a4a32c07eed75f93af8	This statement is TRUE	Male36-clip6_3semitones_up.mp3	57	Hearing	2	Pitch	Male	TRUE	TRUE
1836	60c22a4a32c07eed75f93af8	This statement is a LIE	Female42-clip13.mp3	58	Hearing	2	Control	Female	Lie	FALSE
1837	60c22a4a32c07eed75f93af8	This statement is a LIE	Male24-clip21.mp3	59	Hearing	2	Control	Male	Lie	FALSE
1838	60c22a4a32c07eed75f93af8	This statement is a LIE	Female15-clip20.mp3	60	Hearing	2	Control	Female	Lie	FALSE
1839	60c22a4a32c07eed75f93af8	This statement is TRUE	Female15-clip12_3semitones_up.mp3	62	Hearing	2	Pitch	Female	TRUE	TRUE
1840	60c22a4a32c07eed75f93af8	This statement is TRUE	Male24-clip24.mp3	63	Hearing	2	Control	Male	TRUE	TRUE
1841	60c22a4a32c07eed75f93af8	This statement is a LIE	Male24-clip5pause_control.mp3	64	Hearing	2	Pause	Male	Lie	FALSE
1842	60c22a4a32c07eed75f93af8	This statement is TRUE	Male24-clip14pause_control.mp3	65	Hearing	2	Pause	Male	TRUE	TRUE
1843	60c22a4a32c07eed75f93af8	This statement is a LIE	Male24-clip2pause_control.mp3	67	Hearing	2	Pause	Male	Lie	FALSE
1844	60c22a4a32c07eed75f93af8	This statement is a LIE	Male24-clip11pause_control.mp3	68	Hearing	2	Pause	Male	Lie	FALSE
1845	60c22a4a32c07eed75f93af8	This statement is TRUE	Female42-clip10.mp3	69	Hearing	2	Control	Female	TRUE	TRUE
1846	60c22a4a32c07eed75f93af8	This statement is a LIE	Female42-clip21pause_control.mp3	70	Hearing	2	Pause	Female	Lie	FALSE
1847	60c22a4a32c07eed75f93af8	This statement is a LIE	Male24-clip19_3semitones_up.mp3	71	Hearing	2	Pitch	Male	Lie	FALSE
1848	60c22a4a32c07eed75f93af8	This statement is a LIE	Male24-clip22_3semitones_up.mp3	72	Hearing	2	Pitch	Male	Lie	FALSE
1849	60c22a4a32c07eed75f93af8	This statement is TRUE	Female15-clip18_3semitones_up.mp3	73	Hearing	2	Pitch	Female	TRUE	TRUE
1850	60c22a4a32c07eed75f93af8	This statement is TRUE	Female15-clip11.mp3	74	Hearing	2	Control	Female	TRUE	TRUE
1851	60c22a4a32c07eed75f93af8	This statement is TRUE	Male36-clip4pause_control.mp3	75	Hearing	2	Pause	Male	TRUE	TRUE
1852	60c22a4a32c07eed75f93af8	This statement is TRUE	Female42-clip17_3semitones_up.mp3	76	Hearing	2	Pitch	Female	TRUE	TRUE
1853	60c22a4a32c07eed75f93af8	This statement is TRUE	Male24-clip1_3semitones_up.mp3	77	Hearing	2	Pitch	Male	TRUE	TRUE
1854	60c22a4a32c07eed75f93af8	This statement is a LIE	Female42-clip25.mp3	78	Hearing	2	Control	Female	Lie	FALSE
1855	60c22a4a32c07eed75f93af8	This statement is a LIE	Male24-clip3.mp3	79	Hearing	2	Control	Male	Lie	FALSE
1856	60c22a4a32c07eed75f93af8	This statement is TRUE	Male36-clip7pause_control.mp3	80	Hearing	2	Pause	Male	TRUE	TRUE
1857	60c22a4a32c07eed75f93af8	This statement is TRUE	Female15-clip19pause_control.mp3	81	Hearing	2	Pause	Female	TRUE	TRUE
1858	60c22a4a32c07eed75f93af8	This statement is TRUE	Female15-clip23.mp3	82	Hearing	2	Control	Female	TRUE	TRUE
1859	60c22a4a32c07eed75f93af8	This statement is a LIE	Female15-clip5.mp3	83	Hearing	2	Control	Female	Lie	FALSE
1860	60c22a4a32c07eed75f93af8	This statement is a LIE	Female42-clip8_3semitones_up.mp3	84	Hearing	2	Pitch	Female	Lie	FALSE
1861	60c22a4a32c07eed75f93af8	This statement is a LIE	Female15-clip24_3semitones_up.mp3	85	Hearing	2	Pitch	Female	Lie	FALSE
1862	60c22a4a32c07eed75f93af8	This statement is a LIE	Female42-clip15pause_control.mp3	86	Hearing	2	Pause	Female	Lie	FALSE
1863	60c22a4a32c07eed75f93af8	This statement is TRUE	Female42-clip14_3semitones_up.mp3	87	Hearing	2	Pitch	Female	TRUE	TRUE
1864	60c22a4a32c07eed75f93af8	This statement is TRUE	Male24-clip4_3semitones_up.mp3	88	Hearing	2	Pitch	Male	TRUE	TRUE
1865	60c22a4a32c07eed75f93af8	This statement is a LIE	Female15-clip17.mp3	89	Hearing	2	Control	Female	Lie	FALSE
1866	60c22a4a32c07eed75f93af8	This statement is TRUE	Male36-clip21_3semitones_up.mp3	90	Hearing	2	Pitch	Male	TRUE	TRUE
1867	60c22a4a32c07eed75f93af8	This statement is a LIE	Male36-clip13pause_control.mp3	91	Hearing	2	Pause	Male	Lie	FALSE
1868	60c22a4a32c07eed75f93af8	This statement is a LIE	Female15-clip15_3semitones_up.mp3	92	Hearing	2	Pitch	Female	Lie	FALSE
1869	60c22a4a32c07eed75f93af8	This statement is a LIE	Male24-clip18.mp3	93	Hearing	2	Control	Male	Lie	FALSE
1870	60c22a4a32c07eed75f93af8	This statement is a LIE	Male36-clip17.mp3	94	Hearing	2	Control	Male	Lie	FALSE
1871	60c22a4a32c07eed75f93af8	This statement is a LIE	Male36-clip10pause_control.mp3	95	Hearing	2	Pause	Male	Lie	FALSE
1872	60c22a4a32c07eed75f93af8	This statement is a LIE	Female15-clip25pause_control.mp3	96	Hearing	2	Pause	Female	Lie	FALSE
1873	60c22a4a32c07eed75f93af8	This statement is TRUE	Female42-clip4.mp3	97	Hearing	2	Control	Female	TRUE	TRUE
1874	60c22a4a32c07eed75f93af8	This statement is a LIE	Male24-clip15.mp3	98	Hearing	2	Control	Male	Lie	FALSE
1875	60c22a4a32c07eed75f93af8	This statement is TRUE	Female15-clip16pauses_control.mp3	99	Hearing	2	Pause	Female	TRUE	TRUE
1876	60c22a4a32c07eed75f93af8	This statement is TRUE	Male24-clip8pause_control.mp3	100	Hearing	2	Pause	Male	TRUE	TRUE
1877	60c22a4a32c07eed75f93af8	This statement is TRUE	Female15-clip3_3semitones_up.mp3	101	Hearing	2	Pitch	Female	TRUE	TRUE
1878	60c22a4a32c07eed75f93af8	This statement is TRUE	Female42-clip1.mp3	102	Hearing	2	Control	Female	TRUE	TRUE
1879	60c22a4a32c07eed75f93af8	This statement is TRUE	Female15-clip10pause_control.mp3	103	Hearing	2	Pause	Female	TRUE	TRUE
1880	60c22a4a32c07eed75f93af8	This statement is TRUE	Male36-clip8.mp3	104	Hearing	2	Control	Male	TRUE	TRUE
1881	60c22a4a32c07eed75f93af8	This statement is TRUE	Female15-clip4pause_control.mp3	105	Hearing	2	Pause	Female	TRUE	TRUE
1882	60c234d5a10d4a24fe0e4ca5	This statement is a LIE	Female15-clip1pause_control.mp3	1	Hearing	2	Pause	Female	Lie	FALSE
1883	60c234d5a10d4a24fe0e4ca5	This statement is TRUE	Male36-clip10pause_control.mp3	2	Hearing	2	Pause	Male	TRUE	TRUE
1884	60c234d5a10d4a24fe0e4ca5	This statement is TRUE	Male36-clip15_3semitones_up.mp3	3	Hearing	2	Pitch	Male	TRUE	TRUE
1885	60c234d5a10d4a24fe0e4ca5	This statement is a LIE	Female42-clip4.mp3	4	Hearing	2	Control	Female	Lie	FALSE
1886	60c234d5a10d4a24fe0e4ca5	This statement is TRUE	Male36-clip24_3semitones_up.mp3	5	Hearing	2	Pitch	Male	TRUE	TRUE
1887	60c234d5a10d4a24fe0e4ca5	This statement is TRUE	Male36-clip9_3semitones_up.mp3	7	Hearing	2	Pitch	Male	TRUE	TRUE
1888	60c234d5a10d4a24fe0e4ca5	This statement is TRUE	Male24-clip8pause_control.mp3	8	Hearing	2	Pause	Male	TRUE	TRUE
1889	60c234d5a10d4a24fe0e4ca5	This statement is TRUE	Female42-clip6pause_control.mp3	9	Hearing	2	Pause	Female	TRUE	TRUE
1890	60c234d5a10d4a24fe0e4ca5	This statement is TRUE	Female15-clip13pause_control.mp3	10	Hearing	2	Pause	Female	TRUE	TRUE
1891	60c234d5a10d4a24fe0e4ca5	This statement is a LIE	Male36-clip21_3semitones_up.mp3	11	Hearing	2	Pitch	Male	Lie	FALSE
1892	60c234d5a10d4a24fe0e4ca5	This statement is TRUE	Female42-clip7.mp3	12	Hearing	2	Control	Female	TRUE	TRUE
1893	60c234d5a10d4a24fe0e4ca5	This statement is TRUE	Male24-clip13_3semitones_up.mp3	14	Hearing	2	Pitch	Male	TRUE	TRUE
1894	60c234d5a10d4a24fe0e4ca5	This statement is a LIE	Male24-clip20pause_control.mp3	15	Hearing	2	Pause	Male	Lie	FALSE
1895	60c234d5a10d4a24fe0e4ca5	This statement is a LIE	Female42-clip23_3semitones_up.mp3	16	Hearing	2	Pitch	Female	Lie	FALSE
1896	60c234d5a10d4a24fe0e4ca5	This statement is TRUE	Female15-clip3_3semitones_up.mp3	17	Hearing	2	Pitch	Female	TRUE	TRUE
1897	60c234d5a10d4a24fe0e4ca5	This statement is a LIE	Male24-clip7_3semitones_up.mp3	18	Hearing	2	Pitch	Male	Lie	FALSE
1898	60c234d5a10d4a24fe0e4ca5	This statement is TRUE	Male24-clip16_3semitones_up.mp3	19	Hearing	2	Pitch	Male	TRUE	TRUE
1899	60c234d5a10d4a24fe0e4ca5	This statement is TRUE	Male36-clip1pause_control.mp3	20	Hearing	2	Pause	Male	TRUE	TRUE
1900	60c234d5a10d4a24fe0e4ca5	This statement is a LIE	Male36-clip19pause_control.mp3	21	Hearing	2	Pause	Male	Lie	FALSE
1901	60c234d5a10d4a24fe0e4ca5	This statement is TRUE	Female15-clip15_3semitones_up.mp3	22	Hearing	2	Pitch	Female	TRUE	TRUE
1902	60c234d5a10d4a24fe0e4ca5	This statement is TRUE	Female15-clip22pause_control.mp3	23	Hearing	2	Pause	Female	TRUE	TRUE
1903	60c234d5a10d4a24fe0e4ca5	This statement is TRUE	Male24-clip1_3semitones_up.mp3	24	Hearing	2	Pitch	Male	TRUE	TRUE
1904	60c234d5a10d4a24fe0e4ca5	This statement is TRUE	Female42-clip20_3semitones_up.mp3	25	Hearing	2	Pitch	Female	TRUE	TRUE
1905	60c234d5a10d4a24fe0e4ca5	This statement is a LIE	Female42-clip12pause_control.mp3	26	Hearing	2	Pause	Female	Lie	FALSE
1906	60c234d5a10d4a24fe0e4ca5	This statement is TRUE	Male36-clip5.mp3	27	Hearing	2	Control	Male	TRUE	TRUE
1907	60c234d5a10d4a24fe0e4ca5	This statement is TRUE	Male24-clip23pause_control.mp3	28	Hearing	2	Pause	Male	TRUE	TRUE
1908	60c234d5a10d4a24fe0e4ca5	This statement is TRUE	Female42-clip5_3semitones_up.mp3	29	Hearing	2	Pitch	Female	TRUE	TRUE
1909	60c234d5a10d4a24fe0e4ca5	This statement is a LIE	Male24-clip15.mp3	30	Hearing	2	Control	Male	Lie	FALSE
1910	60c234d5a10d4a24fe0e4ca5	This statement is TRUE	Female42-clip11_3semitones_up.mp3	31	Hearing	2	Pitch	Female	TRUE	TRUE
1911	60c234d5a10d4a24fe0e4ca5	This statement is TRUE	Female42-clip9pause_control.mp3	32	Hearing	2	Pause	Female	TRUE	TRUE
1912	60c234d5a10d4a24fe0e4ca5	This statement is a LIE	Male36-clip12_3semitones_up.mp3	33	Hearing	2	Pitch	Male	Lie	FALSE
1913	60c234d5a10d4a24fe0e4ca5	This statement is TRUE	Male24-clip6.mp3	34	Hearing	2	Control	Male	TRUE	TRUE
1914	60c234d5a10d4a24fe0e4ca5	This statement is TRUE	Male24-clip4_3semitones_up.mp3	35	Hearing	2	Pitch	Male	TRUE	TRUE
1915	60c234d5a10d4a24fe0e4ca5	This statement is TRUE	Female15-clip20.mp3	36	Hearing	2	Control	Female	TRUE	TRUE
1916	60c234d5a10d4a24fe0e4ca5	This statement is a LIE	Male24-clip12.mp3	37	Hearing	2	Control	Male	Lie	FALSE
1917	60c234d5a10d4a24fe0e4ca5	This statement is TRUE	Female15-clip24_3semitones_up.mp3	38	Hearing	2	Pitch	Female	TRUE	TRUE
1918	60c234d5a10d4a24fe0e4ca5	This statement is TRUE	Female15-clip21_3semitones_up.mp3	39	Hearing	2	Pitch	Female	TRUE	TRUE
1919	60c234d5a10d4a24fe0e4ca5	This statement is a LIE	Female42-clip13.mp3	40	Hearing	2	Control	Female	Lie	FALSE
1920	60c234d5a10d4a24fe0e4ca5	This statement is a LIE	Male24-clip14pause_control.mp3	41	Hearing	2	Pause	Male	Lie	FALSE
1921	60c234d5a10d4a24fe0e4ca5	This statement is a LIE	Female42-clip8_3semitones_up.mp3	43	Hearing	2	Pitch	Female	Lie	FALSE
1922	60c234d5a10d4a24fe0e4ca5	This statement is a LIE	Male36-clip22pause_control.mp3	44	Hearing	2	Pause	Male	Lie	FALSE
1923	60c234d5a10d4a24fe0e4ca5	This statement is a LIE	Female42-clip21pause_control.mp3	45	Hearing	2	Pause	Female	Lie	FALSE
1924	60c234d5a10d4a24fe0e4ca5	This statement is TRUE	Female15-clip23.mp3	46	Hearing	2	Control	Female	TRUE	TRUE
1925	60c234d5a10d4a24fe0e4ca5	This statement is TRUE	Male36-clip11.mp3	47	Hearing	2	Control	Male	TRUE	TRUE
1926	60c234d5a10d4a24fe0e4ca5	This statement is TRUE	Female42-clip22.mp3	48	Hearing	2	Control	Female	TRUE	TRUE
1927	60c234d5a10d4a24fe0e4ca5	This statement is TRUE	Male36-clip2.mp3	49	Hearing	2	Control	Male	TRUE	TRUE
1928	60c234d5a10d4a24fe0e4ca5	This statement is TRUE	Female15-clip12_3semitones_up.mp3	50	Hearing	2	Pitch	Female	TRUE	TRUE
1929	60c234d5a10d4a24fe0e4ca5	This statement is TRUE	Female15-clip11.mp3	51	Hearing	2	Control	Female	TRUE	TRUE
1930	60c234d5a10d4a24fe0e4ca5	This statement is a LIE	Female42-clip3pause_control.mp3	52	Hearing	2	Pause	Female	Lie	FALSE
1931	60c234d5a10d4a24fe0e4ca5	This statement is a LIE	Male24-clip17pause_control.mp3	53	Hearing	2	Pause	Male	Lie	FALSE
1932	60c234d5a10d4a24fe0e4ca5	This statement is TRUE	Male36-clip14.mp3	54	Hearing	2	Control	Male	TRUE	TRUE
1933	60c234d5a10d4a24fe0e4ca5	This statement is TRUE	Male24-clip9.mp3	55	Hearing	2	Control	Male	TRUE	TRUE
1934	60c234d5a10d4a24fe0e4ca5	This statement is a LIE	Male24-clip22_3semitones_up.mp3	56	Hearing	2	Pitch	Male	Lie	FALSE
1935	60c234d5a10d4a24fe0e4ca5	This statement is a LIE	Female15-clip25pause_control.mp3	57	Hearing	2	Pause	Female	Lie	FALSE
1936	60c234d5a10d4a24fe0e4ca5	This statement is TRUE	Female15-clip19pause_control.mp3	58	Hearing	2	Pause	Female	TRUE	TRUE
1937	60c234d5a10d4a24fe0e4ca5	This statement is a LIE	Female15-clip4pause_control.mp3	59	Hearing	2	Pause	Female	Lie	FALSE
1938	60c234d5a10d4a24fe0e4ca5	This statement is TRUE	Female15-clip5.mp3	60	Hearing	2	Control	Female	TRUE	TRUE
1939	60c234d5a10d4a24fe0e4ca5	This statement is TRUE	Male24-clip3.mp3	61	Hearing	2	Control	Male	TRUE	TRUE
1940	60c234d5a10d4a24fe0e4ca5	This statement is TRUE	Female42-clip17_3semitones_up.mp3	62	Hearing	2	Pitch	Female	TRUE	TRUE
1941	60c234d5a10d4a24fe0e4ca5	This statement is TRUE	Female15-clip8.mp3	63	Hearing	2	Control	Female	TRUE	TRUE
1942	60c234d5a10d4a24fe0e4ca5	This statement is TRUE	Female15-clip9_3semitones_up.mp3	64	Hearing	2	Pitch	Female	TRUE	TRUE
1943	60c234d5a10d4a24fe0e4ca5	This statement is a LIE	Male24-clip2pause_control.mp3	65	Hearing	2	Pause	Male	Lie	FALSE
1944	60c234d5a10d4a24fe0e4ca5	This statement is TRUE	Male36-clip23.mp3	66	Hearing	2	Control	Male	TRUE	TRUE
1945	60c234d5a10d4a24fe0e4ca5	This statement is TRUE	Female15-clip17.mp3	67	Hearing	2	Control	Female	TRUE	TRUE
1946	60c234d5a10d4a24fe0e4ca5	This statement is TRUE	Female15-clip18_3semitones_up.mp3	68	Hearing	2	Pitch	Female	TRUE	TRUE
1947	60c234d5a10d4a24fe0e4ca5	This statement is a LIE	Female42-clip1.mp3	69	Hearing	2	Control	Female	Lie	FALSE
1948	60c234d5a10d4a24fe0e4ca5	This statement is TRUE	Female15-clip16pauses_control.mp3	70	Hearing	2	Pause	Female	TRUE	TRUE
1949	60c234d5a10d4a24fe0e4ca5	This statement is TRUE	Male36-clip6_3semitones_up.mp3	71	Hearing	2	Pitch	Male	TRUE	TRUE
1950	60c234d5a10d4a24fe0e4ca5	This statement is a LIE	Male24-clip18.mp3	72	Hearing	2	Control	Male	Lie	FALSE
1951	60c234d5a10d4a24fe0e4ca5	This statement is TRUE	Male24-clip11pause_control.mp3	73	Hearing	2	Pause	Male	TRUE	TRUE
1952	60c234d5a10d4a24fe0e4ca5	This statement is TRUE	Male24-clip24.mp3	74	Hearing	2	Control	Male	TRUE	TRUE
1953	60c234d5a10d4a24fe0e4ca5	This statement is TRUE	Female42-clip16.mp3	75	Hearing	2	Control	Female	TRUE	TRUE
1954	60c234d5a10d4a24fe0e4ca5	This statement is TRUE	Male24-clip21.mp3	76	Hearing	2	Control	Male	TRUE	TRUE
1955	60c234d5a10d4a24fe0e4ca5	This statement is TRUE	Female42-clip10.mp3	77	Hearing	2	Control	Female	TRUE	TRUE
1956	60c234d5a10d4a24fe0e4ca5	This statement is a LIE	Female42-clip15pause_control.mp3	79	Hearing	2	Pause	Female	Lie	FALSE
1957	60c234d5a10d4a24fe0e4ca5	This statement is a LIE	Male36-clip13pause_control.mp3	80	Hearing	2	Pause	Male	Lie	FALSE
1958	60c234d5a10d4a24fe0e4ca5	This statement is a LIE	Female42-clip2_3semitones_up.mp3	81	Hearing	2	Pitch	Female	Lie	FALSE
1959	60c234d5a10d4a24fe0e4ca5	This statement is TRUE	Female42-clip25.mp3	83	Hearing	2	Control	Female	TRUE	TRUE
1960	60c234d5a10d4a24fe0e4ca5	This statement is TRUE	Female15-clip6_3semitones_up.mp3	84	Hearing	2	Pitch	Female	TRUE	TRUE
1961	60c234d5a10d4a24fe0e4ca5	This statement is TRUE	Female42-clip18pause_control.mp3	85	Hearing	2	Pause	Female	TRUE	TRUE
1962	60c234d5a10d4a24fe0e4ca5	This statement is TRUE	Female15-clip10pause_control.mp3	86	Hearing	2	Pause	Female	TRUE	TRUE
1963	60c234d5a10d4a24fe0e4ca5	This statement is TRUE	Male36-clip7pause_control.mp3	87	Hearing	2	Pause	Male	TRUE	TRUE
1964	60c234d5a10d4a24fe0e4ca5	This statement is a LIE	Male36-clip4pause_control.mp3	88	Hearing	2	Pause	Male	Lie	FALSE
1965	60c234d5a10d4a24fe0e4ca5	This statement is TRUE	Female15-clip2.mp3	89	Hearing	2	Control	Female	TRUE	TRUE
1966	60c234d5a10d4a24fe0e4ca5	This statement is TRUE	Male24-clip10_3semitones_up.mp3	90	Hearing	2	Pitch	Male	TRUE	TRUE
1967	60c234d5a10d4a24fe0e4ca5	This statement is TRUE	Male36-clip17.mp3	91	Hearing	2	Control	Male	TRUE	TRUE
1968	60c234d5a10d4a24fe0e4ca5	This statement is TRUE	Male24-clip19_3semitones_up.mp3	92	Hearing	2	Pitch	Male	TRUE	TRUE
1969	60c234d5a10d4a24fe0e4ca5	This statement is a LIE	Female15-clip7pause_control.mp3	94	Hearing	2	Pause	Female	Lie	FALSE
1970	60c234d5a10d4a24fe0e4ca5	This statement is TRUE	Male24-clip25_3semitones_up.mp3	95	Hearing	2	Pitch	Male	TRUE	TRUE
1971	60c234d5a10d4a24fe0e4ca5	This statement is a LIE	Male36-clip3_3semitones_up.mp3	96	Hearing	2	Pitch	Male	Lie	FALSE
1972	60c234d5a10d4a24fe0e4ca5	This statement is TRUE	Male36-clip20.mp3	97	Hearing	2	Control	Male	TRUE	TRUE
1973	60c234d5a10d4a24fe0e4ca5	This statement is TRUE	Male24-clip5pause_control.mp3	98	Hearing	2	Pause	Male	TRUE	TRUE
1974	60c234d5a10d4a24fe0e4ca5	This statement is TRUE	Female42-clip24pause_control.mp3	99	Hearing	2	Pause	Female	TRUE	TRUE
1975	60c234d5a10d4a24fe0e4ca5	This statement is TRUE	Male36-clip18_3semitones_up.mp3	100	Hearing	2	Pitch	Male	TRUE	TRUE
1976	60c234d5a10d4a24fe0e4ca5	This statement is TRUE	Female42-clip14_3semitones_up.mp3	101	Hearing	2	Pitch	Female	TRUE	TRUE
1977	60c234d5a10d4a24fe0e4ca5	This statement is TRUE	Male36-clip8.mp3	102	Hearing	2	Control	Male	TRUE	TRUE
1978	60c234d5a10d4a24fe0e4ca5	This statement is TRUE	Female15-clip14.mp3	103	Hearing	2	Control	Female	TRUE	TRUE
1979	60c234d5a10d4a24fe0e4ca5	This statement is TRUE	Male36-clip16pause_control.mp3	104	Hearing	2	Pause	Male	TRUE	TRUE
1980	60c234d5a10d4a24fe0e4ca5	This statement is TRUE	Female42-clip19.mp3	105	Hearing	2	Control	Female	TRUE	TRUE
1981	60c23722018cd2d95a294f6c	This statement is TRUE	Female15-clip1pause_control.mp3	1	Hearing	2	Pause	Female	TRUE	TRUE
1982	60c23722018cd2d95a294f6c	This statement is TRUE	Male24-clip18.mp3	2	Hearing	2	Control	Male	TRUE	TRUE
1983	60c23722018cd2d95a294f6c	This statement is TRUE	Female42-clip18pause_control.mp3	3	Hearing	2	Pause	Female	TRUE	TRUE
1984	60c23722018cd2d95a294f6c	This statement is TRUE	Female42-clip25.mp3	4	Hearing	2	Control	Female	TRUE	TRUE
1985	60c23722018cd2d95a294f6c	This statement is a LIE	Female15-clip15_3semitones_up.mp3	5	Hearing	2	Pitch	Female	Lie	FALSE
1986	60c23722018cd2d95a294f6c	This statement is TRUE	Male24-clip6.mp3	6	Hearing	2	Control	Male	TRUE	TRUE
1987	60c23722018cd2d95a294f6c	This statement is a LIE	Male36-clip2.mp3	7	Hearing	2	Control	Male	Lie	FALSE
1988	60c23722018cd2d95a294f6c	This statement is a LIE	Female15-clip2.mp3	8	Hearing	2	Control	Female	Lie	FALSE
1989	60c23722018cd2d95a294f6c	This statement is a LIE	Female15-clip25pause_control.mp3	9	Hearing	2	Pause	Female	Lie	FALSE
1990	60c23722018cd2d95a294f6c	This statement is TRUE	Male36-clip1pause_control.mp3	10	Hearing	2	Pause	Male	TRUE	TRUE
1991	60c23722018cd2d95a294f6c	This statement is TRUE	Female42-clip14_3semitones_up.mp3	11	Hearing	2	Pitch	Female	TRUE	TRUE
1992	60c23722018cd2d95a294f6c	This statement is TRUE	Male24-clip25_3semitones_up.mp3	12	Hearing	2	Pitch	Male	TRUE	TRUE
1993	60c23722018cd2d95a294f6c	This statement is a LIE	Male36-clip13pause_control.mp3	13	Hearing	2	Pause	Male	Lie	FALSE
1994	60c23722018cd2d95a294f6c	This statement is a LIE	Female42-clip20_3semitones_up.mp3	14	Hearing	2	Pitch	Female	Lie	FALSE
1995	60c23722018cd2d95a294f6c	This statement is TRUE	Female15-clip7pause_control.mp3	15	Hearing	2	Pause	Female	TRUE	TRUE
1996	60c23722018cd2d95a294f6c	This statement is a LIE	Female42-clip6pause_control.mp3	16	Hearing	2	Pause	Female	Lie	FALSE
1997	60c23722018cd2d95a294f6c	This statement is a LIE	Female15-clip23.mp3	17	Hearing	2	Control	Female	Lie	FALSE
[truncated: 7,906 more rows]
